# 1 **The evolutionary history of Neandertal and Denisovan** 2 **Y chromosomes**

3  
4 Martin Petr<sup>1\*</sup>, Mateja Hajdinjak<sup>1,13</sup>, Qiaomei Fu<sup>2,3,4</sup>, Elena Essel<sup>1</sup>, H el ene Rougier<sup>5</sup>, Isabelle  
5 Crevecoeur<sup>6</sup>, Patrick Semal<sup>7</sup>, Liubov V. Golovanova<sup>8</sup>, Vladimir B. Doronichev<sup>8</sup>, Carles Lalueza-  
6 Fox<sup>9</sup>, Marco de la Rasilla<sup>10</sup>, Antonio Rosas<sup>11</sup>, Michael V. Shunkov<sup>12</sup>, Maxim B. Kozlikin<sup>12</sup>,  
7 Anatoli P. Derevianko<sup>12</sup>, Benjamin Vernot<sup>1</sup>, Matthias Meyer<sup>1</sup>, Janet Kelso<sup>1\*</sup>

8  
9 <sup>1</sup> Department of Evolutionary Genetics, Max Planck Institute for Evolutionary Anthropology, D-04103 Leipzig,  
10 Germany.

11 <sup>2</sup> Key Laboratory of Vertebrate Evolution and Human Origins of Chinese Academy of Sciences, IVPP, CAS,  
12 Beijing 100044, China.

13 <sup>3</sup> CAS Center for Excellence in Life and Paleoenvironment, Beijing 100044, China.

14 <sup>4</sup> University of Chinese Academy of Sciences, Beijing 100049, China.

15 <sup>5</sup> Department of Anthropology, California State University Northridge, Northridge, California 91330-8244, USA.

16 <sup>6</sup> Universit e de Bordeaux, CNRS, UMR 5199-PACEA, 33615 Pessac Cedex, France.

17 <sup>7</sup> Royal Belgian Institute of Natural Sciences, 1000 Brussels, Belgium.

18 <sup>8</sup> ANO Laboratory of Prehistory 14 Linia 3-11, St Petersburg 1990 34, Russia.

19 <sup>9</sup> Institute of Evolutionary Biology, Consejo Superior de Investigaciones Cient ficas, Universitat Pompeu Fabra,  
20 08003 Barcelona, Spain.

21 <sup>10</sup>  rea de Prehistoria, Departamento de Historia, Universidad de Oviedo, 33011 Oviedo, Spain.

22 <sup>11</sup> Departamento de Paleobiolog a, Museo Nacional de Ciencias Naturales, Consejo Superior de Investigaciones  
23 Cient ficas, 28006 Madrid, Spain.

24 <sup>12</sup> Institute of Archeology and Ethnography, Siberian Branch, Russian Academy of Sciences, Novosibirsk, Russia

25 <sup>13</sup> The Francis Crick Institute, NW1 1AT London, United Kingdom.

26 \* Correspondence should be addressed to: [mp@bodkan.net](mailto:mp@bodkan.net) or [kelso@eva.mpg.de](mailto:kelso@eva.mpg.de)

## 27 **Abstract**

28 Ancient DNA has allowed the study of various aspects of human history in unprecedented detail.  
29 However, because the majority of archaic human specimens preserved well enough for genome  
30 sequencing have been female, comprehensive studies of Y chromosomes of Denisovans and  
31 Neandertals have not yet been possible. Here we present sequences of the first Denisovan Y  
32 chromosomes (*Denisova 4* and *Denisova 8*), as well as the Y chromosomes of three late  
33 Neandertals (*Spy 94a*, *Mezmaiskaya 2* and *El Sidrón 1253*). We find that the Denisovan Y  
34 chromosomes split around 700 thousand years ago (kya) from a lineage shared by Neandertal and  
35 modern human Y chromosomes, which diverged from each other around 370 kya. The  
36 phylogenetic relationships of archaic and modern human Y chromosomes therefore differ from  
37 population relationships inferred from their autosomal genomes, and mirror the relationships  
38 observed on the level of mitochondrial DNA. This provides strong evidence that gene flow from  
39 an early lineage related to modern humans resulted in the replacement of both the mitochondrial  
40 and Y chromosomal gene pools in late Neandertals. Although unlikely under neutrality, we show  
41 that this replacement is plausible if the low effective population size of Neandertals resulted in an  
42 increased genetic load in their Y chromosomes and mitochondrial DNA relative to modern  
43 humans.

44

## 45 **Introduction**

46 Ancient DNA (aDNA) has transformed our understanding of human evolutionary history,  
47 revealing complex patterns of population migration, turnover and gene flow, including admixture  
48 from archaic humans into modern humans around 55 thousand years ago (kya) (1–4). The majority  
49 of insights into the relationships between archaic and modern humans have been based on  
50 autosomal sequences, which represent a composite of genealogies of any individual’s ancestors.  
51 Although mitochondrial DNA (mtDNA) and Y chromosomes only provide information about  
52 single maternal and paternal lineages, they offer a unique perspective on various aspects of  
53 population history such as sex-specific migration and other cultural phenomena (5–7).  
54 Furthermore, because of their lower effective population size ( $N_e$ ) compared to autosomal loci,  
55 coalescent times of mtDNA and Y chromosomes sampled from two populations provide an upper  
56 bound for the last time they experienced gene flow. In this respect, the mtDNA and autosomal  
57 sequences of Neandertals, Denisovans and modern humans have revealed puzzling phylogenetic  
58 discrepancies. Their autosomal genomes show that Neandertals and Denisovans are sister groups  
59 that split from a common ancestor with modern humans between 550–765 kya (8). In contrast,  
60 with the TMRCA with modern humans of 360–468 kya, mtDNAs of Neandertals are more similar  
61 to the mtDNAs of modern humans than to those of Denisovans (9). Intriguingly, ~400 ky old early  
62 Neandertals from Sima de los Huesos were shown to carry mitochondrial genomes related to  
63 Denisovan mtDNAs, which is concordant with the autosomal relationships between these groups  
64 of archaic humans (10, 11). Based on these results it has been suggested that Neandertals originally  
65 carried a Denisovan-like mtDNA which was later completely replaced via gene flow from an early  
66 lineage related to modern humans (9, 11).

67 Y chromosomes of Neandertals and Denisovans could provide an important additional  
68 source of information about population splits and gene flow events between archaic and modern  
69 humans or populations related to them. However, with the exception of a small amount of  
70 Neandertal Y chromosome coding sequence (118 kb, (12)), none of the male Neandertals or  
71 Denisovans studied to date have yielded sufficient amounts of endogenous DNA to allow  
72 comprehensive studies of entire Y chromosomes.

### 73 **Specimens, DNA capture and genotyping**

74 Previous genetic studies identified two male Denisovans, *Denisova 4* (55–84 ky old) and *Denisova*  
75 *8* (106–136 ky old) (13, 14), and two male late Neandertals, *Spy 94a* (38-39 ky old) and  
76 *Mezmaiskaya 2* (43-45 ky old) (15) (Figure 1A). To enrich for hominin Y chromosome DNA of  
77 these individuals, we designed DNA capture probes targeting ~6.9 Mb of the non-recombining  
78 portion of the human Y chromosome sequence (Figure 1C, Supplementary Information). Using  
79 these probes, we performed hybridization capture on selected single-stranded DNA libraries from  
80 *Denisova 4*, *Denisova 8*, *Spy 94a*, and *Mezmaiskaya 2* (Supplementary Information). The captured  
81 DNA molecules were sequenced from both ends, overlapping reads were merged and aligned to  
82 the human reference genome (hg19/GRCh37) (Supplementary Information). Reads of at least 35  
83 base-pair (bp) in length that aligned uniquely to the capture target regions were retained for further  
84 analysis.

85 Of the total ~6.9 Mb of Y chromosome capture target regions, we generated 1.4X for  
86 *Denisova 4*, 3.5X for *Denisova 8*, 0.8X for *Spy 94a* and 14.3X for *Mezmaiskaya 2* (Figure 1B,  
87 Table S4.1). In addition, we sequenced 7.9X coverage of a smaller subset of the Y chromosome  
88 of the ~46-53-ky-old *El Sidrón 1253* Neandertal from Spain (Figure 1B, Table S4.1) (16) by  
89 capturing a set of previously generated double-stranded, UDG-treated libraries (17) using a ~560

90 kb capture array designed to study modern human Y chromosome variation (5). This data provides  
91 an opportunity for validating our results with different sample preparation and capture strategies.

92 To call genotypes for the captured archaic human Y chromosomes, we leveraged the  
93 haploid nature of the human Y chromosome and implemented a consensus approach that requires  
94 90% of the reads observed at each site to agree on a single allele, restricting to sites covered by at  
95 least three reads (Supplementary information; Table S5.1). This approach minimizes the impact of  
96 aDNA damage on genotyping accuracy (Figure S5.1) while allowing for a small proportion of  
97 sequencing errors, contamination or misalignment (Supplementary Information). To obtain a  
98 reference panel of modern human Y chromosomes for the analyses below, we applied the same  
99 genotype calling procedure to a set of previously published modern human Y chromosomes (6,  
100 18, 19) (Supplementary Information).

## 101 **Archaic Y chromosome phylogeny**

102 To determine the relationships between Denisovan, Neandertal and modern human Y  
103 chromosomes we constructed a neighbor-joining tree from the alignment of Y chromosome  
104 genotype calls (Supplementary Information). Unlike the rest of the nuclear genome, which puts  
105 Denisovans and Neandertals as sister groups to modern humans (2), we found that the Denisovan  
106 Y chromosomes form a separate lineage that split before Neandertal and modern human Y  
107 chromosomes diverged from each other (Figure 2A, 100% bootstrap support for both ancestral  
108 nodes). Notably, all three late Neandertal Y chromosomes cluster together and fall outside of the  
109 variation of present-day human Y chromosomes (Figure 2A, 100% bootstrap support), which  
110 includes the African Y chromosome lineage A00 known to have diverged from all other present-  
111 day human Y chromosomes around 250 kya (6).

## 112 **Ages of Y chromosomal ancestors**

113 To estimate the time to the most recent common ancestor (TMRCA) of archaic and modern human  
114 Y chromosomes we followed an approach similar to that taken by Mendez *et al.*, expressing this  
115 TMRCA relative to the deepest known split within present-human Y chromosomes (African Y  
116 chromosome lineage A00, (6, 12), Supplementary Information). This has the advantage of not  
117 relying on private mutations on the archaic human branch which makes it robust to low coverage  
118 and aDNA damage which vary significantly between samples (Figure 2A, Table S4.1, Figure  
119 S5.1).

120 We first calculated the mutation rate in the total 6.9 Mb target regions to be  $7.34 \times 10^{-10}$  per  
121 bp per year (bootstrap CI:  $6.27\text{-}8.46 \times 10^{-10}$ ; Figure S7.1, Table S7.2, Supplementary Information).  
122 Using this mutation rate, we estimated the TMRCA of the African A00 lineage and a set of non-  
123 African Y chromosomes from the SGDP panel (6, 19) at ~249 kya (bootstrap CI: 213-293 kya;  
124 Figure S7.1, Table S7.2, Supplementary information). These estimates are consistent with values  
125 inferred from larger-scale studies of present-day human Y chromosomes (6, 18), suggesting that  
126 the Y chromosomal regions we defined for capture are not unusual in terms of their mutation rate.

127 Second, assuming the A00 divergence time of 249 kya, we inferred TMRCA between  
128 archaic Y chromosomes and present-day non-African Y chromosomes for each archaic individual  
129 at a time (Figure S7.4, Table S7.3, Supplementary information). We found that the two Denisovan  
130 Y chromosomes (*Denisova 4* and *Denisova 8*) split from the modern human lineage around 700  
131 kya (CI: 607-833 kya for the higher coverage *Denisova 8*, Figure 2B, Table S7.3). In contrast, the  
132 three Neandertal Y chromosomes split from the modern human lineage about 350 kya: 353 kya  
133 for *Spy 94a* (286-449 kya), 369 kya for *Mezmaiskaya 2* (326-419 kya) and 339 kya for *El Sidrón*  
134 *1253* (275-408 kya) (Figure 2B, Table S7.3). Additionally, we used the proportions of sharing of

135 derived alleles with the high-coverage Mezmaiskaya 2 Y chromosome to estimate the TMRCA of  
136 the three Neanderthal Y chromosomes at around 100 kya (Figure S7.14 and S7.15). We validated  
137 the robustness of all TMRCA estimates by repeating the analyses using filters of varying levels of  
138 stringency and different genotype calling methods (Figures S7.9, S7.11, S7.13). Similarly,  
139 although we detected some evidence of capture bias in the data (Figure S4.5), we observed no  
140 significant differences between capture data and shotgun sequences or between individuals  
141 showing different read length distributions, indicating that the effect of technical biases on our  
142 inferences is negligible (Figure S7.11).

143         The Denisovan-modern human Y chromosome TMRCA estimates are in good agreement  
144 with population split times inferred from autosomal sequences, suggesting that the differentiation  
145 of Denisovan Y chromosomes from modern humans occurred through a simple population split  
146 (20). In contrast, the Neanderthal-modern human Y chromosome TMRCA estimates are significantly  
147 younger than the inferred population split time (Figure 3A) and consistent with a time window for  
148 gene flow from a lineage related modern humans into Neandertals inferred from mtDNA (9) and  
149 autosomal sequences (21, 22).

## 150 **Disagreement with the previous Y chromosome TMRCA**

151 Our estimates of the Neanderthal-modern human TMRCA, including those obtained using the larger  
152 amount of data we generated from the same individual (TMRCA of ~339 kya, Figure 2B), are  
153 substantially younger than the previous estimate of ~588 kya from the *El Sidrón 1253* Neanderthal  
154 (12). The previous estimate was based on ~3X coverage of 118 kb of exome capture sequence and,  
155 due to the limited amount of data, used SNPs supported even by single reads (12, 17). Although  
156 the TMRCA inference procedure used by (12) does not rely directly on the counts of private  
157 mutations on the archaic lineage (Figure S7.4, Supplementary Information), it can still be affected

158 by erroneous genotype calls, which can lead to shared derived variants being converted to the  
159 ancestral state, increasing the apparent TMRCA. Indeed, when we applied our stricter filtering  
160 criteria to the *El Sidrón 1253* data analyzed previously, we arrived at TMRCA estimates for *El*  
161 *Sidrón 1253* that are consistent with the other Neandertals in our study (Figure S7.12).

## 162 **The probability of replacement**

163 The phylogenetic relationships of archaic and modern human Y chromosomes are similar to the  
164 observations made from mtDNA genomes (9, 10), suggesting that both mtDNA and Y  
165 chromosomes of early Neandertals have been replaced via gene flow from an early lineage related  
166 to modern humans, possibly as a result of the same population contact (Figure 3A, (9)). Although  
167 such contact has been proposed, previous work suggests gene flow from modern humans into  
168 Neandertals on the order of only a few percent (21, 23). Assuming neutrality, the fixation  
169 probability of a locus is equal to its initial frequency in a population (24). Therefore, the joint  
170 probability of both Neandertal mtDNA and Y chromosome replacements by their modern human  
171 counterparts under neutrality is even lower. However, several studies have suggested that due to  
172 their low  $N_e$  and reduced efficacy of purifying selection, Neandertals may have accumulated an  
173 excess of deleterious variation compared to modern humans (25, 26) and sequencing of the exomes  
174 of three Neandertals directly demonstrated that they carried more deleterious alleles than present-  
175 day humans (17). To explore the dynamics of introgression into Neandertals, we simulated the  
176 frequency trajectories of a non-recombining, uniparental locus under a model of purifying  
177 selection (Supplementary Information, (27)). We simulated lower  $N_e$  on the Neandertal lineage  
178 after its split from modern humans and accumulation of deleterious variants on both lineages  
179 across a grid of several relevant parameters (such as the time of the split between both populations  
180 or the amount of sequence under negative selection). For each combination of parameters, we then



181 calculated the ratio of fitnesses of average Neandertal and average modern Y chromosomes  
182 produced by the simulation, and traced the trajectory of introgressed modern human Y  
183 chromosomes in Neandertals over 100 ky following 5% admixture (Figures S8.1 and S8.2,  
184 Supplementary information).

185 We found that even a small reduction in fitness of Neandertal Y chromosomes compared  
186 to modern human Y chromosomes has a strong effect on the probability of a complete replacement  
187 by introgressed modern human Y chromosomes (Figure 3B). Specifically, even a 1% reduction in  
188 Neandertal Y chromosome fitness increases the probability of replacement after 20ky to ~25% and  
189 a 2% reduction in fitness increases this probability to ~50%. This fitness reduction measure is an  
190 aggregate over all linked deleterious mutations on the Y chromosome and integrates a number of  
191 biological parameters, only a subset of which we consider here (Figure S8.1 and S8.3).  
192 Importantly, we note that although we simulated introgression of Y chromosomes, the abstract  
193 measure of fitness reduction of a non-recombining, uniparental locus can also be generalized to  
194 the case of mtDNA introgression (Figure 3B).

195 These results show that a model of higher genetic load in Neandertals is compatible with  
196 an increased probability of replacement of Neandertal mtDNA and Y chromosomes with their  
197 introgressed modern human counterparts. Furthermore, given the crucial role of the Y  
198 chromosome in reproduction and fertility, and its haploid nature, it is possible that deleterious  
199 mutations or structural variants on the Y chromosome have a dramatically larger impact on fitness  
200 than we considered in our simulations (28).

## 201 **Conclusions**

202 Our results show that the Y chromosomes of late Neandertals represent an extinct lineage related  
203 to modern human Y chromosomes that introgressed into Neandertals some time between ~370 kya

204 and ~100 kya. The presence of this Y chromosome lineage in all late Neandertals makes it unlikely  
205 that genetic changes that accumulated in Neandertal and modern human Y chromosomes prior to  
206 the introgression lead to incompatibilities between these groups of humans. We predict that the  
207 ~400 ky old Sima de los Huesos individuals, who are early Neandertals but carry a Denisovan-like  
208 mtDNA (10, 11), should also carry a Y chromosome lineage more similar to Denisovans than to  
209 later Neandertals. Although complete replacement of mtDNA and Y chromosomes might seem  
210 surprising given that limited modern human gene flow has been detected in the genomes of late  
211 Neandertals (15, 21–23), mitochondrial-autosomal discrepancies are predicted by population  
212 genetic theory, and are relatively common during interspecific hybridization in the animal  
213 kingdom (29–31). Our simulations show that differences in genetic loads in uniparental loci  
214 between the two hybridizing populations is a plausible driver of this phenomenon.

215

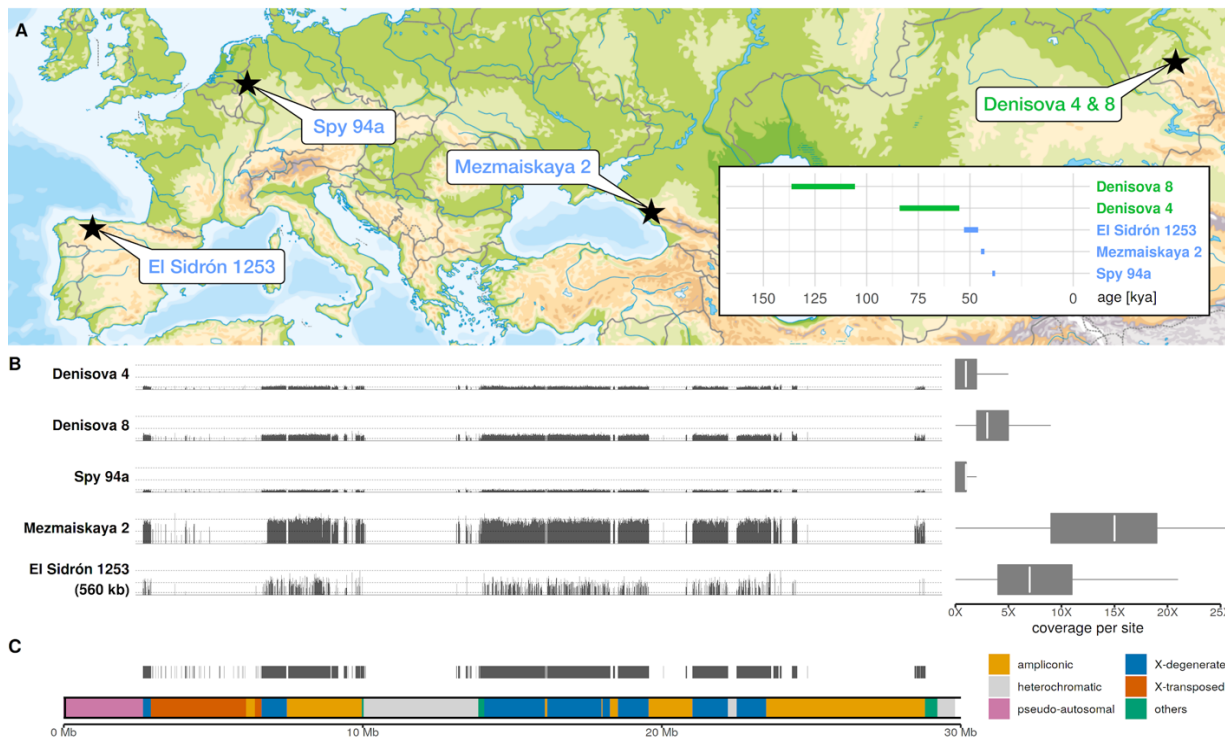

216  
217  
218

219 **Figure 1. Geographical locations, ages and sequencing coverage of the male archaic humans**

220 **in our study. (A)** Locations of archaeological sites where the five archaic human specimens have

221 been found. Estimates of the ages shown as an inset (14–16). **(B) Left** - Spatial distribution of

222 sequencing coverage for each archaic human Y chromosome along the ~6.9 Mb of capture target

223 regions. The heights of the thin vertical bars represent average coverage in each target region. The

224 chromosomal coordinates are aligned to match the Y chromosome structure depicted in panel C.

225 **Right** - Distribution of coverage across all target sites for each archaic Y chromosome on the left.

226 **(C)** Genomic structure of the portion of the human Y chromosome targeted for capture. Thin black

227 vertical lines show the position of individual target capture regions. The coordinates of Y

228 chromosome regions were taken from (32).

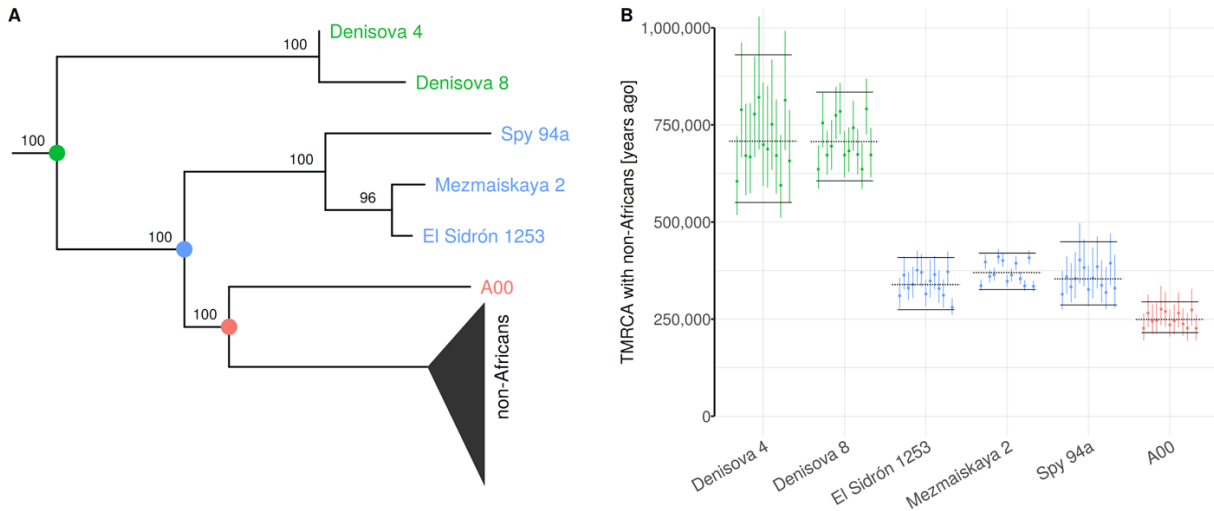

229  
230  
231

232 **Figure 2. Phylogenetic relationships between archaic and modern human Y chromosomes.**

233 **(A)** Neighbor-joining tree based on the alignment of Y chromosome genotype calls, excluding C-  
234 to-T and G-to-A polymorphisms to mitigate the effects of aDNA damage. Numbers next to the  
235 internal nodes show bootstrap support for the three major clades (green - Denisovans, blue -  
236 Neandertals, red – deeply divergent African lineage A00) based on 100 bootstrap replicates. The  
237 tree was rooted using a chimpanzee Y chromosome as the outgroup. We note that the terminal  
238 branch lengths are not informative about the ages of specimens due to differences in sequence  
239 quality (Figure 1A). **(B)** Distributions of the times to the most recent common ancestor (TMRCA)  
240 between Y chromosomes listed along the x-axis and a panel of 13 non-African Y chromosomes.  
241 Each dot represents a TMRCA estimate based on a single non-African Y chromosome, with error  
242 bars showing approximate 95% C.I. based on resampling of branch counts (Supplementary  
243 Information). Black horizontal lines show the mean TMRCA calculated across the full non-African  
244 panel (dotted lines) with bootstrap-based 95% C.I. (solid lines).

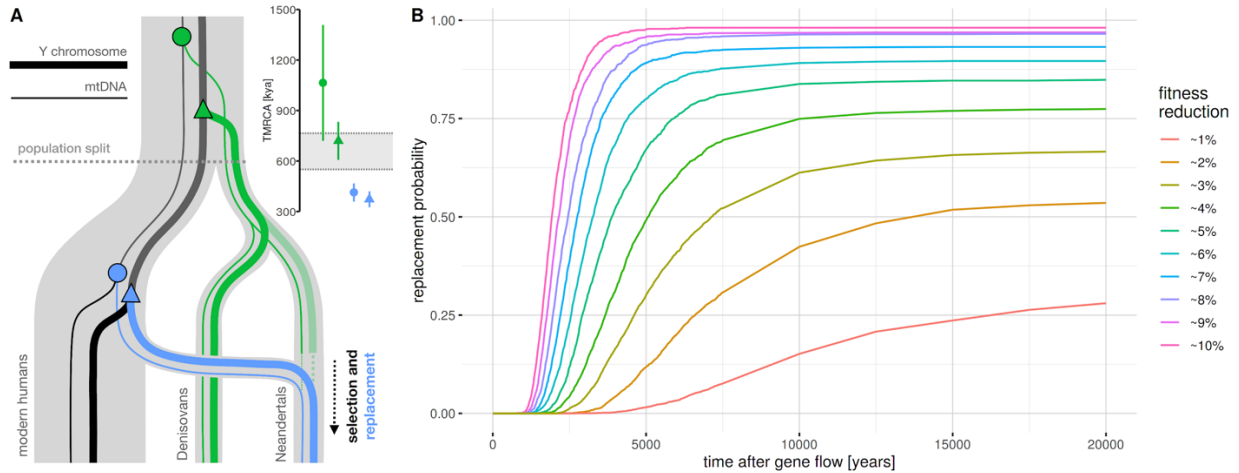

245

246

247 **Figure 3. Proposed model for the replacement of Neandertal Y chromosomes and mtDNA.**

248 **(A)** Schematic representation of the relationships between archaic and modern human mtDNA

249 (thin lines) and Y chromosomes (thick lines) based on current phylogenetic inferences, with the

250 hypothesized time-window for selection. The semi-transparent Neandertal lineage indicates an as

251 yet unsampled, hypothetical Y chromosome which was replaced by an early lineage related to

252 modern human Y chromosomes. Positions of relevant most recent common ancestors with modern

253 human lineages are shown for mtDNA (circle nodes) and Y chromosomes (triangle nodes). Inset

254 shows TMRCA estimates for the four nodes in the diagram: Y chromosome TMRCAs as estimated

255 by our study, mtDNA TMRCAs estimates from the literature (9, 10). The grey horizontal bar

256 highlights the 95% C.I. for the population split time between archaic and modern humans (8). **(B)**

257 Probability of replacement of a non-recombining, uniparental Neandertal locus as a function of

258 time after gene flow, assuming a given level of fitness burden relative to its modern human

259 counterpart. Trajectories are based on forward simulations across a grid of parameters (Figure

260 S8.1-S8.3, Supplementary Information). Modern human introgression was simulated in a single

261 pulse at 5%.

262

- 263 1. R. E. Green *et al.*, *Science* **328**, 710 (2010).
- 264 2. M. Meyer *et al.*, *Science* **338**, 222 (2012).
- 265 3. I. Lazaridis *et al.*, *Nature* **513**, 409 (2014).
- 266 4. Q. Fu *et al.*, *Nature* **534**, 200 (2016).
- 267 5. S. Lippold *et al.*, *Investig Genet* **5**, 13 (2014).
- 268 6. M. Karmin *et al.*, *Genome Research* **25**, 459 (2015).
- 269 7. I. Olalde *et al.*, *Science* **363**, 1230 (2019).
- 270 8. K. Prüfer *et al.*, *Nature* **505**, 43 (2014).
- 271 9. C. Posth *et al.*, *Nat Commun* **8**, 16046 (2017).
- 272 10. M. Meyer *et al.*, *Nature* **505**, 403 (2014).
- 273 11. M. Meyer *et al.*, *Nature* **531**, 504 (2016).
- 274 12. F. Mendez, G. Poznik, S. Castellano, C. Bustamante, *The American Journal of Human*  
275 *Genetics* **98**, 728 (2016).
- 276 13. S. Sawyer *et al.*, *Proc Natl Acad Sci U S A* **112**, 15696 (2015).
- 277 14. K. Douka *et al.*, *Nature* **565**, 640 (2019).
- 278 15. M. Hajdinjak *et al.*, *Nature* **555**, 652 (2018).
- 279 16. R. E. Wood *et al.*, *Archaeometry* **55**, 148 (2013).
- 280 17. S. Castellano *et al.*, *Proceedings of the National Academy of Sciences* **111**, 6666 (2014).
- 281 18. Q. Fu *et al.*, *Nature* **514**, 445 (2014).
- 282 19. S. Mallick *et al.*, *Nature* **538**, 201 (2016).
- 283 20. K. Prüfer *et al.*, *Science* **358**, 655 (2017).
- 284 21. M. J. Hubisz, A. L. Williams, A. Siepel, (2019).
- 285 22. L. Chen, A. B. Wolf, W. Fu, L. Li, J. M. Akey, *Cell* **180**, 677 (2020).
- 286 23. M. Kuhlwilm *et al.*, *Nature* **530**, 429 (2016).
- 287 24. J. F. Crow, M. Kimura, *An Introduction to Population Genetics Theory* 1970), pp. 591.
- 288 25. K. Harris, R. Nielsen, *Genetics* **203**, 881 (2016).
- 289 26. I. Juric, S. Aeschbacher, G. Coop, *PLoS Genet* **12**, e1006340 (2016).
- 290 27. B. C. Haller, P. W. Messer, *Molecular biology and evolution* **36**, 632 (2019).
- 291 28. S. Colaco, D. Modi, *Reproductive biology and endocrinology* **16**, 14 (2018).
- 292 29. J. W. Ballard, M. C. Whitlock, *Mol Ecol* **13**, 729 (2004).
- 293 30. T. Bonnet, R. Leblois, F. Rousset, P.-A. Crochet, *Evolution* **71**, 2140 (2017).
- 294 31. F. A. Seixas, P. Boursot, J. Melo-Ferreira, *Genome Biol* **19**, 91 (2018).
- 295 32. L. Skov, P. G. C. Danish, M. H. Schierup, *PLoS Genet* **13**, e1006834 (2017).

296  
297

## 298 **Acknowledgements**

299 We would like to thank Svante Pääbo, Mark Stoneking, Benjamin Peter, Montgomery Slatkin,  
300 Laurits Skov and Elena Zavala for helpful discussions and comments on the manuscript. Q.F. was  
301 supported by funding from the Chinese Academy of Sciences (XDB26000000), and the National  
302 Natural Science Foundation of China (91731303, 41925009,41630102). A.R. was funded by  
303 Spanish government (MICINN/FEDER), grant number CGL2016-75109-P. The reassessment of

304 the Spy collection by H.R., I.C. and P.S. was supported by the Belgian Science Policy Office  
305 (BELSPO 2004-2007, MO/36/0112). M.S., M.K. and A.D. were supported by the Russian  
306 Foundation for Basic Research (RFBR 17-29-04206). This study was funded by the Max Planck  
307 Society and the European Research Council (grant agreement number 694707). M.P., J.K.  
308 analyzed data. M.H., Q.F., E.E. performed laboratory experiments. H.R., I.C., P.S., L.V.G.,  
309 V.B.D., C.L.-F., M.d.I.R., A.R., M.V.S., M.B.K., A.P.D. provided samples. B.V., M.M., J.K.  
310 supervised the project. M.P., J.K. wrote and edited the manuscript with input from all co-authors.

311

312 Data and materials availability: All sequence data are available from the European Nucleotide  
313 Archive under accession numbers xxx (*Mezmaiskaya 2*), xxx (*Spy 94a*), xxx (*Denisova 4*), xxx  
314 (*Denisova 8*) and xxx (*El Sidrón 1253*).

315

316 Complete source code for data processing and simulations, as well as Jupyter notebooks with all  
317 analyses and results can be found at <https://github.com/bodkan/archaic-ychr>. All data is available  
318 from <https://bioinf.eva.mpg.de/archaic-ychr>.

1

2

# Supplementary Information

3

4

5

6

## **The evolutionary history of Neandertal**

7

## **and Denisovan Y chromosomes**

8

9

10

11 Martin Petr, Mateja Hajdinjak, Qiaomei Fu, Elena Essel, H el ene Rougier, Isabelle

12 Crevecoeur, Patrick Semal, Liubov V. Golovanova, Vladimir B. Doronichev, Carles

13 Lalueza-Fox, Marco de la Rasilla, Antonio Rosas, Michael V. Shunkov, Maxim B. Kozlikin,

14 Anatoli P. Derevianko, Benjamin Vernot, Matthias Meyer, Janet Kelso

15

16



17 Complete source code for data processing and simulations, as well as Jupyter notebooks  
18 with all analyses can be found at <https://github.com/bodkan/archaic-ychr>. All data is  
19 available from <https://bioinf.eva.mpg.de/archaic-ychr>.

20

|    |                                                                   |    |
|----|-------------------------------------------------------------------|----|
| 21 | 1. Y chromosome DNA capture design                                | 3  |
| 22 | 2. Sampling, DNA extraction, library preparation and capture      | 6  |
| 23 | 3. Sequencing and data processing                                 | 8  |
| 24 | 3.1. Newly generated archaic human Y chromosomes                  | 8  |
| 25 | 3.2. Previously published archaic human sequences                 | 8  |
| 26 | 3.3. Previously published modern human sequences                  | 9  |
| 27 | 4. Coverage and measures of ancient DNA quality                   | 10 |
| 28 | 4.1. Coverage                                                     | 10 |
| 29 | 4.2. Patterns of ancient DNA damage                               | 14 |
| 30 | 4.3. Read length distribution                                     | 18 |
| 31 | 4.4. Modern human contamination                                   | 21 |
| 32 | 4.5. Capture bias and reference (mapping) bias                    | 25 |
| 33 | 5. Genotype calling                                               | 30 |
| 34 | 5.1. Consensus genotype calling                                   | 30 |
| 35 | 5.2. Genotype calling using snpAD                                 | 31 |
| 36 | 5.3. Minimum coverage filtering                                   | 33 |
| 37 | 6. Inferring phylogenetic relationships                           | 45 |
| 38 | 7. Estimating the TMRCA of archaic and modern human Y chromosomes | 47 |
| 39 | 7.1. TMRCA of Africans and non-Africans $TMRCA_{AFR}$             | 48 |
| 40 | 7.2. Archaic human-modern human TMRCA ( $TMRCA_{archaic}$ )       | 55 |
| 41 | 7.3. TMRCA of <i>Mezmaiskaya 2</i> and <i>Spy 94a</i>             | 72 |
| 42 | 7.4. Confidence intervals                                         | 77 |
| 43 | 8. Simulations of introgression under purifying selection         | 78 |

44

45

## 46 1. Y chromosome DNA capture design

47 To design a set of DNA capture probes, we identified regions of the human Y  
48 chromosome that are uniquely mappable with short sequence reads. Starting from the  
49 entire human Y chromosome reference sequence (version *hg19*), we removed regions  
50 that overlap those found by the Tandem Repeats Finder (1) and those identified by a  
51 previously described mappability track as regions that may result in ambiguous alignment  
52 of short reads (so called “*map35\_50%*” filter, (2)). We then removed any regions that were  
53 shorter than 99 bp of continuous sequence. In total, this process yielded 6,912,728 bp  
54 (~6.9 Mb) of the Y chromosome suitable for use as an ancient DNA capture target.

55 We designed 52 bp oligonucleotide probes by tiling the identified 6.9 Mb of target  
56 sequence with 52 bp fragments in steps of 3 bp. This resulted in 2,049,846 individual  
57 oligonucleotide probes. To verify that the probe sequences are unique genome-wide, we  
58 aligned each probe to the complete *hg19* reference sequence and confirmed that they all  
59 aligned only to their expected position on the Y chromosome with mapping quality of at  
60 least 30. The files containing the coordinates of target regions, as well as the coordinates  
61 and sequences of all capture probes, including 8 bp adapters, are freely available from  
62 <https://bioinf.eva.mpg.de/archaic-ychr>.

63  
64 Following the approach taken by Fu *et al.* (3), 60 bp oligonucleotides containing the probe  
65 sequences as well as an 8 bp universal linker sequence were synthesized on three One  
66 Million Feature Arrays (Agilent Technologies), converted into probe libraries and  
67 amplified. Single-stranded biotinylated DNA probes were generated using a linear  
68 amplification reaction with a single biotinylated primer (3).

69

70 We also co-analyzed data from two additional captures carried out previously: (i) ~120 kb  
71 of Y chromosome sequence from the *El Sidrón 1253* Neandertal that was targeted as a  
72 part of an exome capture study (4) and has been analyzed previously (5), and (ii) a larger  
73 amount of data (~560 kb) from the same *El Sidrón 1253* individual which we captured  
74 using probes designed for a previously published set of Y chromosome target regions (6).  
75 The file containing the coordinates of target regions and coordinates and sequences of  
76 all capture probes, including 8 bp adapters, is freely available from  
77 <http://bioinf.eva.mpg.de/archaic-ychr>.

78

79 The features of our new capture design, as well as a comparison with the Y chromosome  
80 target regions on the exome capture (4, 5) and the ~560 kb capture (6) are reported in  
81 Table S1.1.

82

83

84

| target              | total [bp] | # of regions | min [bp] | median [bp] | mean [bp] | max [bp] |
|---------------------|------------|--------------|----------|-------------|-----------|----------|
| entire mappable Y   | 6,912,728  | 15,903       | 99.0     | 240.0       | 434.7     | 9,425.0  |
| ~560 kb capture (*) | 573,657    | 1,251        | 60.0     | 151.0       | 458.6     | 3899.0   |
| ~560 kb capture     | 556,259    | 1,779        | 1.0      | 119.0       | 312.7     | 2,829.0  |
| exome subset        | 118,643    | 2,519        | 1.0      | 3.0         | 47.1      | 1,257.0  |

85

86 **Table S1.1. Characteristics of the three sets of Y chromosome capture targets**

87 **analyzed in our study.** “*Exome subset*” refers to a Y chromosome subset of the exome

88 capture sequence generated by Castellano *et al.* and analyzed by Mendez *et al.* (called

89 “filter 1”) (4, 5), “~560 kb capture” refers to target regions originally designed for studying

90 present-day human Y chromosome variation (6), star (\*) signifies statistics before

91 intersecting the original set of target regions with the “*map35\_50%*” filter (2), “*entire*

92 *mappable Y*” represents capture regions targeting the entire mappable portion of the

93 human Y chromosome designed for our study.

94

95

96

## 97 2. Sampling, DNA extraction, library preparation and capture

98 Samples of 15.4 mg and 14.9 mg of tooth powder from *Denisova 8* were used for DNA  
99 extraction using a silica-based method (7) with modifications as described in (8). Ten mg  
100 of the tooth powder from *Denisova 4* were used for a silica-based DNA extraction that is  
101 optimized for the recovery of extremely short DNA fragments (9). Four samples of  
102 Mezmaiskaya 2 bone powder, ranging between 3.2 mg and 17.5 mg were treated with  
103 0.5% hypochlorite solution to minimize microbial and present-day human DNA  
104 contamination (8) before DNA was extracted either manually (7) or on an automated liquid  
105 handling platform (Bravo NGS workstation B, Agilent Technologies) (10). See Table S2.1  
106 for an overview of the DNA extracts and libraries generated in this and previous studies  
107 and the experimental conditions used.

108

109 In addition to existing single-stranded libraries for *Spy94a* and *Mezmaiskaya 2*  
110 (11), new single-stranded DNA libraries for *Mezmaiskaya 2*, *Denisova 4* and *Denisova 8*  
111 were prepared from DNA extracts made for this study (Table S2.1). Two of the single-  
112 stranded DNA libraries for *Denisova 8* (A9461 and A9462) were prepared manually using  
113 10  $\mu$ L of each extract as an input (12). All other single-stranded DNA libraries were  
114 prepared using either 10  $\mu$ L or 30  $\mu$ L of extract as input (13) on an automated liquid  
115 handling platform (Bravo NGS workstation B, Agilent Technologies) (14). All new libraries  
116 were prepared without UDG treatment (non-UDG treated libraries).

117 In order to monitor the efficiency of library preparation, a control oligonucleotide  
118 was spiked into each aliquot of a DNA extract used for library preparation (9). Quantitative  
119 PCR was used to determine the total number of unique library molecules and the number

120 of oligonucleotides that were successfully converted to library molecules (9, 13) (Table  
121 S2.1). Each library was tagged with two unique index sequences (15) and amplified into  
122 plateau with AccuPrime Pfx DNA polymerase (Life Technologies) (16) according to the  
123 modifications detailed in (8). Fifty microlitres (half of the total volume) of each of the  
124 amplified libraries were purified on an automated liquid handling platform (Bravo NGS  
125 workstation B, Agilent Technologies) using SPRI beads (14). A NanoDrop 1000  
126 Spectrophotometer (NanoDrop Technologies) was used to determine the concentrations  
127 of the purified libraries.

128 In solution hybridization capture of the Y chromosome was performed in two  
129 successive rounds of capture as described previously (3), using the Y chromosome probe  
130 set designed in the present study and single-stranded libraries prepared in this and  
131 previous studies. In addition, we performed hybridization capture on 40 double-stranded  
132 libraries prepared in a previous study from the *El Sidrón 1253* Neandertal (see Table S1  
133 in (4)) using a smaller ~560 kb Y chromosomal probe set that was also designed  
134 previously (6).

135

## 136 3. Sequencing and data processing

### 137 3.1. Newly generated archaic human Y chromosomes

138 All captured libraries were sequenced on the Illumina HiSeq 2500 platform in a double  
139 index configuration (2x76 cycles) (15), and base calling was done using Bustard  
140 (Illumina). Adapters were trimmed and overlapping paired-end reads were merged using  
141 *leeHom* (17). The Burrows-Wheeler Aligner (BWA) (18) with parameters adjusted for  
142 alignment of ancient DNA (“-n 0.01 -o 2 -l 16500”) was used to align the sequenced  
143 fragments to the human reference genome version hg19/GRCh37. Only reads showing  
144 perfect matches to the expected index sequence combinations were retained for  
145 subsequent analyses. PCR duplicates were removed using the *bam-rmdup* program,  
146 which can be downloaded in source form from <https://github.com/mpieva/biohazard-tools>.  
147 DNA fragments that were at least 35 base pairs (bp) long and had a mapping quality of  
148 at least 25 were extracted using *samtools* (19). Each processed and filtered BAM file (one  
149 for each archaic human Y chromosome) was intersected with a BED file of the appropriate  
150 Y chromosome target (full ~6.9 Mb capture, ~120 kb exome capture or ~560 kb capture).

### 151 3.2. Previously published archaic human sequences

152 In addition to the new capture data generated here, we analyzed previously published  
153 shotgun sequences of the *Spy 94a* and *Mezmaiskaya 2* individuals (11), as well as exome  
154 capture data of the *El Sidrón 1253* individual (4). For comparisons to our capture data,  
155 we generated BAM files for *Spy 94a* and *Mezmaiskaya 2* shotgun sequences and the *El*  
156 *Sidrón 1253* exome capture by filtering the published data to minimum read length of 35

157 bp and mapping quality 25, keeping only sequences aligned to the set of appropriate  
158 target capture regions (~6.9 Mb capture target for *Spy 94a* and *Mezmaiskaya 2*, ~118 kb  
159 capture target for *El Sidrón 1253*, *Table S1.1*).

### 160 3.3. Previously published modern human sequences

161 For comparisons with modern human Y chromosomes, we downloaded 19 BAM files of  
162 African and non-African Y chromosomes published by the Simons Genome Diversity  
163 Project (SGDP) (20), two Y chromosomes representing the African A00 lineage (21) and  
164 the Y chromosome of a ~45,000-year-old hunter-gatherer *Ust'-Ishim* (22). Because the  
165 two individuals from which the A00 Y chromosomes were sequenced are closely and  
166 each is only about half of the coverage of the other modern human Y chromosomes  
167 (Table S4.3), we followed the approach of the original A00 publication and merged the  
168 two A00 Y chromosomes into a single BAM file (21, 23). All individual BAM files (one for  
169 each modern human Y chromosome) were then filtered to retain reads with a minimum  
170 length of 35 bp and mapping quality of at least 25, and alignment to the appropriate set  
171 of Y chromosome target capture regions (Table S1.1).

172



## 173 4. Coverage and measures of ancient DNA quality

### 174 4.1. Coverage

175 Sequencing coverage was calculated using *bedtools* (24). To get coverage for a given  
176 individual in a given set of target regions, we ran the command `bedtools coverage -`  
177 `a <BED> -b <BAM> -d`, which reports the coverage for each position in a BED file in  
178 the last column of its output. We removed sites with coverage higher than the 98%  
179 quantile of the entire distribution in each of the individuals in our study. Figure 1B (spatial  
180 distribution and overall distribution) and Tables S4.1, S4.2 and S4.3 summarise the  
181 values of coverage at sites with less than 98% quantile of the overall distribution in a  
182 sample.

183

| <b>individual</b> | <b>mean coverage</b> | <b>target</b> |
|-------------------|----------------------|---------------|
| Spy 94a           | 0.8                  | 6.9 Mb        |
| Denisova 4        | 1.4                  | 6.9 Mb        |
| Denisova 8        | 3.5                  | 6.9 Mb        |
| El Sidrón 1253    | 7.9                  | 560 kb        |
| Mezmaiskaya 2     | 14.3                 | 6.9 Mb        |

184

185 **Table S4.1. Mean coverage of archaic human Y chromosomes sequenced in this**

186 **study.** Sites with coverage higher than 98% quantile of the entire distribution were

187 excluded from the calculation.

188

189

| name                     | mean coverage | target | study                                                        |
|--------------------------|---------------|--------|--------------------------------------------------------------|
| Spy 94a (shotgun)        | 0.5           | 6.9 Mb | Hajdinjak <i>et al.</i> , 2018                               |
| Mezmaiskaya 2 (shotgun)  | 0.8           | 6.9 Mb | Hajdinjak <i>et al.</i> , 2018                               |
| El Sidrón 1253 (capture) | 3.2           | 118 kb | Castellano <i>et al.</i> , 2014, Mendez <i>et al.</i> , 2016 |

190

191 **Table S4.2. Mean coverage of previously published archaic human Y chromosome**

192 **sequences.** The coverage reported for *Spy 94a* and *Mezmaiskaya 2* shotgun sequence

193 data is that of sequences overlapping the 6.9 Mb Y capture regions. The *El Sidrón 1253*

194 libraries were captured using an exome capture array (4, 5) and the coverage reported

195 here is for the ~118 kb exome target capture regions. For each individual, sites with

196 coverage higher than 98% quantile of the entire distribution were excluded from the

197 calculation.

198

199

| name              | mean coverage | target | study                        |
|-------------------|---------------|--------|------------------------------|
| A00-1             | 8.8           | 6.9 Mb | Karmin <i>et al.</i> , 2015  |
| A00-2             | 12.0          | 6.9 Mb | Karmin <i>et al.</i> , 2015  |
| S_Mandenka-1      | 16.3          | 6.9 Mb | Mallick <i>et al.</i> , 2016 |
| S_Yoruba-2        | 17.0          | 6.9 Mb | Mallick <i>et al.</i> , 2016 |
| S_Finnish-2       | 17.0          | 6.9 Mb | Mallick <i>et al.</i> , 2016 |
| S_Punjabi-1       | 17.1          | 6.9 Mb | Mallick <i>et al.</i> , 2016 |
| S_Sardinian-1     | 18.1          | 6.9 Mb | Mallick <i>et al.</i> , 2016 |
| S_Dai-2           | 19.8          | 6.9 Mb | Mallick <i>et al.</i> , 2016 |
| S_Gambian-1       | 20.1          | 6.9 Mb | Mallick <i>et al.</i> , 2016 |
| Ust'-Ishim        | 20.1          | 6.9 Mb | Fu <i>et al.</i> , 2014      |
| S_Mbuti-1         | 20.3          | 6.9 Mb | Mallick <i>et al.</i> , 2016 |
| S_Dinka-1         | 20.8          | 6.9 Mb | Mallick <i>et al.</i> , 2016 |
| S_Han-2           | 20.8          | 6.9 Mb | Mallick <i>et al.</i> , 2016 |
| A00               | 20.9          | 6.9 Mb | merged A00-1 and A00-2       |
| S_BedouinB-1      | 21.7          | 6.9 Mb | Mallick <i>et al.</i> , 2016 |
| S_French-1        | 21.9          | 6.9 Mb | Mallick <i>et al.</i> , 2016 |
| S_Karitiana-1     | 22.2          | 6.9 Mb | Mallick <i>et al.</i> , 2016 |
| S_Turkish-1       | 22.5          | 6.9 Mb | Mallick <i>et al.</i> , 2016 |
| S_Saami-2         | 22.6          | 6.9 Mb | Mallick <i>et al.</i> , 2016 |
| S_Ju_hoan_North-1 | 22.7          | 6.9 Mb | Mallick <i>et al.</i> , 2016 |
| S_Papuan-2        | 23.2          | 6.9 Mb | Mallick <i>et al.</i> , 2016 |
| S_Thai-1          | 25.1          | 6.9 Mb | Mallick <i>et al.</i> , 2016 |
| S_Burmese-1       | 29.2          | 6.9 Mb | Mallick <i>et al.</i> , 2016 |

200

201 **Table S4.3. Mean coverage of modern human Y chromosomes in capture target**

202 **regions.** Coverage is reported using sequences within the 6.9 Mb target capture regions.

203 For each individual, sites with coverage higher than 98% quantile of the entire distribution

204 were excluded from the calculation.

205

206

## 207 4.2. Patterns of ancient DNA damage

208 To check for the presence of genuine ancient DNA sequences, we looked for an  
209 increased rate of deamination-induced substitutions, an important signature of ancient  
210 DNA damage (25). We counted substitution frequencies for each individual BAM file (one  
211 BAM file per individual Y chromosome) and found that molecules from single-stranded  
212 libraries that were not treated by uracil-DNA glycosylase (UDG) enzyme (those from *Spy*  
213 *94a*, *Mezmaiskaya 2*, *Denisova 4* and *Denisova 8*) show highly elevated frequencies of  
214 C-to-T substitutions towards the ends of molecules, as well as C-to-T substitutions  
215 throughout the molecules (Figure S4.1). As is characteristic of double-stranded libraries  
216 treated with the UDG enzyme, the deamination substitution frequency signal in the  
217 capture data from *El Sidrón 1253* UDG-treated libraries is much less pronounced and  
218 present only at the terminal positions of DNA fragments as both C-to-T and G-to-A  
219 substitutions (Figure S4.2). For comparison, Figure S4.3 shows DNA damage patterns  
220 from previously published shotgun sequences of *Spy 94a* and *Mezmaiskaya 2* individuals.

221

222

### Denisova 4

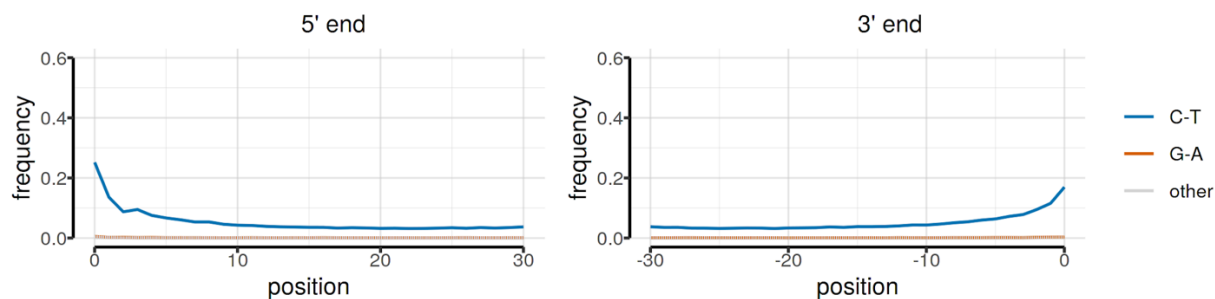

### Denisova 8

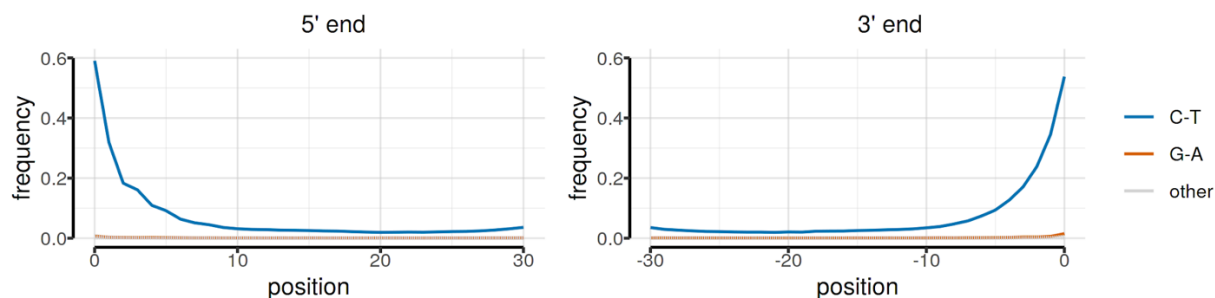

### Mezmaiskaya 2

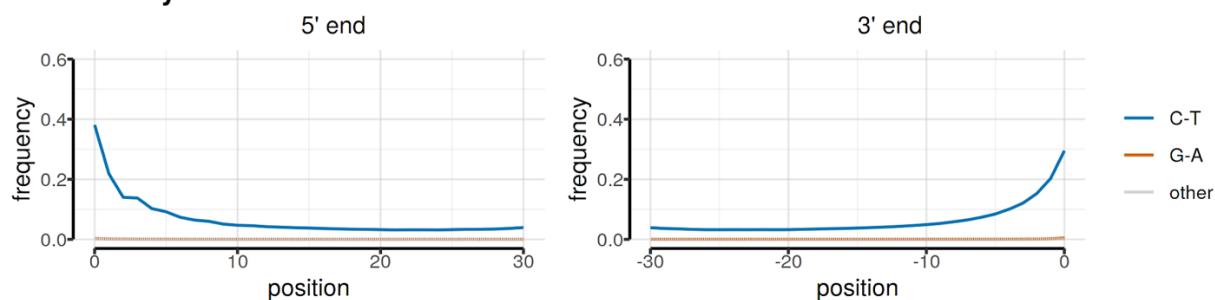

### Spy 94a

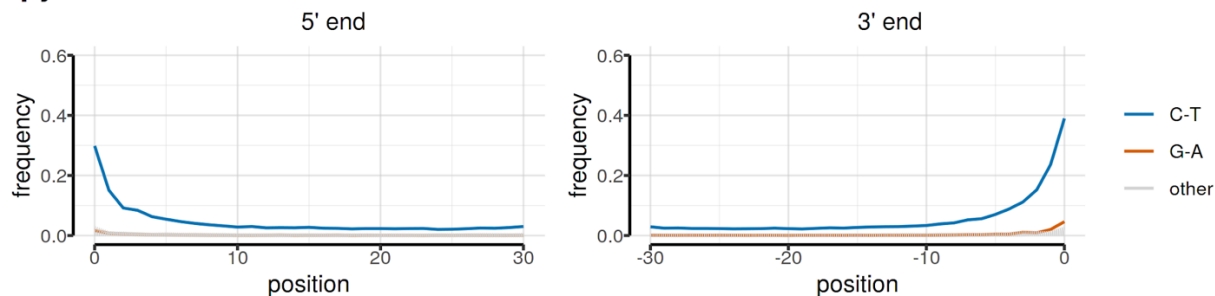

223

224 **Figure S4.1. Patterns of ancient DNA damage in non-UDG-treated sequences**  
225 **captured using the 6.9 Mb capture.**

226

227

228

### El Sidrón 1253 (560 kb)

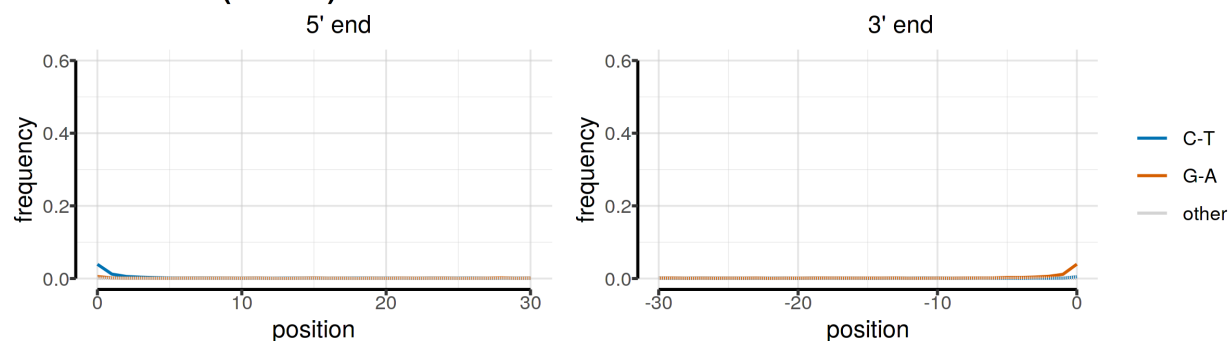

### El Sidrón 1253 (118 kb)

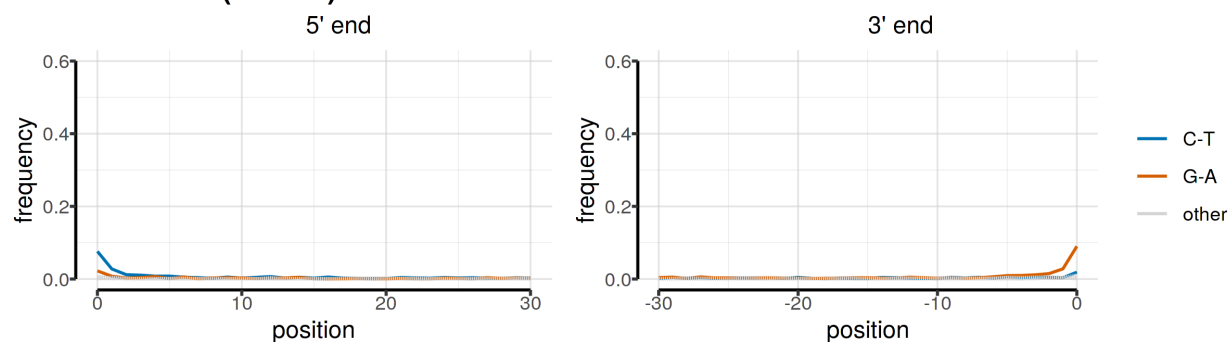

229

230 **Figure S4.2. Patterns of ancient DNA damage in UDG-treated sequences from the**

231 ***El Sidrón 1253* individual. Top row shows deamination patterns in the 560 kb capture**

232 **generated for our study (SI 1), bottom row shows deamination patterns in previously**

233 **published Y chromosome sequences from the exome capture of the same individual (4,**

234 **5).**

235

236

### Spy 94a (shotgun)

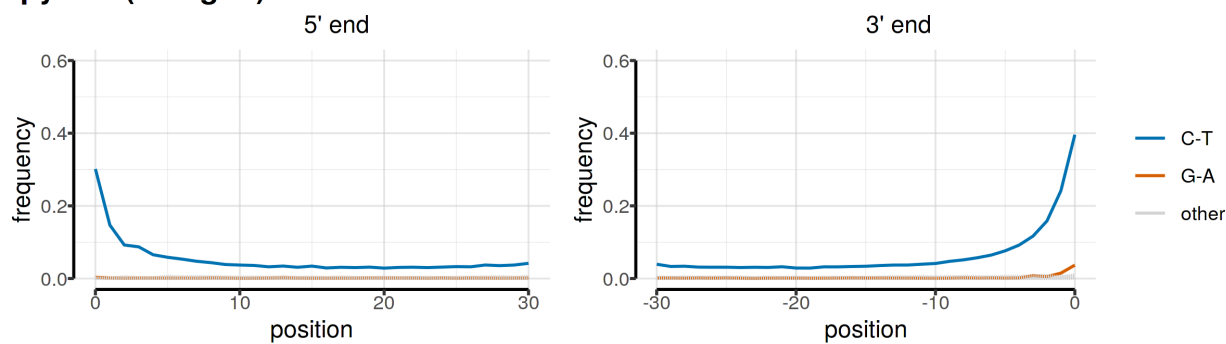

### Mezmaiskaya 2 (shotgun)

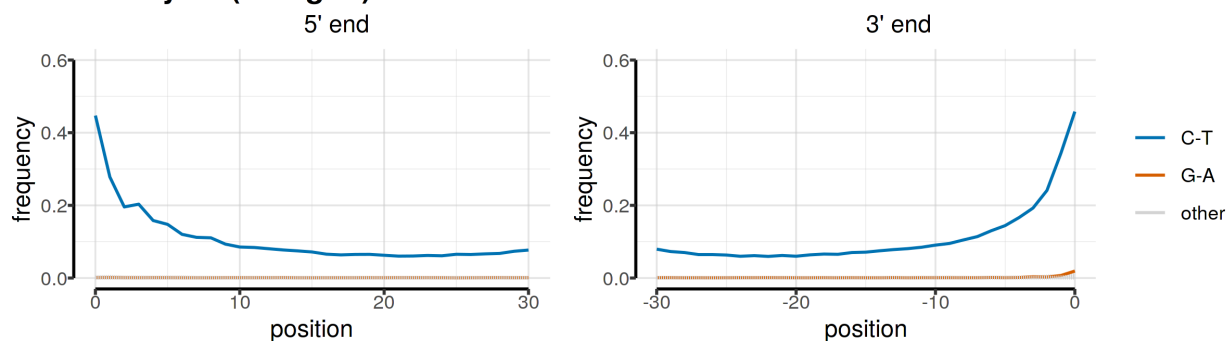

237

238 **Figure S4.3. Patterns of ancient DNA damage in non-UDG-treated shotgun**  
239 **sequences of *Spy 94a* and *Mezmaiskaya 2*.** Figures show results from previously  
240 published sequence data (11), using sequences within the 6.9 Mb Y chromosome capture  
241 target.

242

243

244



245           4.3.   Read length distribution

246   We calculated read lengths for each final processed BAM file using *samtools view* and  
247   *awk*. As expected for ancient sequences, archaic human Y chromosome fragments are  
248   very short (Figure S4.3, Table S4.4). We note that *Denisova 8* shows an even more  
249   extreme reduction in read length compared to the other captured archaic human Y  
250   chromosomes (Figure S4.3, Table 4.4), consistent with the fact that the *Denisova 8*  
251   specimen is possibly nearly twice as old as the other archaic humans in our study (Figure  
252   1A).

253

254

255

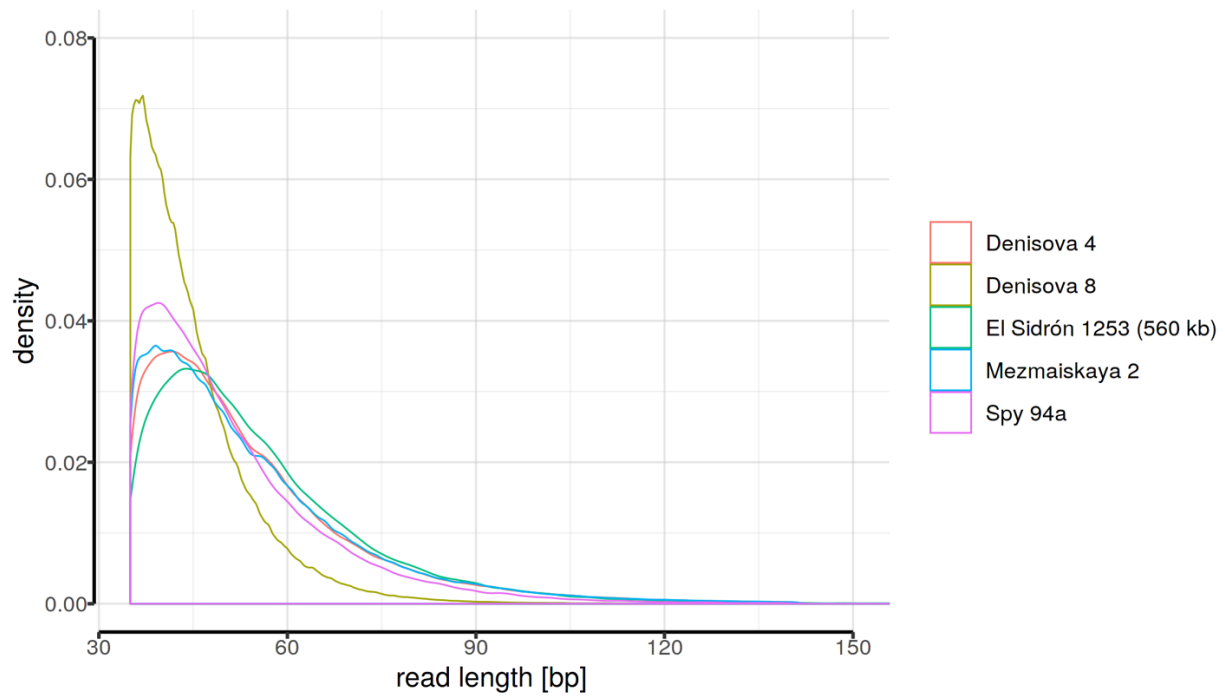

256

257 **Figure S4.3. Distributions of read lengths calculated using sequences within the**

258 **6.9 Mb target regions.**

259

260

| <b>individual</b>       | <b>mean [bp]</b> | <b>median [bp]</b> |
|-------------------------|------------------|--------------------|
| Denisova 8              | 44.8             | 42                 |
| Spy 94a                 | 51.2             | 47                 |
| Mezmaiskaya 2           | 54.1             | 49                 |
| Denisova 4              | 54.1             | 50                 |
| El Sidrón 1253 (560 kb) | 55.3             | 51                 |

261

262 **Table S4.4. Mean and median values of read length distributions in Figure S4.3.**

263

264

#### 265 4.4. Modern human contamination

266 Our consensus-based genotype calling strategy (described in SI 5) is designed to remove  
267 the effect of modern human contamination under the assumption that contaminant reads  
268 at a given position never represent more than 90% of the total number of reads. To  
269 validate that this approach achieves the desired effect, we assessed the frequency of  
270 modern human-derived SNPs at positions informative about modern human  
271 contamination in the final archaic human Y chromosome genotype calls.

272 To define these informative positions, we used genotypes of present-day human  
273 Y chromosomes and identified ancestral states by determining which sites carry the same  
274 allele in chimpanzee and two present-day African lineages *A00* and *S\_Ju\_hoan\_North-1*  
275 (20, 21) (red branches in Figure S4.4). We then further restricted these sites to those in  
276 which a different allele is observed in all 13 non-African individuals from the SGDP panel  
277 (20). These represent alleles derived on the non-African Y chromosome lineage (blue  
278 branches in Figure S4.4). This conditioning led to a total of 268 informative positions.  
279 Given that all archaic human Y chromosomes are expected to carry the ancestral state  
280 at these sites because they all fall basal to modern human Y chromosomes (Figure 2A),  
281 observing a derived allele at any of these informative sites implies the presence of a  
282 modern human contaminant allele, double mutation or an erroneous SNP call. We note  
283 that although the 13 non-African Y chromosomes that we used to define the potential  
284 ‘contaminant-derived states’ may not represent the true contaminant population, the  
285 contaminating population would still share the same derived states due to the non-  
286 recombining nature of human Y chromosomes.

287           Using this set of 268 informative positions, we found that the five archaic human Y  
288 chromosomes carry the ancestral state at all informative positions except for a single  
289 position in the *Spy 94a* individual which shows a derived allele out of the total 16  
290 informative sites available (Table S4.5). This shows that the consensus genotype calling  
291 method is efficient in mitigating the effect of modern human contaminant reads on the  
292 final set of Y chromosome genotype calls.  
293

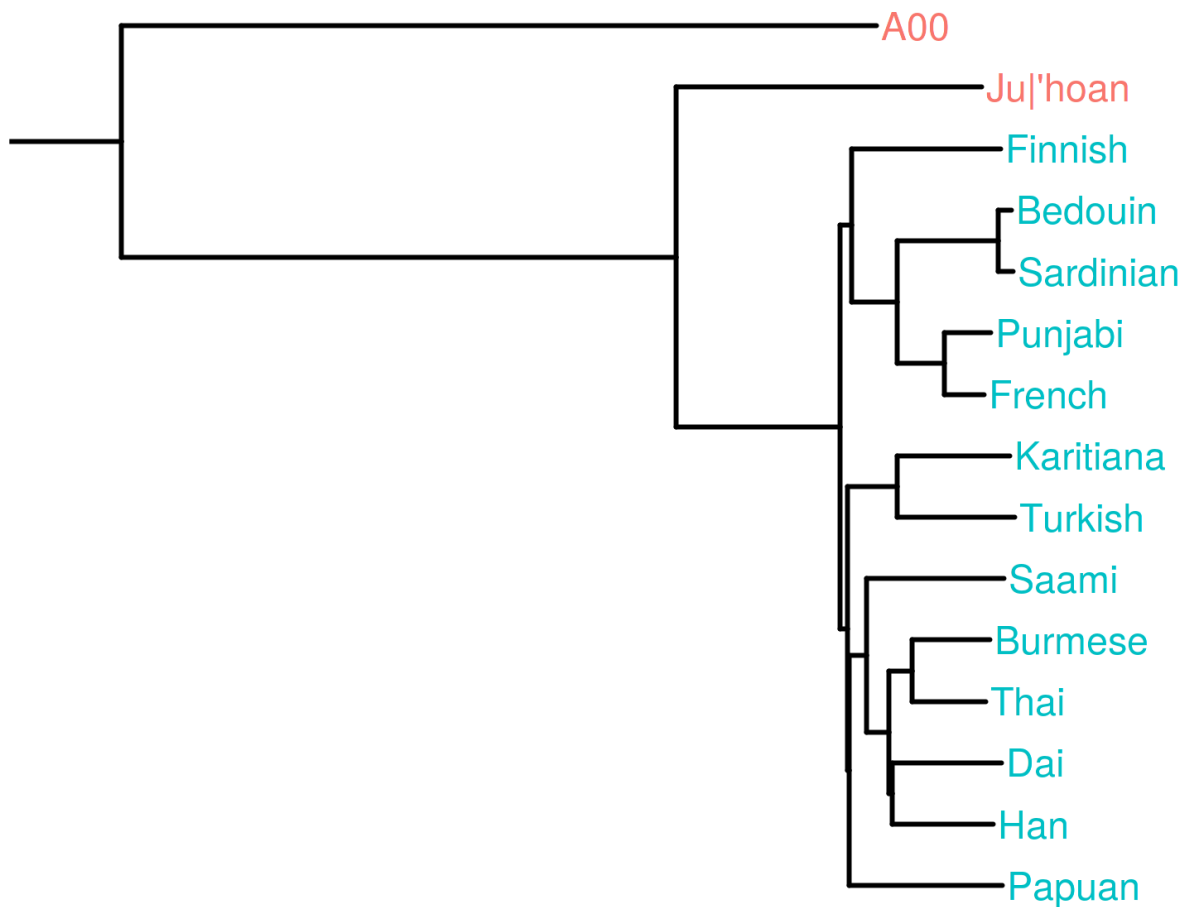

294

295 **Figure S4.4. Phylogenetic tree demonstrating the definition of positions**

296 **informative about modern human contamination.** Red branches represent lineages

297 which we required to carry one state (together with the chimpanzee) at positions where

298 the blue lineages carry a different state. Therefore, red branches represent the ancestral

299 states and blue branches represent the derived state. The tree was rooted with a

300 chimpanzee Y chromosome as an outgroup (cropped for plotting purposes).

301

| <b>individual</b>       | <b>ancestral count</b> | <b>derived count</b> | <b>total</b> | <b>derived/total</b> |
|-------------------------|------------------------|----------------------|--------------|----------------------|
| Spy 94a                 | 15                     | 1                    | 16           | 0.0625               |
| Mezmaiskaya 2           | 189                    | 0                    | 189          | 0.0000               |
| Denisova 4              | 14                     | 0                    | 14           | 0.0000               |
| Denisova 8              | 90                     | 0                    | 90           | 0.0000               |
| El Sidrón 1253 (560 kb) | 29                     | 0                    | 29           | 0.0000               |

302

303

304 **Table S4.5. Counts and proportions of potential ‘contaminant-derived’ non-African**

305 **alleles in all archaic human Y chromosomes.**

306

#### 307 4.5. Capture bias and reference (mapping) bias

308 Because the probes we designed for Y chromosome DNA enrichment are based on the  
309 human reference genome sequence (SI 1), we were concerned about the effect of  
310 capture bias on our inferences, specifically on the observed differences in divergence  
311 times between Denisovan and Neandertal Y chromosomes with respect to present-day  
312 humans (Figure 2). An earlier study of reference bias in published aDNA data sets has  
313 found minor but significant allelic imbalances at heterozygous sites from a baseline  
314 expectation of 50% ratio between reference and alternative alleles (26). Because this  
315 approach is not applicable for haploid Y chromosomes, we instead looked for departures  
316 of the observed number of sites without any genomic coverage from the theoretical  
317 expectation.

318 To build an intuition about this expectation, let's first consider a case of a truly  
319 random distribution of sequencing reads in a complete absence of capture or reference  
320 bias. In such a situation, the count of reads observed at any site can be modeled as a  
321 random variable which follows a Poisson distribution with a parameter  $\lambda$ , where  $\lambda$   
322 represents the average coverage observed across all sites. In a mathematical notation,  
323 letting  $X$  be this count of reads:  $X \sim Poisson(\lambda)$ . Then, given some value of  $\lambda$ , the  
324 expected proportion of sites that are not covered by any sequencing reads can be  
325 expressed as  $Poisson(X = 0, \lambda)$ , i.e. as the probability of observing zero reads at any site  
326 given the overall average coverage of  $\lambda$ . As an example, assuming 1-fold sequencing  
327 coverage we would expect to see  $Poisson(X = 0, \lambda = 1) = 0.3678794 \sim 37\%$  of the target  
328 sites not to be covered by any read at all, just by random chance. Importantly, however,  
329 capture bias or reference bias will manifest by some regions of the genome being



330 underrepresented in terms of captured molecules or mapped reads. Therefore, the  
331 presence and magnitude of this bias in a given DNA enrichment experiment can be  
332 detected by estimating the difference between the proportion of sites without any  
333 sequencing coverage from the theoretical Poisson expectation.

334         The results, shown in Figure S4.5 and Table S4.6, demonstrate that there is both  
335 reference and capture bias in our data and offers several interesting insights. First, we  
336 see a comparable effect of bias in all capture data (4-6% departure from the theoretical  
337 Poisson expectation) regardless of which capture array was used for the enrichment  
338 procedure (i.e., the full 6.9 Mb capture array, the 560 kb capture array or the exome  
339 capture array, Figure S4.5). Furthermore, comparisons of capture and shotgun  
340 sequences of *Spy 94a* and *Mezmaiskaya 2* show that the majority of bias must be due to  
341 the capture procedure itself (i.e. failure to capture molecules). This is because the  
342 underlying true biological divergences of *Spy 94a* and *Mezmaiskaya 2* to the reference  
343 genome (which cause a failure to map reads due to an increased number of substitutions  
344 – i.e., a reference bias) must be the same for both capture and shotgun sequences from  
345 these individuals. Crucially, however, despite the differences in bias between capture and  
346 shotgun sequences, both datasets lead to the same estimates of TMRCA with present-  
347 day human Y chromosomes (Figure S7.11). Furthermore, although we see dramatically  
348 different phylogenetic relationships of Denisovan and Neandertal Y chromosomes with  
349 respect to modern humans (Figure 2A), both groups of archaic human capture sequences  
350 display comparable magnitudes of both sources of bias (Figure S4.5). Therefore,  
351 although undoubtedly present, capture and reference biases cannot result in the

352 observed differences in divergence times between archaic human Y chromosomes and  
353 present-day human Y chromosomes (Figure 2).

354

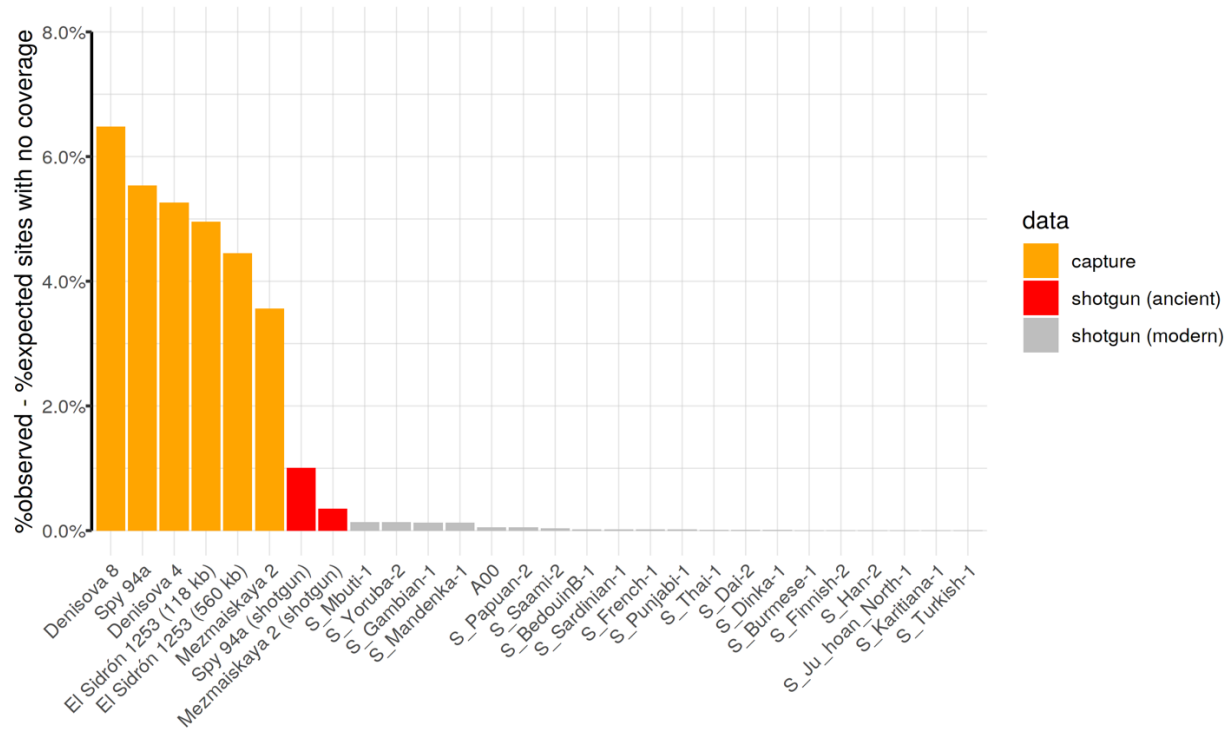

355

356 **Figure S4.5. Differences between expected and observed counts of sites without**  
357 **any sequencing coverage.** Exact counts are reported in Table S4.6. Data were filtered  
358 according to the criteria described in SI 4.1.

359

360

361

| name                    | coverage   | observed | expected | difference | data              |
|-------------------------|------------|----------|----------|------------|-------------------|
| Denisova 8              | 3.4820355  | 0.09555  | 0.03074  | 0.06481    | capture           |
| Spy 94a                 | 0.8253622  | 0.49341  | 0.43808  | 0.05533    | capture           |
| Denisova 4              | 1.3717806  | 0.30622  | 0.25365  | 0.05257    | capture           |
| El Sidrón 1253 (118 kb) | 3.2121215  | 0.08978  | 0.04027  | 0.04951    | capture           |
| El Sidrón 1253 (560 kb) | 7.9165032  | 0.04479  | 0.00036  | 0.04443    | capture           |
| Mezmaiskaya 2           | 14.3494002 | 0.03561  | 0.00000  | 0.03561    | capture           |
| Spy 94a (shotgun)       | 0.5052873  | 0.61337  | 0.60333  | 0.01004    | shotgun (ancient) |
| Mezmaiskaya 2 (shotgun) | 0.8248822  | 0.44174  | 0.43829  | 0.00345    | shotgun (ancient) |
| S_Yoruba-2              | 16.9616115 | 0.00129  | 0.00000  | 0.00129    | shotgun (modern)  |
| S_Mbuti-1               | 20.3360989 | 0.00129  | 0.00000  | 0.00129    | shotgun (modern)  |
| S_Mandenka-1            | 16.3312730 | 0.00127  | 0.00000  | 0.00127    | shotgun (modern)  |
| S_Gambian-1             | 20.1210272 | 0.00127  | 0.00000  | 0.00127    | shotgun (modern)  |
| A00                     | 20.8671570 | 0.00050  | 0.00000  | 0.00050    | shotgun (modern)  |
| S_Papuan-2              | 23.1529894 | 0.00048  | 0.00000  | 0.00048    | shotgun (modern)  |
| S_Saami-2               | 22.6298230 | 0.00033  | 0.00000  | 0.00033    | shotgun (modern)  |
| S_BedouinB-1            | 21.7140764 | 0.00016  | 0.00000  | 0.00016    | shotgun (modern)  |
| S_Sardinian-1           | 18.1189362 | 0.00015  | 0.00000  | 0.00015    | shotgun (modern)  |
| S_Punjabi-1             | 17.1469680 | 0.00013  | 0.00000  | 0.00013    | shotgun (modern)  |
| S_French-1              | 21.9031161 | 0.00013  | 0.00000  | 0.00013    | shotgun (modern)  |
| S_Thai-1                | 25.1203313 | 0.00010  | 0.00000  | 0.00010    | shotgun (modern)  |
| S_Dai-2                 | 19.8120096 | 0.00004  | 0.00000  | 0.00004    | shotgun (modern)  |
| S_Dinka-1               | 20.7590166 | 0.00004  | 0.00000  | 0.00004    | shotgun (modern)  |
| S_Finnish-2             | 17.0155033 | 0.00003  | 0.00000  | 0.00003    | shotgun (modern)  |
| S_Han-2                 | 20.7680004 | 0.00003  | 0.00000  | 0.00003    | shotgun (modern)  |
| S_Karitiana-1           | 22.1963029 | 0.00003  | 0.00000  | 0.00003    | shotgun (modern)  |
| S_Turkish-1             | 22.4638799 | 0.00003  | 0.00000  | 0.00003    | shotgun (modern)  |
| S_Ju_hoan_North-1       | 22.7025717 | 0.00003  | 0.00000  | 0.00003    | shotgun (modern)  |
| S_Burmese-1             | 29.2087547 | 0.00003  | 0.00000  | 0.00003    | shotgun (modern)  |

362

363 **Table S4.6. Proportions of expected and observed sites without any coverage.**

364

365

366

367

## 368 5. Genotype calling

### 369 5.1. Consensus genotype calling

370 The haploid nature of the human Y chromosome alleviates many issues inherent to  
371 genotype calling of diploid genomes. Most importantly, given that only one allele is  
372 expected to be present at each site of a non-recombining portion of the Y chromosome,  
373 observing more than one allele at a site must be the result of sequencing errors, DNA  
374 damage, contamination, or misalignment of reads. While such issues present a significant  
375 problem for calling diploid genotypes, by making it challenging to distinguish true  
376 heterozygous calls from erroneously called heterozygous genotypes (27, 28), they are  
377 less of an issue for haploid genotyping.

378 To call genotypes of the archaic and modern human Y chromosomes in our study,  
379 we applied a conservative approach to produce a consensus of sequencing reads. For  
380 each Y chromosome BAM file, we performed a pileup of reads at each site (disabling  
381 base quality recalibration), filtering out reads with mapping quality less than 25, ignoring  
382 bases with base quality less than 20 and removing reads carrying indels at a pileup  
383 position. Then, under the assumption that alleles introduced due to DNA damage,  
384 sequencing errors, misalignments, or contamination will be in a minority at each site, we  
385 called the allele supported by 90% of the reads in a pileup as the haploid genotype for  
386 that site. For further analyses, we additionally restricted to genotype calls supported by  
387 at least three reads, as described in section 5.3. This genotype calling procedure has  
388 been implemented as part of a functionality of a program which is freely available for  
389 download at <https://github.com/bodkan/bam-caller>.

390

## 391 5.2. Genotype calling using *snpAD*

392 The consensus genotype calling approach described in the previous section is quite  
393 conservative and does not incorporate an explicit model of DNA damage and sequencing  
394 errors. To validate the robustness of our consensus-based results, we compared them to  
395 genotype calls generated using *snpAD*, an aDNA-specific genotype caller (28). A major  
396 caveat of this approach is the fact that *snpAD* has been designed for calling diploid  
397 genotypes and accurate results requires at least 4X genomic coverage (28). Therefore,  
398 its genotype calling model has not been tested on low coverage, haploid chromosomes  
399 such as those generated in our study. While recognizing these limitations, we used *snpAD*  
400 to call genotypes of all four archaic Y chromosomes captured for the 6.9 Mb target regions  
401 (*Denisova 4*, *Denisova 8*, *Spy 94a* and *Mezmaiskaya 2*), discarded any sites which were  
402 called as heterozygous (likely the result of errors, contamination or aDNA damage), and  
403 converted all homozygous genotype calls to a haploid state.

404 In accordance with *snpAD*'s more sophisticated model of aDNA damage patterns,  
405 we have found that the number of successfully genotyped sites is higher than those  
406 generated by our simpler consensus-based genotype calling approach, but only  
407 marginally so (Table S5.1). Furthermore, although the rates of C-to-T and G-to-A SNP  
408 frequencies observed in the final set of genotype calls of the high coverage *Mezmaiskaya*  
409 2 is very close to the baseline expectation for present-day DNA, the remaining low  
410 coverage archaic Y chromosomes are still affected by aDNA damage and show an  
411 excess of falsely called genotypes (Figures S5.1 and S5.2). We note that this is not  
412 unexpected, because the coverage of these individuals is much lower than what is  
413 recommended by for *snpAD* (28). Overall, we did not observe significant differences

414 between *snpAD*-based and consensus-based genotypes in terms of the inferred times to  
415 the most recent common ancestor (TMRCA) and, in fact, we found that both lead to the  
416 same conclusions (Figure S7.11). Based on these analyses we concluded that our  
417 conservative 90% cutoff for consensus genotype calling method is appropriate and  
418 decided to use it for all analyses.  
419

### 420 5.3. Minimum coverage filtering

421 The majority of libraries analyzed in our study have not been treated with the uracil-  
422 deglycosylase (UDG) enzyme (SI 2). Unlike UDG-treated libraries, non-UDG libraries  
423 retain an increased deamination signal throughout the molecules (Figures S4.1 and S4.2)  
424 which poses a significant challenge for distinguishing false substitutions caused by aDNA  
425 damage from true polymorphisms (28).

426 For a given sequencing read carrying a putative substitution, it is not  
427 straightforward to decide whether this substitution represents a true polymorphism or  
428 error. Given enough sequencing coverage, this issue can be mostly overcome by  
429 observing a sufficient number of bases from reads that do not carry a deamination-  
430 induced substitution, integrating evidence from multiple reads at a site (28). However, as  
431 our data is of relatively low coverage (Figure 1B, Table S4.1), we were concerned by  
432 selecting an appropriate lower coverage cutoff to minimize the impact of false  
433 polymorphisms on our inferences. Specifically, if the same nucleotide is observed in a  
434 majority of reads mapped to the same genomic position, it is unlikely that this would be  
435 the result of aDNA damage, sequencing errors or contamination, as these occur mostly  
436 at relatively low frequencies in the individuals in our study (Figure S4.1 and Table S4.5).  
437 To get a sense of the frequency of calling false polymorphisms as a function of coverage,  
438 we calculated the proportions of observed genotypes in each archaic human Y  
439 chromosome given a certain coverage filtering cutoff and compared those to the baseline  
440 expectation for present-day human DNA. As expected, allowing SNPs supported by only  
441 one read leads to a significant excess of C-to-T and G-to-A SNP (Figure S5.1), a  
442 consequence of the presence of aDNA damage (Figure S4.1). We found that increasing



443 the minimum coverage cutoff to two reads causes the rate of aDNA-induced SNPs to drop  
444 significantly towards the baseline expectation, but going beyond requiring the support of  
445 three reads for each SNP does not lead to further improvement in accuracy of genotype  
446 calling (Figure S5.1). Because of this and because each additional increase in required  
447 minimum coverage is at the expense of the final number of available sites, we settled on  
448 a minimum coverage cutoff of 3 reads.

449 It is important to note that despite the residual presence of false aDNA  
450 substitutions in the final set of filtered genotype calls, manifesting as increased  
451 frequencies of C-to-T and G-to-A SNPs compared to present-day DNA (Figure S5.1),  
452 comparisons of archaic-modern human TMRCA estimates obtained using the full set of  
453 genotype calls and those based on genotypes restricted to non-C-to-T/G-to-A SNPs did  
454 not reveal any significant differences (Figure S7.9). This is partially due to very low rates  
455 of residual false SNPs that pass through the filtering, but mostly because our TMRCA  
456 estimators are quite insensitive to private mutations on the archaic lineage (SI 7). A  
457 second validation of our coverage filter follows from the fact that the two Denisovan and  
458 all three Neandertal Y chromosomes lead to the same TMRCA estimates with modern  
459 human Y chromosomes despite differences in coverage and rates of aDNA damage  
460 (Figures 1B, 2B and S5.1). Both of these factors would affect genotyping accuracy if not  
461 handled appropriately, and would introduce noise in TMRCA estimates estimated for  
462 individual Y chromosomes.

463 Complete counts of Y chromosome positions passing the filters for all individuals  
464 are reported in Tables 5.1 and 5.2 (counts for archaic and modern human individuals,

465 respectively, in 6.9 Mb target regions) and Tables 5.3 and 5.4 (counts for archaic and  
466 modern human individuals, respectively, in 560 kb target regions).

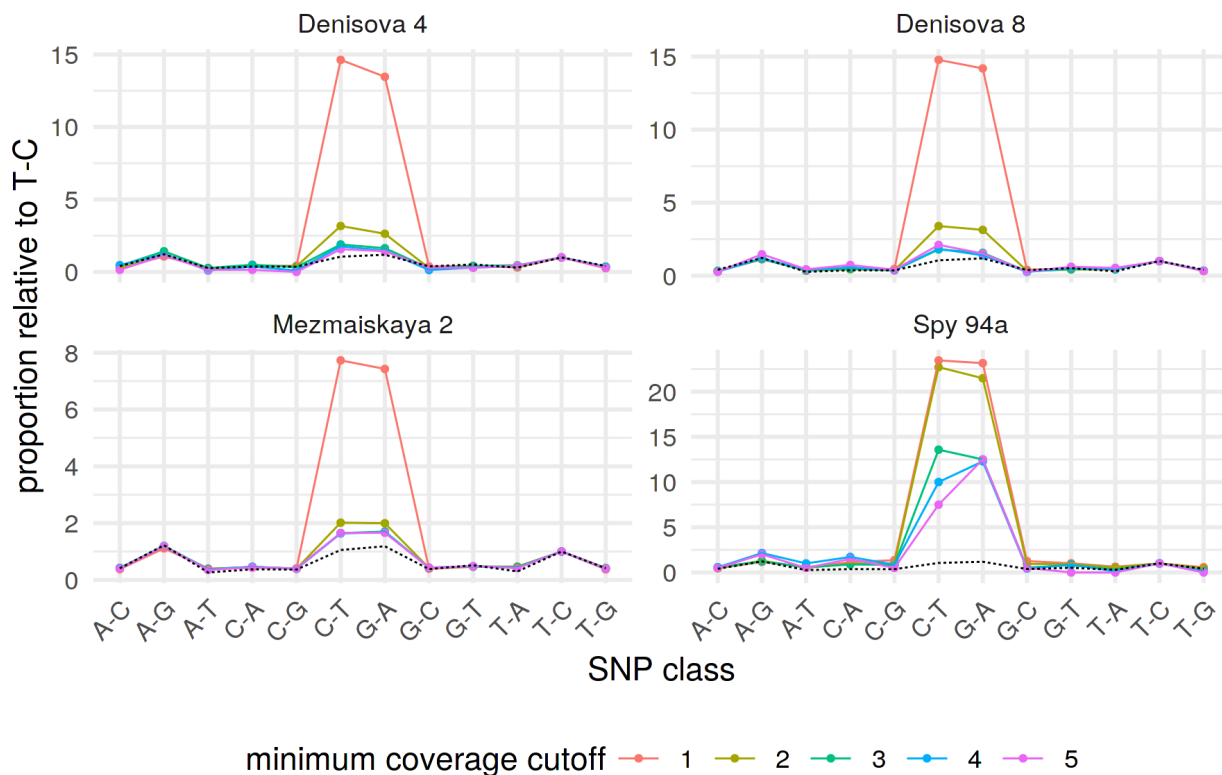

467

468 **Figure S5.1. Frequencies of observed polymorphisms normalized by the observed**

469 **frequency of T-C polymorphism.** SNP classes were counted for each archaic human Y

470 chromosome (one panel each) and all counts were normalized by dividing them with

471 observed counts of T-C SNPs. Dotted line shows an expectation based on SNP

472 proportions observed in Y chromosomes of the following SGDP individuals: *S\_French\_1*,

473 *S\_Papuan\_2*, *S\_Burmese\_1*, *S\_Thai\_1*, *S\_Sardinian\_1*.

474

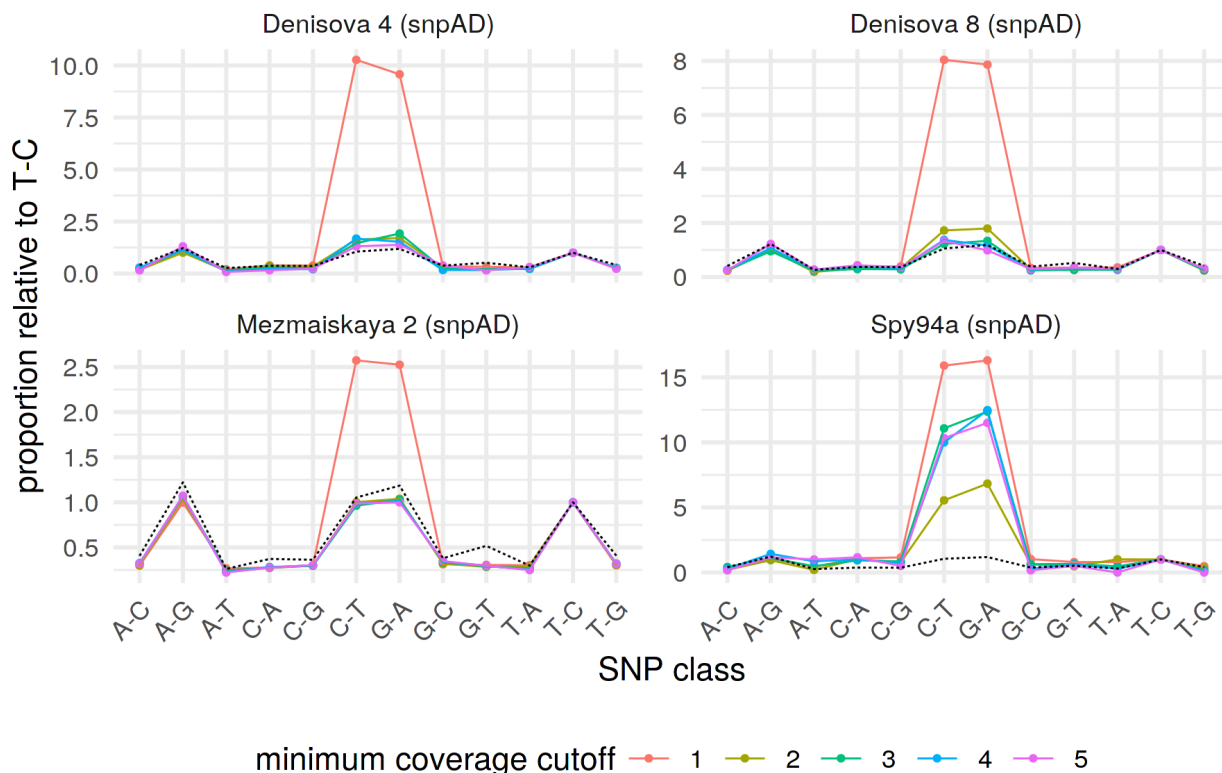

475

476 **Figure S5.2. Frequencies of observed polymorphisms normalized by the observed**

477 **frequency of T-C polymorphism.** SNP classes were counted for each archaic human Y

478 chromosome (one panel each) and all counts were normalized by dividing them with

479 observed counts of T-C SNPs. Dotted line shows an expectation based on SNP

480 proportions observed in Y chromosomes of the following SGDP individuals: *S\_French\_1*,

481 *S\_Papuan\_2*, *S\_Burmese\_1*, *S\_Thai\_1*, *S\_Sardinian\_1*.

482

483

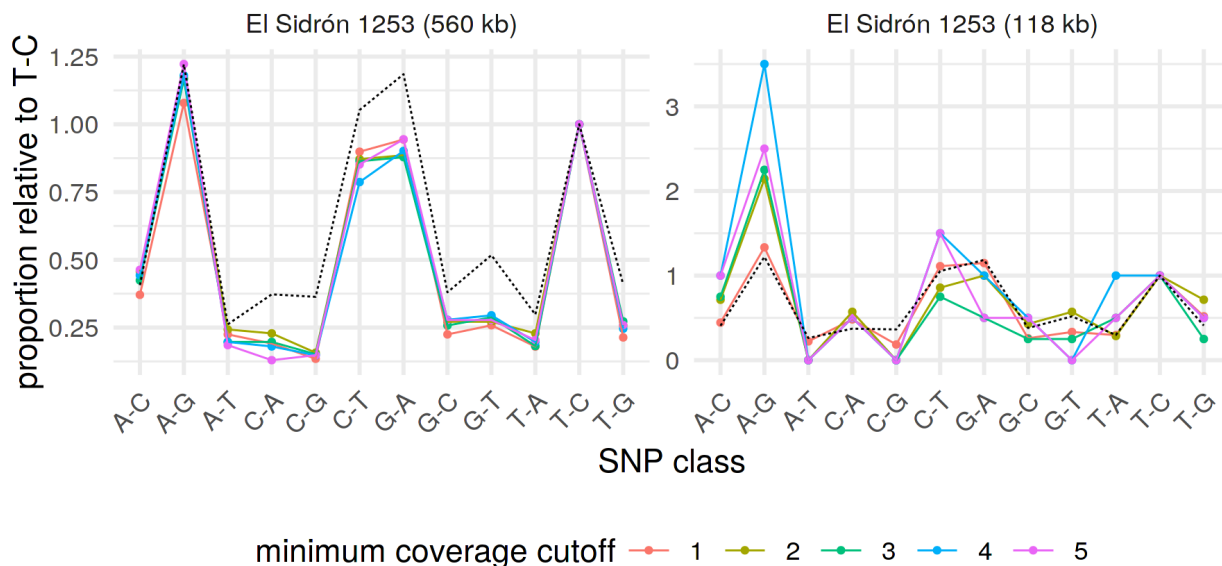

484

485 **Figure S5.3. Frequencies of observed polymorphisms normalized by the frequency**

486 **of T-C polymorphism.** SNP classes were counted for each archaic human Y

487 chromosome (one panel each) and all counts were normalized by dividing them with

488 observed counts of T-C SNPs. Dotted line shows an expectation based on SNP

489 proportions observed in Y chromosomes of the following SGDP individuals: *S\_French\_1*,

490 *S\_Papuan\_2*, *S\_Burmese\_1*, *S\_Thai\_1*, *S\_Sardinian\_1*.

491

492

493

494

495

496

| name                    | all sites |            | excluding C-to-T/G-to-A |            |
|-------------------------|-----------|------------|-------------------------|------------|
|                         | count     | proportion | count                   | proportion |
| Spy 94a (shotgun)       | 2,664,787 | 38.5%      | 2,636,405               | 38.1%      |
| Spy 94a                 | 3,502,380 | 50.7%      | 3,470,671               | 50.2%      |
| Spy 94a (snpAD)         | 3,557,124 | 51.5%      | 3,522,759               | 51.0%      |
| Denisova 4              | 4,731,302 | 68.4%      | 4,705,860               | 68.1%      |
| Denisova 4 (snpAD)      | 4,824,242 | 69.8%      | 4,798,037               | 69.4%      |
| Denisova 8              | 5,851,332 | 84.6%      | 5,828,356               | 84.3%      |
| Denisova 8 (snpAD)      | 6,260,242 | 90.6%      | 6,236,272               | 90.2%      |
| Mezmaiskaya 2 (shotgun) | 3,822,106 | 55.3%      | 3,762,768               | 54.4%      |
| Mezmaiskaya 2           | 6,348,948 | 91.8%      | 6,346,684               | 91.8%      |
| Mezmaiskaya 2 (snpAD)   | 6,669,912 | 96.5%      | 6,667,441               | 96.5%      |

497

498 **Table S5.1. Counts of sites for each archaic human Y chromosome in 6.9 Mb**  
 499 **capture regions which passed the filtering for minimum depth of 3 reads in addition**  
 500 **to other filtering and genotype calling criteria.** Multiple records for the same individual  
 501 indicate different versions of the data (shotgun sequences as opposed to capture) or  
 502 different ways of calling genotypes (consensus genotype calling or genotype calling using  
 503 snpAD). Reported are numbers for all sites and for sites excluding C-T and G-A  
 504 polymorphisms. The proportions are calculated relative to the total number of available  
 505 sites (6,912,728; SI 1).

506

| name              | all sites |            | excluding C-to-T/G-to-A |            |
|-------------------|-----------|------------|-------------------------|------------|
|                   | count     | proportion | count                   | proportion |
| A00-1             | 6,852,077 | 99.12%     | 6,851,175               | 99.11%     |
| A00-2             | 6,867,616 | 99.35%     | 6,866,716               | 99.33%     |
| A00               | 6,873,078 | 99.43%     | 6,872,184               | 99.41%     |
| Ust'-Ishim        | 6,888,071 | 99.64%     | 6,887,986               | 99.64%     |
| S_Yoruba-2        | 6,897,101 | 99.77%     | 6,896,820               | 99.77%     |
| S_Mandenka-1      | 6,898,162 | 99.79%     | 6,897,879               | 99.79%     |
| S_Mbuti-1         | 6,898,694 | 99.80%     | 6,898,400               | 99.79%     |
| S_Gambian-1       | 6,899,210 | 99.80%     | 6,898,929               | 99.80%     |
| S_Papuan-2        | 6,904,393 | 99.88%     | 6,904,208               | 99.88%     |
| S_Thai-1          | 6,905,023 | 99.89%     | 6,904,846               | 99.89%     |
| S_BedouinB-1      | 6,905,031 | 99.89%     | 6,904,820               | 99.89%     |
| S_Saami-2         | 6,905,291 | 99.89%     | 6,905,102               | 99.89%     |
| S_Sardinian-1     | 6,905,558 | 99.90%     | 6,905,352               | 99.89%     |
| S_Ju_hoan_North-1 | 6,906,228 | 99.91%     | 6,905,872               | 99.90%     |
| S_Karitiana-1     | 6,906,409 | 99.91%     | 6,906,258               | 99.91%     |
| S_Dai-2           | 6,906,414 | 99.91%     | 6,906,248               | 99.91%     |
| S_Burmese-1       | 6,906,438 | 99.91%     | 6,906,260               | 99.91%     |
| S_Dinka-1         | 6,906,507 | 99.91%     | 6,906,225               | 99.91%     |
| S_French-1        | 6,906,914 | 99.92%     | 6,906,738               | 99.91%     |
| S_Punjabi-1       | 6,907,065 | 99.92%     | 6,906,885               | 99.92%     |
| S_Finnish-2       | 6,907,088 | 99.92%     | 6,906,889               | 99.92%     |
| S_Han-2           | 6,907,603 | 99.93%     | 6,907,417               | 99.92%     |
| S_Turkish-1       | 6,907,751 | 99.93%     | 6,907,717               | 99.93%     |

507

508

509 **Table S5.2. Counts of sites for each modern human Y chromosome (consensus**  
510 **genotype calls of shotgun data) in 6.9 Mb capture regions which passed the**  
511 **filtering for minimum depth of 3 reads in addition to other filtering and genotype**  
512 **calling criteria.** Reported are numbers for all sites and for sites excluding C-T and G-A  
513 polymorphisms. The proportions are calculated relative to the total number of available  
514 sites (6,912,728).

515



| name                    | all sites |            | excluding C-to-T/G-to-A |            |
|-------------------------|-----------|------------|-------------------------|------------|
|                         | count     | proportion | count                   | proportion |
| Spy 94a                 | 275,626   | 49.55%     | 272,798                 | 49.04%     |
| Denisova 4              | 408,775   | 73.49%     | 406,508                 | 73.08%     |
| Denisova 8              | 484,377   | 87.08%     | 482,608                 | 86.76%     |
| Mezmaiskaya 2           | 509,145   | 91.53%     | 508,962                 | 91.50%     |
| El Sidrón 1253 (560 kb) | 530,172   | 95.31%     | 530,046                 | 95.29%     |

516

517

518 **Table S5.3. Counts of sites for each archaic human Y chromosome (in 560 kb**  
519 **capture regions) which passed the filtering for minimum depth of 3 reads in**  
520 **addition to other filtering and genotype calling criteria.** Reported are numbers for all  
521 sites and for sites excluding C-to-T and G-to-A polymorphisms. The proportions are  
522 calculated relative to the total number of available sites (556,259).

523

| name              | all sites |            | excluding C-to-T and G-to-A |            |
|-------------------|-----------|------------|-----------------------------|------------|
|                   | count     | proportion | count                       | proportion |
| A00-1             | 552,557   | 99.33%     | 552,456                     | 99.32%     |
| S_Yoruba-2        | 553,203   | 99.45%     | 553,112                     | 99.43%     |
| S_Mandenka-1      | 553,348   | 99.48%     | 553,257                     | 99.46%     |
| S_Gambian-1       | 553,365   | 99.48%     | 553,275                     | 99.46%     |
| S_Mbuti-1         | 553,381   | 99.48%     | 553,288                     | 99.47%     |
| A00-2             | 553,422   | 99.49%     | 553,321                     | 99.47%     |
| A00               | 553,618   | 99.53%     | 553,517                     | 99.51%     |
| Ust'-Ishim        | 554,575   | 99.70%     | 554,550                     | 99.69%     |
| S_Thai-1          | 555,830   | 99.92%     | 555,787                     | 99.92%     |
| S_Dinka-1         | 555,842   | 99.93%     | 555,785                     | 99.91%     |
| S_BedouinB-1      | 555,850   | 99.93%     | 555,806                     | 99.92%     |
| S_Sardinian-1     | 555,855   | 99.93%     | 555,813                     | 99.92%     |
| S_Burmese-1       | 555,862   | 99.93%     | 555,818                     | 99.92%     |
| S_Dai-2           | 555,864   | 99.93%     | 555,819                     | 99.92%     |
| S_Ju_hoan_North-1 | 555,870   | 99.93%     | 555,818                     | 99.92%     |
| S_Karitiana-1     | 555,876   | 99.93%     | 555,848                     | 99.93%     |
| S_Saami-2         | 555,927   | 99.94%     | 555,891                     | 99.93%     |
| S_French-1        | 555,942   | 99.94%     | 555,902                     | 99.94%     |
| S_Finnish-2       | 555,945   | 99.94%     | 555,906                     | 99.94%     |
| S_Papuan-2        | 555,951   | 99.94%     | 555,918                     | 99.94%     |
| S_Punjabi-1       | 555,958   | 99.95%     | 555,920                     | 99.94%     |
| S_Turkish-1       | 555,971   | 99.95%     | 555,966                     | 99.95%     |
| S_Han-2           | 556,022   | 99.96%     | 555,978                     | 99.95%     |

524  
525 **Table S5.4. Counts of sites for each modern human Y chromosome (in 560 kb**  
526 **capture regions) which passed the filtering for minimum depth of 3 reads in**  
527 **addition to other filtering and genotype calling criteria. Reported are numbers for all**

528 sites and for sites excluding C-to-T and G-to-A polymorphisms. The proportions are  
529 calculated relative to the total number of available sites (556,259).

530

## 531 6. Inferring phylogenetic relationships

532 To resolve the phylogenetic relationships of each archaic human Y chromosome to all  
533 other Y chromosome sequences, we merged the VCF files with genotype calls from each  
534 individual (including the chimpanzee) into a single VCF file and converted the genotypes  
535 to the FASTA format using a custom Python script (available on our Github repository:  
536 <https://github.com/bodkan/archaic-ychr>). To mitigate biases introduced by low coverage  
537 and characteristics of aDNA damage (29), we excluded all C-to-T and G-to-A  
538 polymorphisms and applied the same filters for each individual as for all other analyses  
539 in our study. Finally, we excluded monomorphic sites and sites carrying private changes  
540 on the chimpanzee lineage to reduce the size of the final alignment file.

541 To construct a neighbor-joining phylogenetic tree (Figure 2A), we utilized the  
542 functionality provided by R packages *ape* and *phangorn* (30, 31). First, we calculated the  
543 distance matrix between all Y chromosome pairs in the FASTA file with the function  
544 `dist.dna`, using the model of simple pairwise differences (`model = "raw"`) and  
545 excluding sites with missing data specific to each pair (`pairwise.deletion = TRUE`).  
546 We then provided this distance matrix to the `nj` function and rooted the resulting  
547 neighbor-joining tree using the function `midpoint` from the *phangorn* package. Bootstrap  
548 confidence numbers for the neighbor-joining tree were calculated using *ape*'s  
549 `boot.phylo` function over 100 replicates. After inspecting the resulting phylogenetic  
550 tree, we found that the private branch leading to the *Denisova 4* had a negative length  
551 (value = -0.00088). Given that negative branch lengths are a relatively common artefact  
552 of the neighbor-joining algorithm and do not affect the reliability of the generated tree we  
553 followed the recommendation to set the branch length to zero (32). We note that this does

554 not have any impact on our conclusions, because the change involves a private branch  
555 whose length is not meaningful given the discrepancies between sample dates and  
556 implied tree tip dates (Figures 1A and 2A, (29)). The final trees were annotated and  
557 plotted using the R package *ggtree* (33).

558

559

## 560 7. Estimating the TMRCA of archaic and modern human Y 561 chromosomes

562 Given that most of the Y chromosome capture data analyzed in our study is of relatively  
563 low coverage (Figure 1B, Table S4.1), care needs to be taken when estimating  
564 phylogenetic parameters such as the time to the most recent common ancestor (TMRCA).  
565 Similarly, low coverage and the associated reduction in the accuracy of genotype calls  
566 render the inferred aDNA branch lengths unreliable (29). Any phylogenetic method of  
567 choice must be therefore robust to sequencing errors and incorrect branch lengths. We  
568 also observe discordances between sample dates and implied molecular tip dates, likely  
569 due to residual genotype calling errors (compare Figure 1A vs Figure 2A). We therefore  
570 estimated TMRCA between archaic and modern human Y chromosomes using a  
571 method inspired by the analysis of the *El Sidrón 1253* Neandertal coding sequence (5).  
572 Instead of using polymorphisms on the archaic human lineage, this method relies on first  
573 estimating the TMRCA of a pair of high-coverage African and non-African Y  
574 chromosomes ( $TMRCA_{AFR}$ ) which is then used to extrapolate the deeper divergence time  
575 between archaic and modern human Y chromosomes. We describe the method in the  
576 sections below, detailing our modifications and improvements.

577

578

## 579 7.1. TMRCA of Africans and non-Africans $TMRCA_{AFR}$

580 The original study by Mendez *et al.* estimated the TMRCA between the A00 African Y  
581 chromosome lineage and the hg19 Y chromosome as a representative of non-African Y  
582 chromosomes (5, 21). In order to get a better sense of the uncertainty and noise in our  
583 TMRCA estimates, we expanded the present-day Y chromosome reference panel to 13  
584 non-African and 6 African Y chromosomes from the SGDP data set (Table S7.1) (20).

585 In the first step, we estimated mutation rate in the 6.9 Mb capture target using the  
586 high-coverage Y chromosome of *Ust'-Ishim*, a 45,000 years old hunter-gatherer from  
587 Siberia (22). We counted derived mutations missing on the *Ust'-Ishim* branch compared  
588 to those observed in the panel of 13 non-African Y chromosomes, and used this branch-  
589 shortening to calculate mutation rate assuming generation time of 25 years (Figure S7.1,  
590 Table S7.2). In the second step, we counted mutations accumulated on an African lineage  
591 and a non-African lineage since their split from each other and calculated the TMRCA of  
592 both (in units of years ago) using the mutation rate estimated in the first step. Importantly,  
593 we discovered that the branch-lengths in Africans are as much as 13% shorter compared  
594 to non-Africans (Figure S7.3), which is consistent with significant branch length variability  
595 discovered in previous studies and suggested to be a result of various demographic and  
596 selection processes (35, 36). To keep our methodology consistent throughout our  
597 analyses, we estimated the TMRCA of African and non-African Y chromosomes as the  
598 length of the non-African Y lineage (sum of branch lengths  $a + d$  in Figure S7.1).  
599 Encouragingly, we found that our mutation rate and  $TMRCA_{AFR}$  point estimates (Table  
600 S7.2) match closely those based on a large panel of present-day Y chromosomes (21).  
601 Most importantly, using the A00 lineage as a representative of the deepest known split

602 among present-day human Y chromosomes we inferred a  $TMRCA_{A00}$  of ~249 years ago  
603 (point estimate based on an estimated mutation rate of  $7.34 \times 10^{-10}$  per bp per year), which  
604 is comparable to the  $TMRCA_{A00}$  of ~254 years ago estimated by Karmin et al., 2015.  
605 Therefore, our more restricted 6.9 Mb capture target gives TMRCA estimates consistent  
606 with those obtained from the full Y chromosome shotgun data (21).

607

608



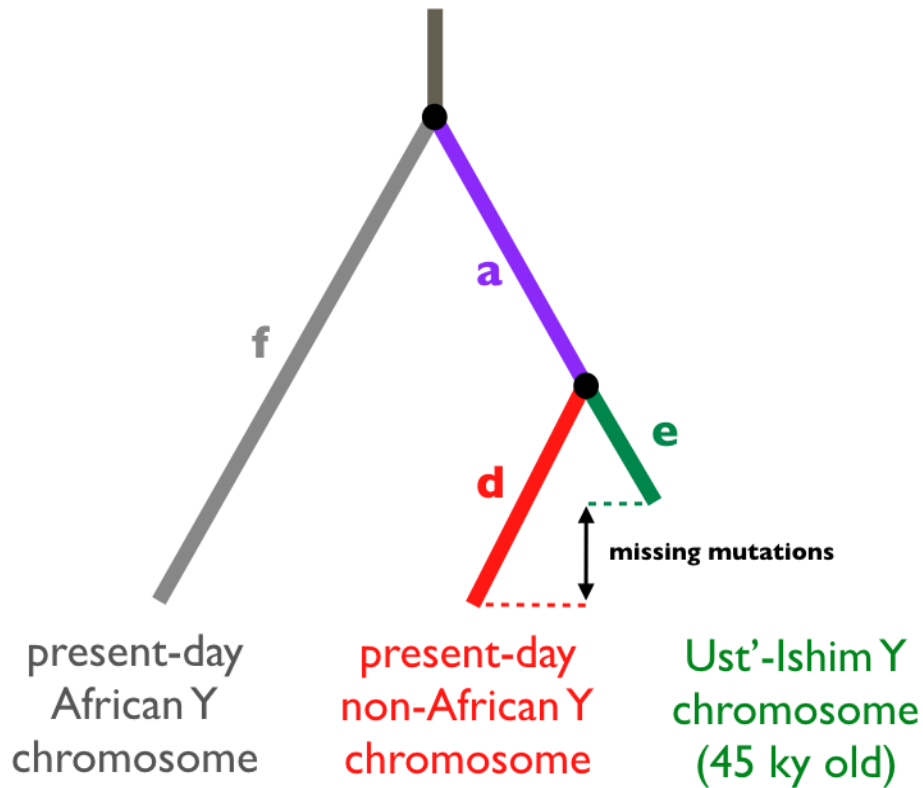

609

610 **Figure S7.1. Schematic of the branch-counting method to estimate the mutation**

611 **rate and split times of African and non-African Y chromosomes.** Accurate knowledge

612 of the age of the *Ust'-Ishim* individual (22) makes it possible to estimate the mutation rate

613 within the 6.9 Mb target capture regions. We use the number of mutations missing on the

614 *Ust'-Ishim* lineage since this individual died (45 kya) and compare it to another non-

615 African Y chromosome, i.e. the quantity  $d - e$ . We used this mutation rate to calculate the

616 TMRCA between a pair of non-African and African Y chromosomes as the total length of

617 the branches  $a + d$ .

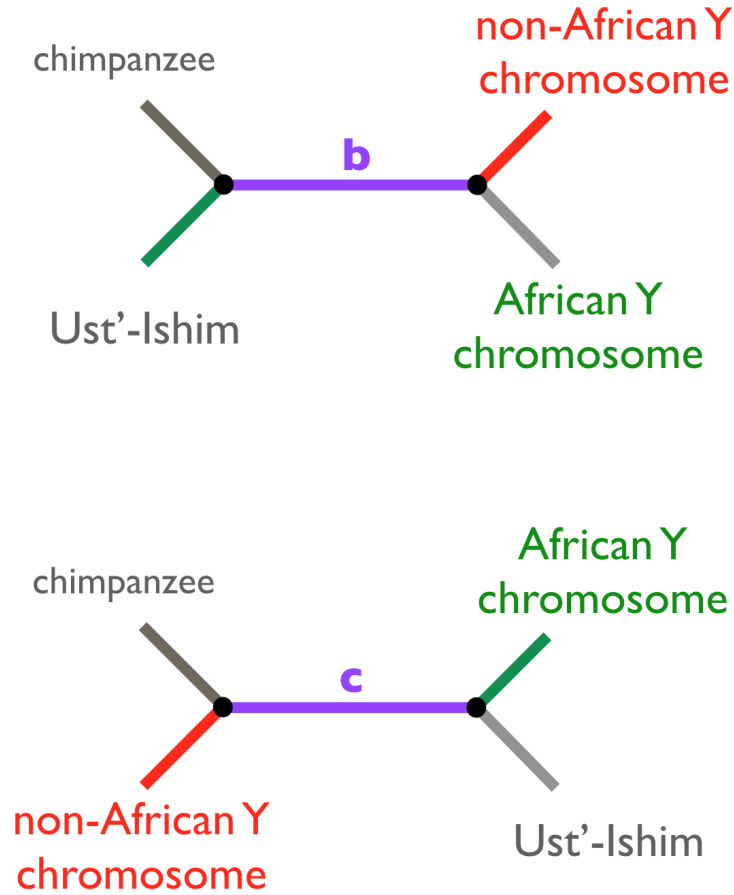

618

619 **Figure S7.2. Two alternative site patterns which are discordant with the true**  
620 **phylogenetic relationship.** Given that the true phylogenetic relationship is that shown in  
621 Figure S7.1, these alternative branch patterns must be a result of double mutations or  
622 genotype calling errors.

623

624

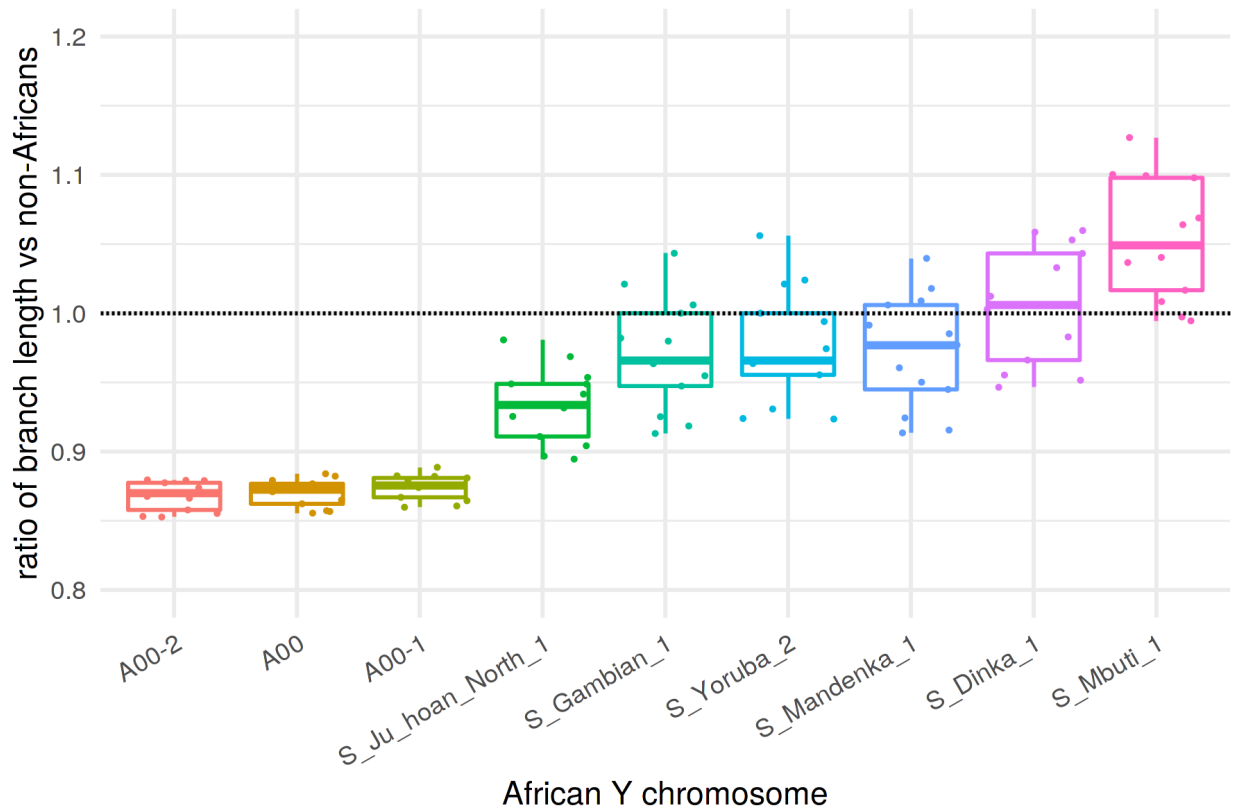

625

626 **Figure S7.3. Branch length differences between African Y chromosomes and a**

627 **panel of 13 non-African Y chromosomes.** Ratios were calculated by creating an

628 alignment of chimpanzee, African and non-African Y chromosomes and taking the ratio

629 of the number of derived alleles observed in an African (x-axis) and the number of derived

630 alleles in each of the individual non-Africans (dots, Table S7.1). “A00” represents a merge

631 of sequences of two lower coverage Y chromosomes, A00-1 and A00-2 (Table S4.3).

632

633

| <b>individual</b> | <b>haplogroup</b> |
|-------------------|-------------------|
| S_Finnish-2       | I1a1b5            |
| S_Sardinian-1     | J1b2b             |
| S_BedouinB-1      | J1b2b             |
| S_Punjabi-1       | J2a1              |
| S_French-1        | J2a1b1            |
| S_Turkish-1       | R1b1a2a1a2c1g     |
| S_Karitiana-1     | Q1a2a1a1          |
| S_Saami-2         | N1c1a1a2a         |
| S_Burmese-1       | O3a1c2            |
| S_Thai-1          | O3a2c             |
| S_Dai-2           | O2a1              |
| S_Han-2           | O1a1              |
| S_Papuan-2        | S                 |
| S_Dinka-1         | E2a               |
| S_Gambian-1       | E1b1a1a1f         |
| S_Ju_hoan_North-1 | B2b1b             |
| S_Mandenka-1      | E1b1a1a1g1        |
| S_Mbuti-1         | E1b1a1a1g1        |
| S_Yoruba-2        | E1b1a1a1f1b1      |
| A00               | A00               |
| A00-1             | A00               |
| A00-2             | A00               |

634

635

636 **Table S7.1. Haplogroups of present-day human Y chromosomes used in our**

637 **reference panel.** Haplogroup names were taken from the SGDP annotation table (20).

638 Haplogroups of the African panel are highlighted in gray. The A00 individual represents

639 a merge of lower coverage sequences of two individuals, here named A00-1 and A00-2

640 (Table S4.3).

641

642

643  
644

| African           | a      | b   | c   | d     | e    | f      | total     | mutation rate<br>(bp <sup>-1</sup> × year <sup>-1</sup> ) | TMRCA <sub>AFR</sub><br>(years ago) |
|-------------------|--------|-----|-----|-------|------|--------|-----------|-----------------------------------------------------------|-------------------------------------|
| A00               | 1060.2 | 1.2 | 8.3 | 214.5 | 14.2 | 1103.1 | 6,064,477 | 7.34e-10                                                  | 249211.63                           |
| A00-2             | 1054.5 | 1.2 | 8.2 | 214.7 | 14.6 | 1092.7 | 6,045,632 | 7.35e-10                                                  | 247074.54                           |
| A00-1             | 1004.2 | 1.2 | 8.1 | 207.2 | 14.2 | 1054.1 | 5,855,414 | 7.32e-10                                                  | 246756.41                           |
| S_Ju_hoan_North_1 | 261.5  | 2.7 | 8.5 | 216.3 | 14.5 | 439.2  | 6,100,839 | 7.35e-10                                                  | 98443.62                            |
| S_Mbuti_1         | 116.5  | 1.2 | 8.9 | 217.5 | 14.5 | 344.7  | 6,123,504 | 7.37e-10                                                  | 76782.21                            |
| S_Dinka_1         | 110.8  | 2.1 | 8.7 | 217.4 | 14.5 | 321.2  | 6,090,467 | 7.40e-10                                                  | 71573.49                            |
| S_Mandenka_1      | 120.9  | 1.2 | 8.8 | 218.3 | 14.5 | 321.0  | 6,123,094 | 7.39e-10                                                  | 71226.46                            |
| S_Gambian_1       | 118.8  | 1.2 | 8.5 | 218.1 | 14.5 | 320.2  | 6,096,582 | 7.42e-10                                                  | 71127.40                            |
| S_Yoruba_2        | 118.9  | 1.2 | 8.7 | 217.6 | 13.5 | 320.9  | 6,121,558 | 7.41e-10                                                  | 71119.46                            |

645  
646  
647  
648  
649  
650  
651  
652  
653  
654  
655  
656  
657

**Table S7.2. Branch counts and estimates of mutation rate and TMRCA between an African lineage and a panel of 13 non-African Y chromosomes.** All quantities represent averages across all non-African Y chromosomes (Table S7.1). Counts in columns *a* to *f* represent counts of site patterns as shown in Figures S7.1 and S7.2. “Total” represents the number of sites out of the total 6.9 Mb of target sequence available for the analysis. The last two columns represent the inferred mutation rate based on the *Ust’-Ishim* branch-shortening and the average TMRCA between a given African and a panel of non-Africans calculated from the length of the *a* + *d* branch as shown in Figure S7.1.

## 658 7.2. Archaic human-modern human TMRCA ( $TMRCA_{archaic}$ )

659  
660 Having estimated  $TMRCA_{AFR}$  (section 7.1), we can express the TMRCA of archaic and  
661 modern human Y chromosomes ( $TMRCA_{archaic}$ ) as a factor of how much older is  
662  $TMRCA_{archaic}$  compared to  $TMRCA_{AFR}$  (Figure S7.4). In mathematical terms, if we call the  
663 scaling factor  $\alpha$  (following the terminology of (5)), we can write

$$664 TMRCA_{archaic} = \alpha \times TMRCA_{AFR} . \quad (1)$$

665

666 In the remainder of this section, we present two ways of calculating  $\alpha$ , first using the  
667 original approach of Mendez *et al.* and then using a more straightforward method.

668

### 669 **Mendez et al. approach to calculate $\alpha$**

670

671 Based on Figure S7.4, an alternative way to express  $TMRCA_{archaic}$  in addition to  
672 equation (1) is

$$673 TMRCA_{archaic} = T_{shared} + TMRCA_{AFR} . \quad (2)$$

674

675 The expressions (1) and (2) define a system of two equations and three variables, which  
676 can be solved for  $T_{shared}$  to get

$$677 T_{shared} = \alpha \times TMRCA_{AFR} - TMRCA_{AFR} = TMRCA_{AFR} \times (\alpha - 1). \quad (3)$$

678

679

680

681 Mendez *et al.* found an expression for  $\alpha$  by considering a ratio of time shared by hg19  
682 and A00 Y chromosomes after their split from the *El Sidrón 1253* Neandertal ( $T_{shared}$   
683 above) and private branch lengths of both (Figure S7.4), arriving at the following  
684 expression:

$$685 \quad \frac{T_a}{T_a + T_d + T_e} = \frac{T_{shared}}{T_{shared} + 2 T_{AFR}} = \frac{T_{AFR} (\alpha - 1)}{T_{AFR} (\alpha - 1) + 2 T_{AFR}} = \frac{\alpha - 1}{\alpha + 1}. \quad (4).$$

686

687 Assuming mutation rate constancy on different lineages,  $\alpha$  can be found by solving the  
688 following equation

$$689 \quad \frac{a}{a + d + e} = \frac{\alpha - 1}{\alpha + 1},$$

690 which leads to

$$691 \quad \alpha = \frac{2 a + d + e}{d + e}. \quad (5)$$

692

693 Using this expression for  $\alpha$  and the values of  $TMRC A_{AFR}$  estimated in section 7.1, we can  
694 calculate  $TMRC A_{archaic}$  for each pair of archaic and non-African Y chromosomes using  
695 equation (5) (Figure 7.9B).

696

### 697 **A more robust $\alpha$ statistic**

698 While investigating the effect of minimum coverage filtering on genotype calling accuracy  
699 (section 5.3), we discovered a concerning dependence of the apparent branch lengths on  
700 the choice of the minimum coverage cutoff. Under normal conditions, the relative  
701 proportions of branch lengths  $a$ ,  $d$  and  $e$  (Figure S7.4) should remain constant regardless  
702 of coverage. This is crucial because the  $\alpha$  estimator proposed by Mendez *et al.* is  
703 expressed in terms of proportions of lengths of all three of these branches (equation (5)).

704 Strikingly, we found that although the proportions of  $a$  and  $d$  branch lengths remain  
705 relatively stable even for extremely strict coverage filters, the relative length of the  $e$   
706 branch (given by the proportion of derived mutations on the private African branch) has  
707 increasing tendency (Figures S7.6 and S7.7). Furthermore, although this effect is most  
708 pronounced in low coverage samples (Figures S7.6 and S7.7), it is clearly present even  
709 in the high coverage *Mezmaiskaya 2*, although at much higher coverage cutoffs (Figure  
710 S7.8). Therefore, the issue is clearly not sample-specific but is a common artifact caused  
711 by pushing the minimum required coverage close to, or even beyond, the average  
712 coverage. Restricting to sites with high number of aligned reads leads to enrichment of  
713 regions of lower divergence from the reference sequence, distorting the normal  
714 proportions of derived mutations observed on different branches of the tree.

715

716 We note that there is a more straightforward way to express the scaling factor  $\alpha$ :

$$717 \quad \alpha = \frac{a + d}{d}. \quad (6)$$

718 This follows trivially from the definition of  $\alpha$  as the factor of how much deeper  
719  $TMRC A_{archaic}$  is compared to  $TMRC A_{AFR}$  and, unlike the original formulation of  $\alpha$   
720 (equation (5)), has the advantage of not relying on the relative length of the African branch  
721  $e$ . This is important not only because of discordant branch proportion patterns (Figures  
722 S7.6-S7.8) but also due to known unequal branch lengths observed in African and non-  
723 African Y chromosome lineages (Figure S7.3, (36, 37)).

724

725 For completeness, we note that in a situation without any bias we can assume  $e \approx d$ .

726 Substituting for  $e$  in equation (5) then gives



727 
$$\alpha = \frac{2a + d + e}{d + e} \approx \frac{2a + 2d}{2d} \approx \frac{a + d}{d}.$$

728

729 Therefore, under ideal conditions, both approaches to calculate  $\alpha$  (equations (5) and (6))  
730 are mathematically equivalent.

731

732 Using the new expression for  $\alpha$  and the values of  $TMRCA_{AFR}$  estimated in section 7.1, we  
733 can estimate  $TMRCA_{archaic}$  for each pair of archaic and non-African Y chromosomes  
734 using equation (5) (Figure 2A, Table S7.3). By comparing TMRCA results based on the  
735 two formulations for  $\alpha$ , we found similar estimates for most of the archaic human Y  
736 chromosomes in our study (Figures S7.9 and S7.10). The only exception are the two  
737 Denisovan Y chromosomes, for which we infer slightly higher TMRCA with modern  
738 humans using the new  $\alpha$  estimation procedure compared to the formulation based on the  
739 original method (Figures S7.9 and S7.10). This is a consequence of an increased  
740 proportion of the  $e$  branch relative to the  $d$  branch in *Denisova 4* and *Denisova 8* at the  
741 chosen minimum coverage filter which is evident in Figure S7.7. Because the original  
742 method of Mendez *et al.* relies on the  $e$  count of the derived African alleles (equation (5)),  
743 this leads to a slight decrease in the value of the  $\alpha$  factor and, consequently, to a lower  
744 inferred TMRCA value. In contrast, our new formulation of  $\alpha$  (equation (6)) is robust to  
745 this artifact and the inferred values of TMRCA are not affected.

746

747 Finally, we want to emphasize that although the analyses of branch length discrepancies  
748 discussed in this section were mostly based on results obtained using the A00 Y  
749 chromosome lineage, the issues we discovered are not specific to a particular choice of

750 an African Y chromosome (Figure S7.8A-C). However, comparisons of TMRCA estimates  
751 for the low coverage samples with those obtained for the high coverage samples (which  
752 do not show any biases at coverage cutoffs used throughout our study) clearly show that  
753 the inferences are most stable when the A00 lineage is used in the calculation of the  $\alpha$   
754 scaling factor, even for the samples with lowest coverage (Figure S7.13). Therefore, all  
755 main results in our study are based on calculations using the A00 high coverage Y  
756 chromosome.  
757

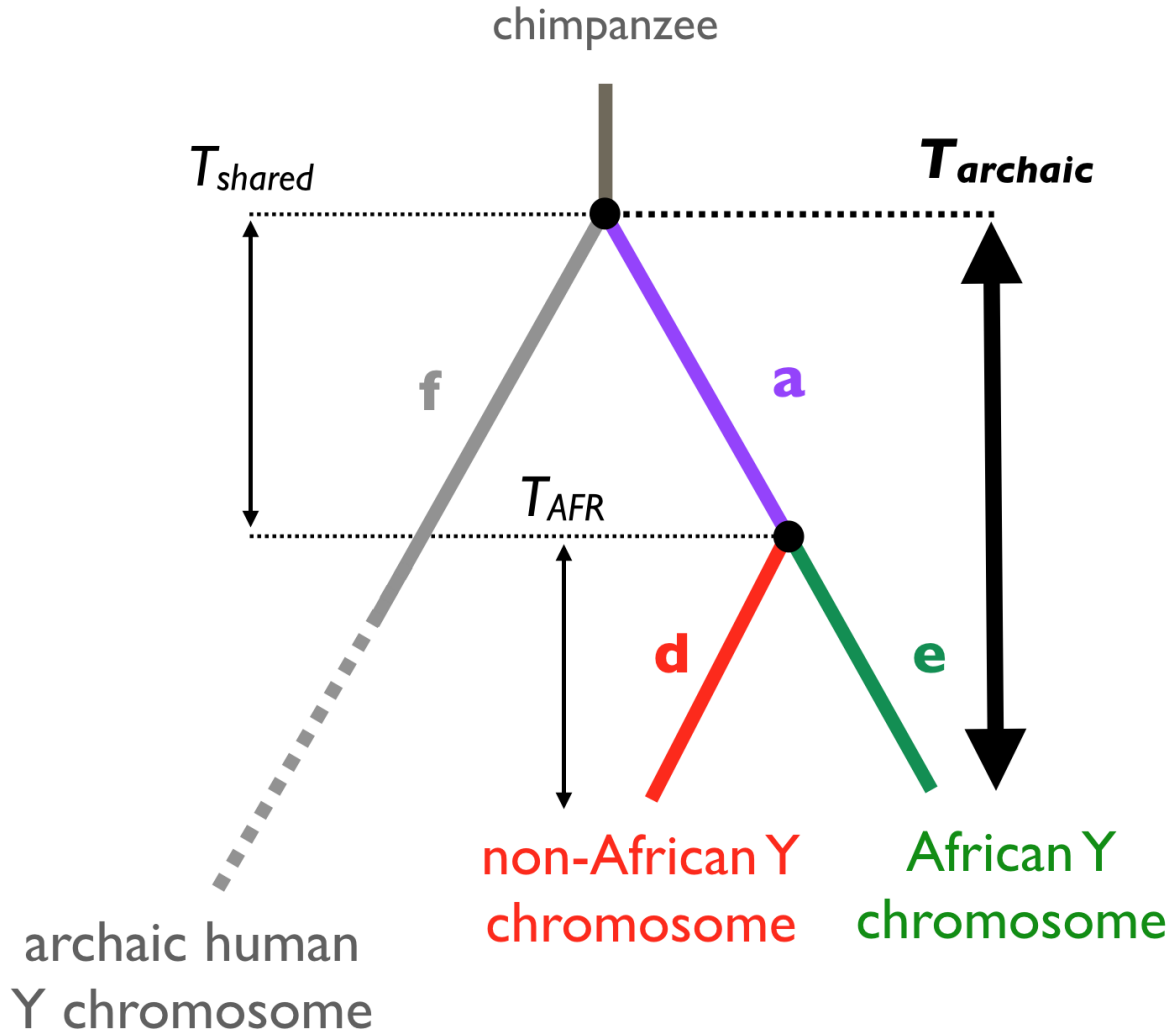

758  
759

760 **Figure S7.4. Branch-counting method to estimate the TMRCA of archaic and**  
761 **present-day human Y chromosomes.** As explained in section 7.2, we can decompose  
762 the quantity of interest ( $T_{ARCH}$ , thick arrow) using two quantities  $T_{shared}$  and  $T_{AFR}$  and  
763 express it simply as a factor of  $T_{AFR}$ , which can be accurately estimated using high-quality  
764 modern human Y chromosome sequences (section 7.1).

765

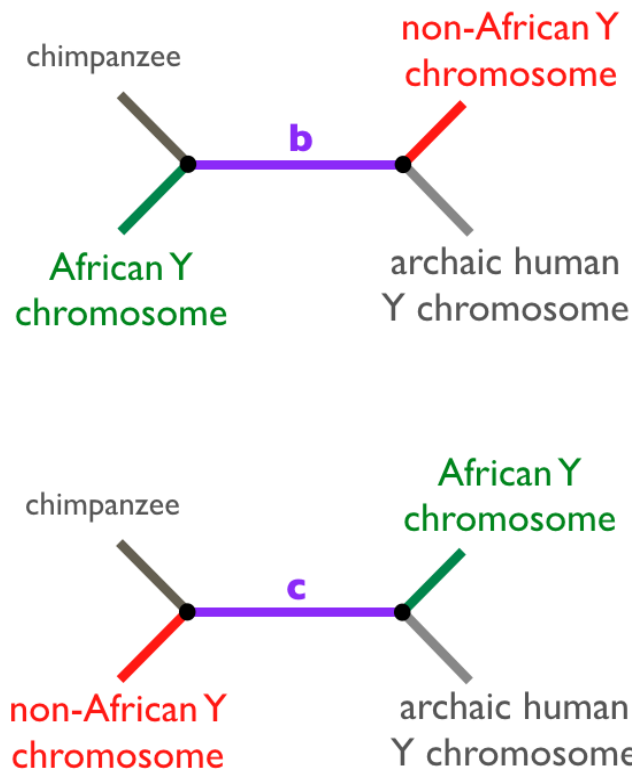

766

767

768 **Figure S7.5. Alternative tree topologies with two additional possible branch counts**

769 **b and c.** These topologies are incongruent with the true phylogenetic trees and the branch

770 counts *b* and *c* are most likely a result of back mutations or sequencing errors.

771

772

773

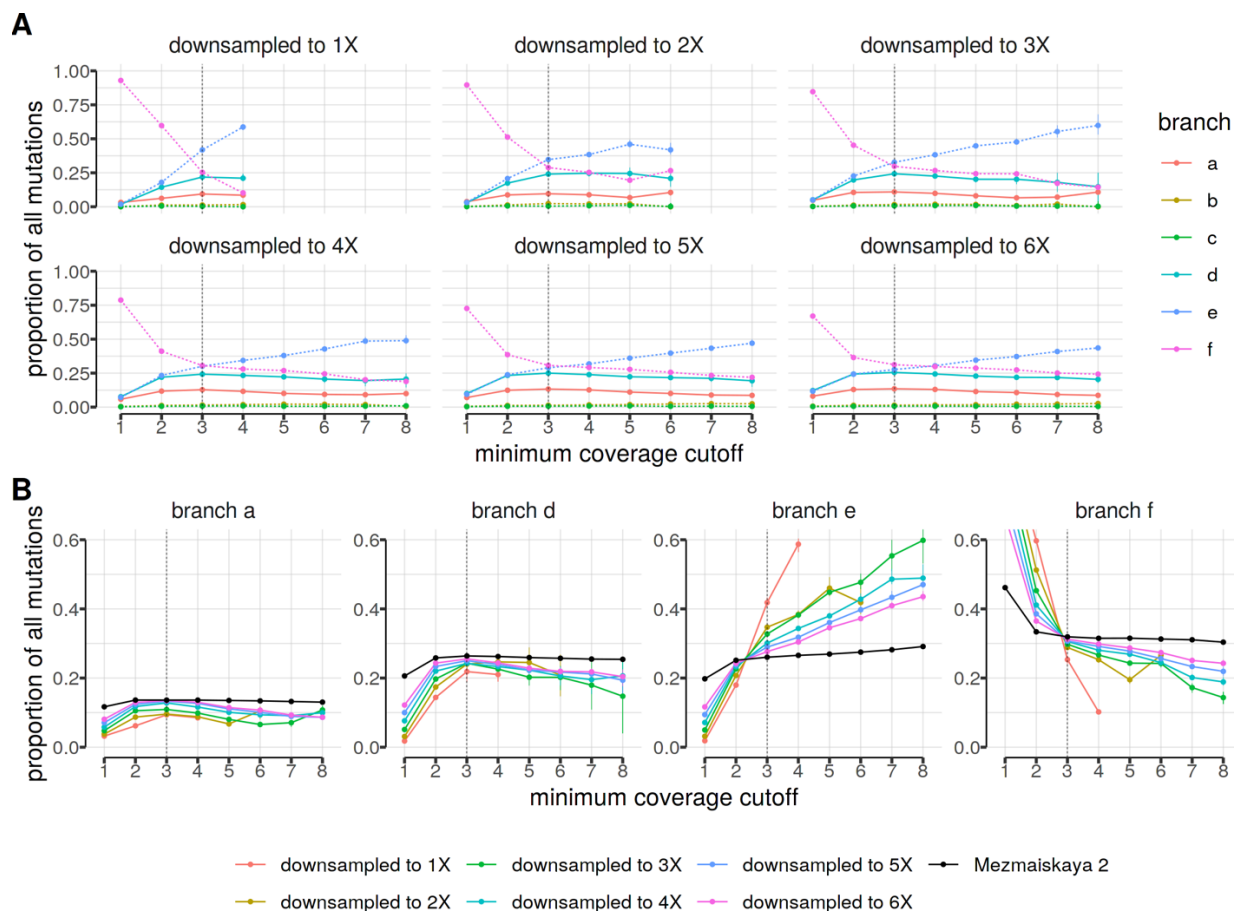

774

775 **Figure S7.6. Relative proportion of branch lengths in downsampled *Mezmaiskaya***

776 **2 data as a function of minimum coverage cutoff. (A)** Panels show results for 14.3X

777 *Mezmaiskaya 2* downsampled down to 1X, 2X, ... 6X coverage. **(B)** Same as in panel (A)

778 but partitioned per branch. Black solid lines show expectations based on the full

779 *Mezmaiskaya 2* data. Increased relative proportions of the *f* branch lengths are due to

780 false polymorphisms at low coverage cutoffs. Branch length proportions (labeled as in

781 Figure S7.4) were calculated as  $\frac{a}{N}, \frac{b}{N}, \dots, \frac{f}{N}$ , where  $N = a + b + \dots + f$ . Vertical dotted lines

782 indicate a 3X lower coverage cutoff used throughout our study (section 5.3). Branch

783 counts were averaged over pairs of 13 non-Africans and the A00 African Y chromosome.

784 Analysis is based on all classes of polymorphisms.

785

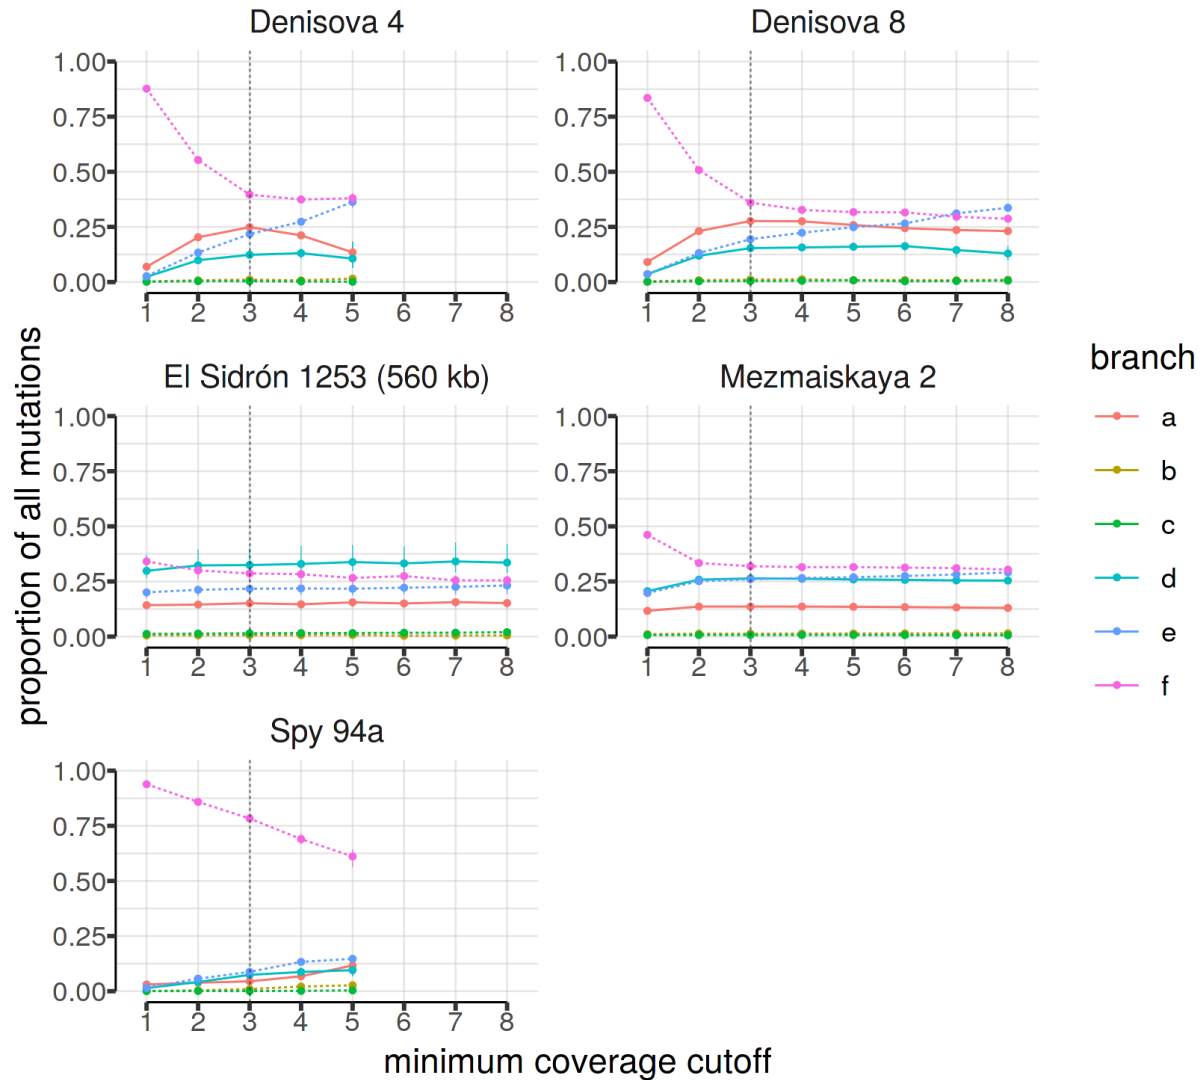

786

787 **Figure S7.7. Relative proportion of branch lengths as a function of minimum**

788 **coverage support required for each genotype call.** Branch length proportions (colored

789 lines) were calculated as  $\frac{a}{N}, \frac{b}{N}, \dots, \frac{f}{N}$ , where  $N = a + b + \dots + f$ . Vertical dotted lines

790 indicate a 3X lower coverage cutoff used throughout our study (section 5.3). With the

791 exception of *El Sidrón 1253*, all panels show results for the 6.9 Mb capture data. Analysis

792 is based on all polymorphisms.

793

794

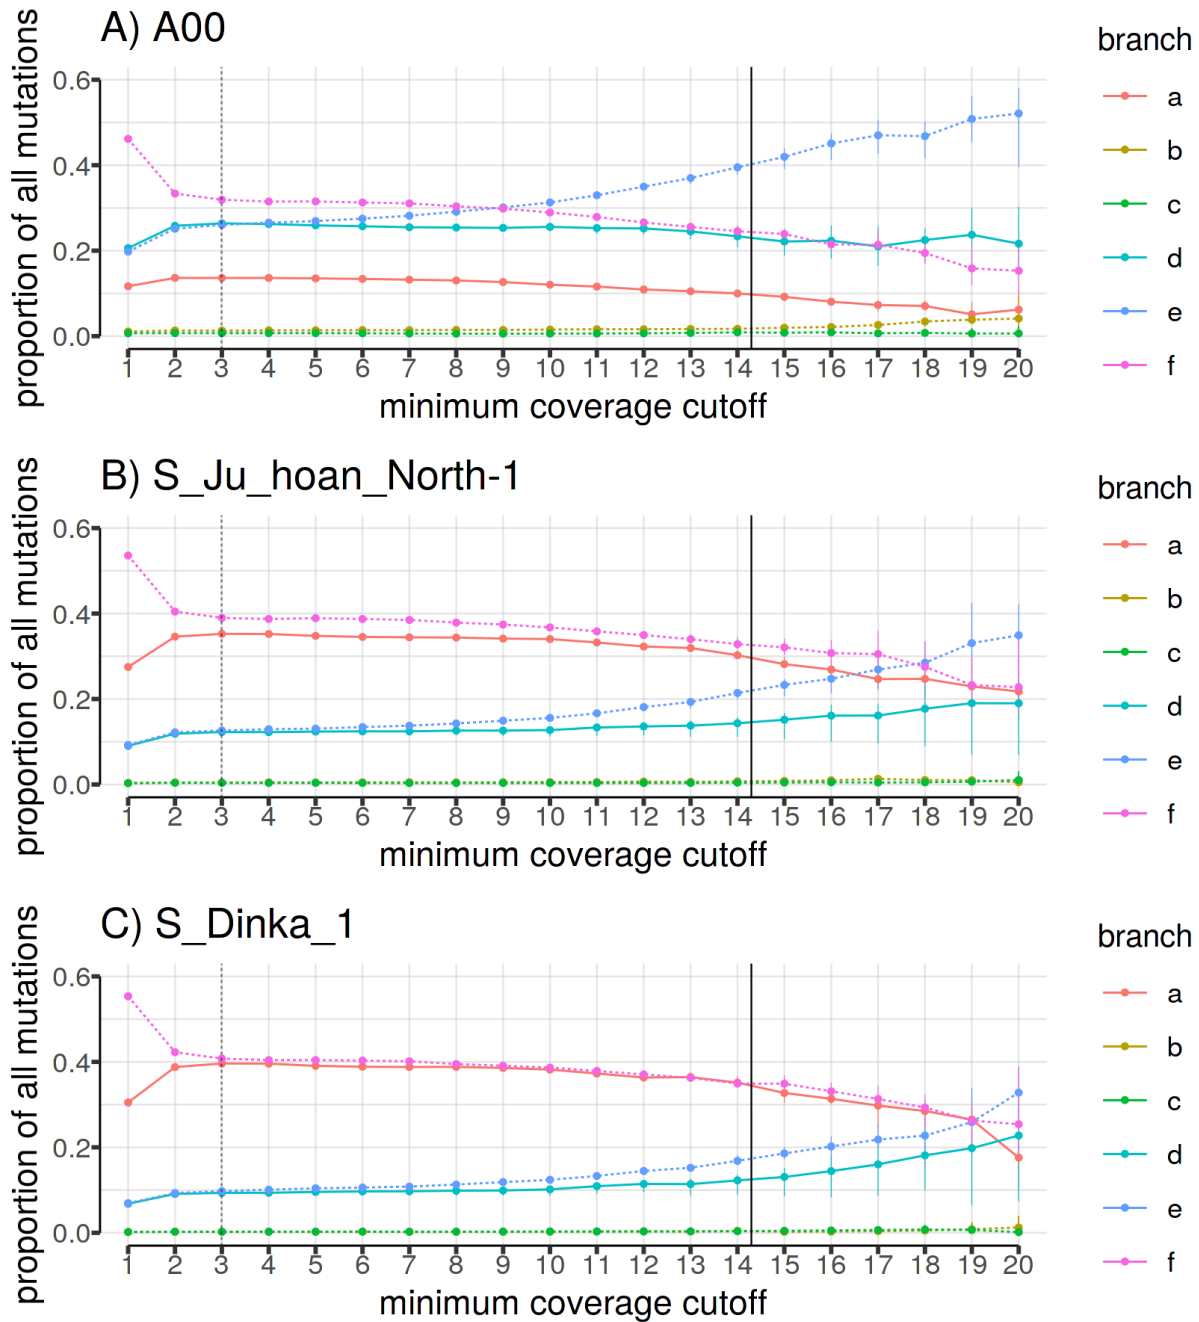

795

796 **Figure S7.8. Relative proportions of branch lengths in the 14.3X *Mezmaiskaya 2***  
797 **capture data as a function of minimum coverage support required for each**  
798 **genotype call. *Mezmaiskaya 2* was chosen for this example because its high coverage**  
799 **makes the branch proportion patterns stand out more clearly. Panels (A), (B) and (C)**

800 show results based on three different African Y chromosomes used to define branch e  
801 (Figure S7.4). Branch length proportions (colored lines) were calculated as  $\frac{a}{N}, \frac{b}{N}, \dots, \frac{f}{N}$ ,  
802 where  $N = a + b + \dots + f$ , using the complete 6.9 Mb capture data of *Mezmaiskaya 2*.  
803 Vertical dotted lines indicate a 3X lower coverage cutoff used throughout our study  
804 (section 5.3). Analysis is based on all polymorphisms. Vertical solid lines indicate the  
805 average coverage in the *Mezmaiskaya 2* individual (14.3X).  
806



**A) New TMRCA statistic**

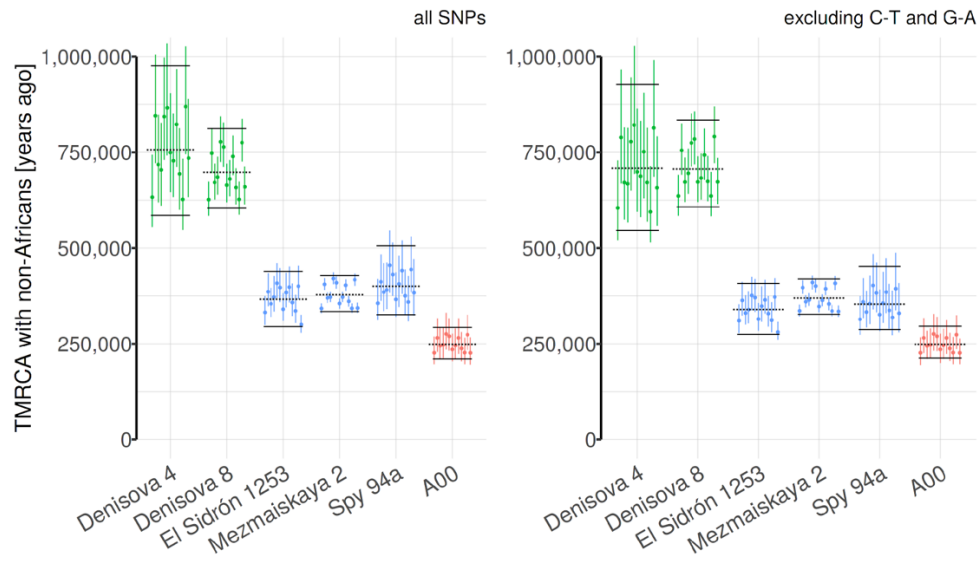

**B) TMRCA statistic of Mendez et al.**

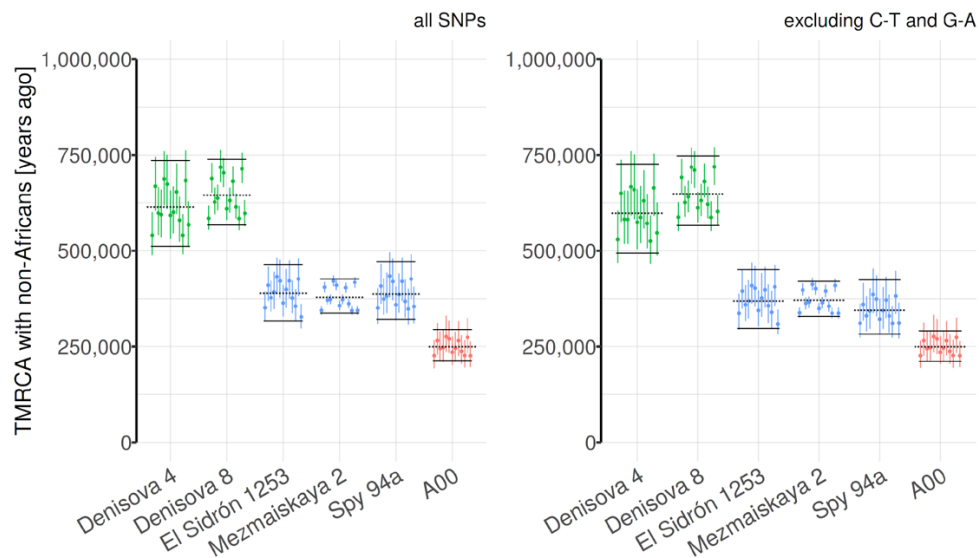

807

808 **Figure S7.9. Comparison of TMRCA estimates obtained using the new statistic and**

809 **the original approach used in the analysis of the *El Sidrón 1253* Neandertal. (A)**

810 **Estimates using our new, more robust TMRCA estimate. (B) Original calculation**

811 **proposed by *Mendez et al.*, 2016 (5). Shown are estimates based on all polymorphisms**

812 **(left panels) and excluding C-to-T or G-to-A polymorphisms which are more likely to be**

813 **caused by aDNA damage (right panels).**

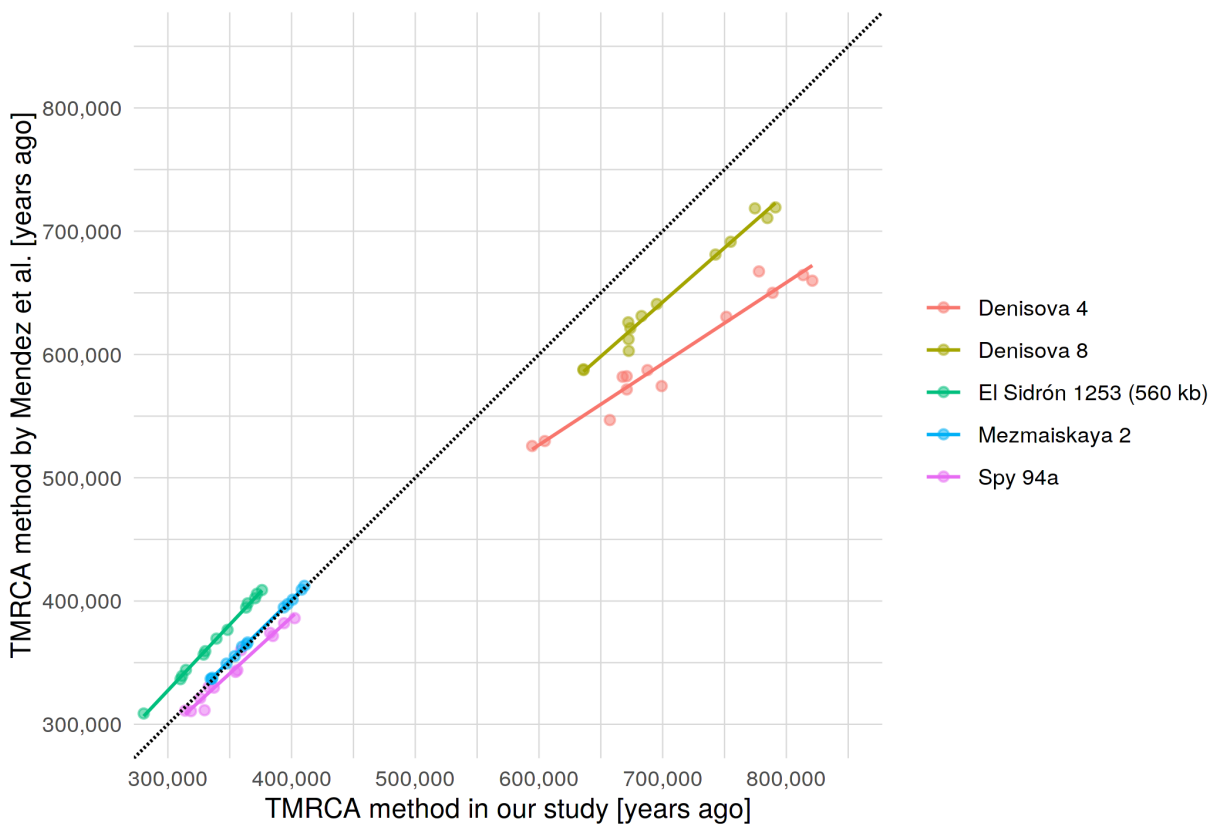

**A) 50% mappability filter**

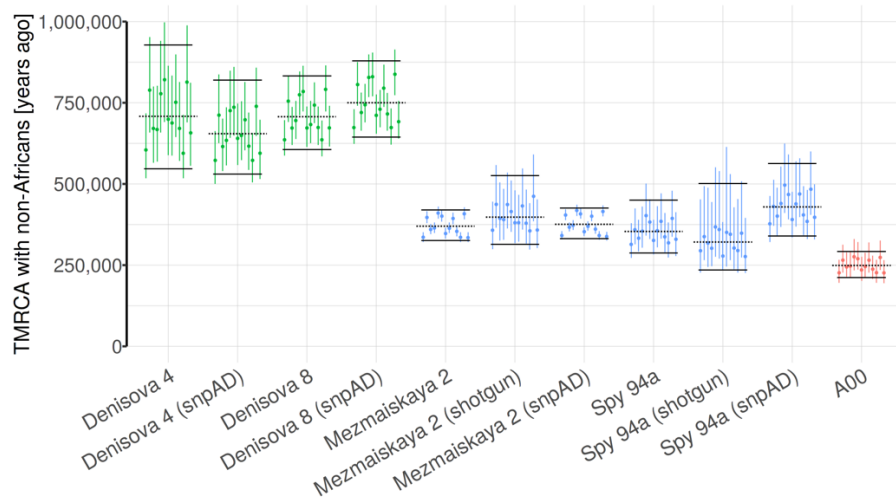

**B) 100% mappability filter**

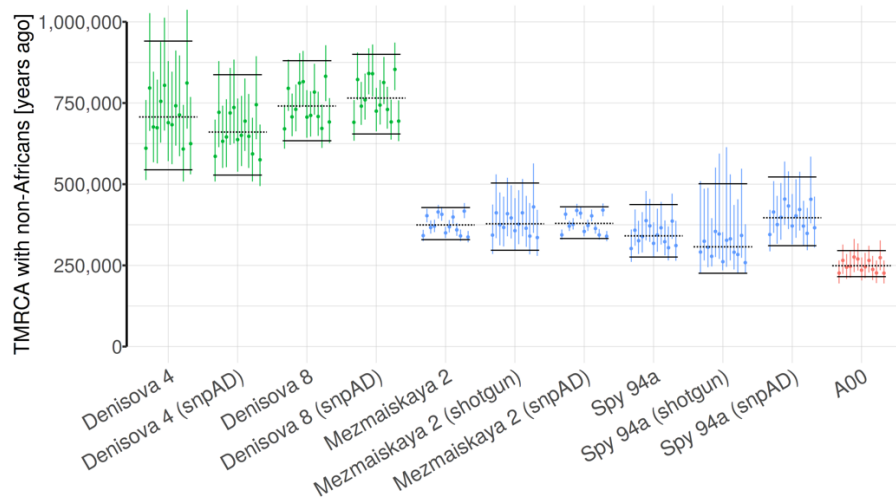

825

826 **Figure S7.11. Detailed evaluation for potential technical biases in our TMRCA**

827 **estimates.** Shown are TMRCA results based on different versions of the data (shotgun

828 or capture) or genotype calling methods (snpAD or consensus-based genotype calling

829 method - which is the default). Panels (A) and (B) show results based on two versions of

830 mappability filters - less strict ("*map35\_50%*") and more strict ("*map35\_100%*") filters

831 described in the Altai Neandertal study (2). Analysis is based on all polymorphisms except

832 C-to-T and G-to-A changes.

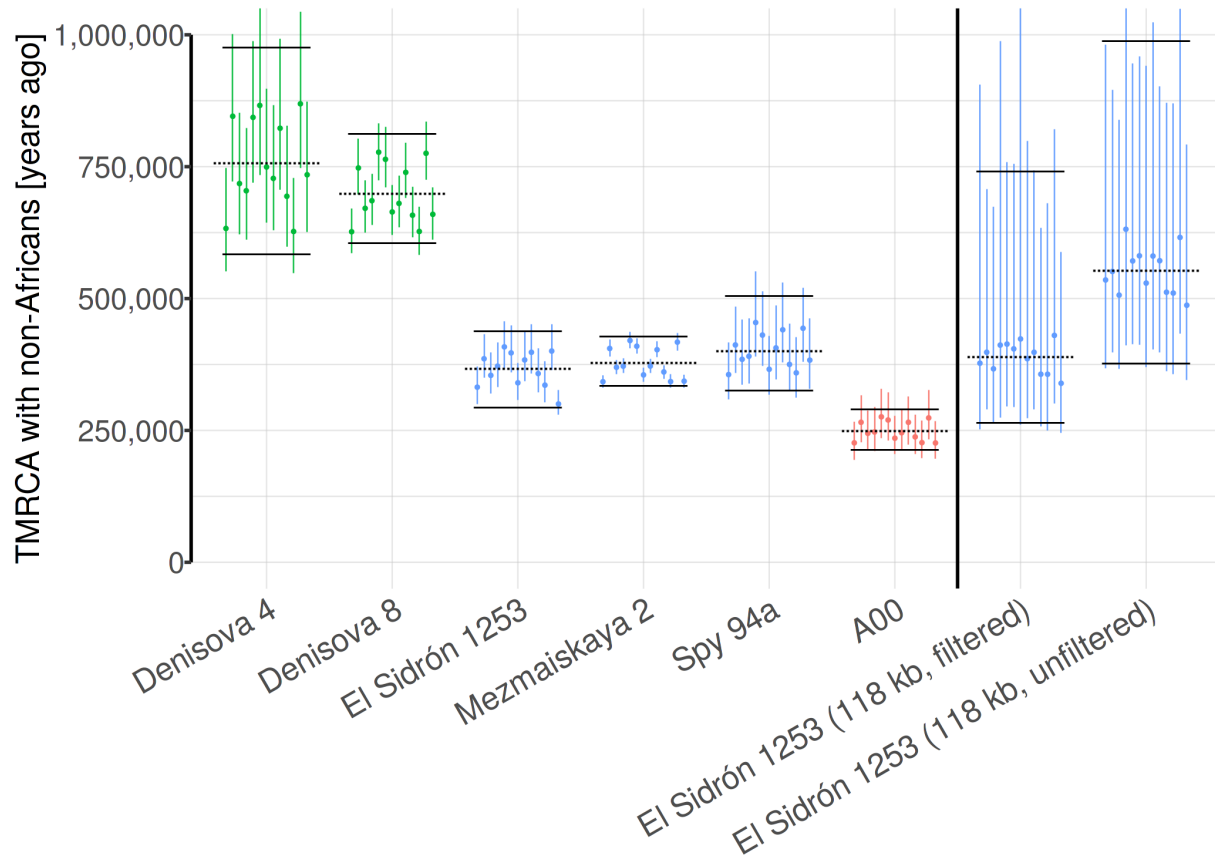

833

834 **Figure S7.12. TMRCA between the *El Sidrón 1253* and modern human Y**

835 **chromosomes.** TMRCA estimates obtained for new capture sequence from the *El Sidrón*

836 *1253* Neanderthal (~370 kya) differ significantly from the previously published results

837 based on the 118 kb of the coding capture sequence (~600 kya, “118 kb, unfiltered”

838 column on the right from the vertical line). We found that applying stricter filtering criteria

839 results in the same TMRCA values we obtain for the new capture data (“118 kb, filtered”

840 column on the right from the vertical line). Analysis is based on all polymorphisms.

841

842

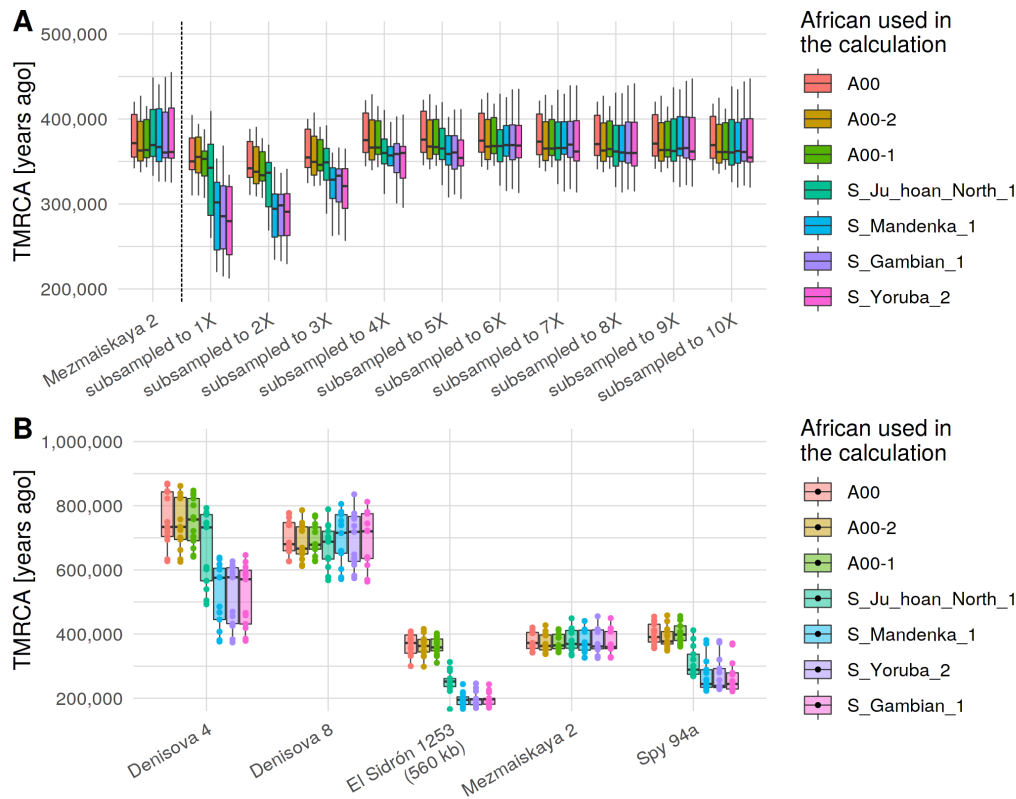

843

844 **Figure S7.13. Estimates of  $TMRCA_{archaic}$  for different African Y chromosomes used**

845 **in the calculation. (A) Results for the high-coverage 14.3X *Mezmaiskaya 2* capture data**

846 (left of the vertical line) and its subsets generated by downsampling. A00-based TMRCA

847 estimates are quite stable across the entire range of coverage and match those for the

848 full data. In contrast, estimates based on other, less divergent, African Y chromosomes

849 are heavily biased, and this bias is especially strong for low coverage samples. **(B)** A00-

850 based estimates for *Denisova 4*, *El Sidrón 1253* and *Spy 94a* match those for their higher

851 coverage counterparts (*Denisova 8* and *Mezmaiskaya 2*, respectively) as is required by

852 the topology of the phylogenetic tree (Figure 2A). However, estimates based on other

853 African individuals show the same bias shown for low coverage samples in panel (A).

854 Dots show TMRCA estimates based on 13 non-African individuals. Both analyses are

855 based on all polymorphisms.

856

857

| name           | a     | b    | c    | d     | e     | f     | total       | TMRCA [years ago] | TMRCA (lower CI) | TMRCA (upper CI) |
|----------------|-------|------|------|-------|-------|-------|-------------|-------------------|------------------|------------------|
| Denisova 4     | 142.2 | 2.0  | 2.2  | 77.8  | 125.8 | 165.9 | 1,084,363.6 | 708,133.1         | 549,422.5        | 930,979.7        |
| Denisova 8     | 583.5 | 8.8  | 8.5  | 318.0 | 410.4 | 583.9 | 3,372,262.6 | 706,874.9         | 607,187.2        | 833,211.4        |
| Mezmaiskaya 2  | 301.8 | 13.8 | 16.4 | 625.1 | 609.1 | 651.9 | 5,349,303.5 | 369,637.7         | 326,137.1        | 419,311.0        |
| Spy 94a        | 17.4  | 4.5  | 0.2  | 42.0  | 49.5  | 87.6  | 510,735.5   | 353,265.5         | 286,250.7        | 449,185.5        |
| El Sidrón 1253 | 27.9  | 0.0  | 2.5  | 78.8  | 38.2  | 62.3  | 414,420.4   | 339,207.2         | 274,711.4        | 408,161.1        |

858

859 **Table S7.3. Observed branch counts and estimates of TMRCA between archaic and**

860 **modern human Y chromosomes.** All quantities represent averages across a panel of

861 13 non-African Y chromosomes (Table S7.1) and are based on A00-based estimates of

862 mutation rate and  $TMRCA_{AFR}$  (section 7.1). Counts in columns *a* to *f* represent counts of

863 site patterns as shown in Figures S7.4 and S7.5. “Total” represents the number of sites

864 out of the total 6.9 Mb of target sequence available for the analysis.

865

### 866 7.3. TMRCA of *Mezmaiskaya 2* and *Spy 94a*

867 The split time of Neandertal and modern human Y chromosomes estimated in the  
868 previous section provides an upper bound for the last time the two populations  
869 experienced gene flow. Similarly, the deepest divergence in late Neandertal Y  
870 chromosomes represents a lower bound, as the introgressed Y chromosome lineage  
871 must have already been present in Neandertals prior to this diversification.

872 To estimate the deepest TMRCA of the known Neandertal Y chromosomes (*i.e.*  
873 the TMRCA of *Mezmaiskaya 2* and *Spy 94a*, Figure 2A), we first defined a set of sites in  
874 the ~6.9 Mb capture target regions which carry a reference allele in the chimpanzee, A00  
875 and French Y chromosomes (the ancestral state) and an alternative allele (the derived  
876 state) on the branch leading to the high-coverage Y chromosome of *Mezmaiskaya 2*  
877 (Figure S7.14), using the standard filtering used in previous sections (minimum three  
878 reads covering each genotyped site, section 5.3). We can calculate the approximate  
879 length of this branch using the TMRCA of *Mezmaiskaya 2* and modern human Y  
880 chromosomes (~370 kya, Table S7.3) and the known age of *Mezmaiskaya 2* (~44 kya,  
881 (11)) as 370 kya – 44 kya = 326 ky (Figure S7.14). We can then estimate the split time  
882 between *Mezmaiskaya 2* and *Spy 94a* Y chromosomes using the proportion of  
883 *Mezmaiskaya*-derived sites which show the ancestral allele in *Spy 94a* (Figure S7.14).  
884 Specifically, if we let  $Y$  be the number of ancestral alleles observed in *Spy 94a* and  $X + Y$   
885 be the total number of sites with genotype calls in *Spy 94a* at positions derived in  
886 *Mezmaiskaya 2*, we can express the TMRCA of Y chromosomes of the two Neandertals  
887 simply as

$$888 \quad \frac{Y}{X+Y} \times 326 + 44 \text{ kya} \quad (6)$$

889 (Figure S7.14). We maximized the amount of data available for the analysis by merging  
890 the capture data with previously published shotgun sequences (11) and evaluated the  
891 robustness of the results to different genotype filtering and classes of polymorphisms. To  
892 estimate confidence intervals (C.I.), we re-sampled the  $X$  and  $Y$  counts from Poisson  
893 distributions with expected values given by the observed counts (Figure S7.14),  
894 calculated the TMRCA on the re-sampled counts using equation (6) and then took the  
895 2.5% and 97.5% quantiles of this simulated TMRCA distribution to arrive at the  
896 approximate range of 95% C.I.

897         The TMRCA of *Mezmaiskaya 2* and *Spy 94a* are consistently around ~100 kya  
898 regardless of the filtering criteria used (individual point estimates and 95% confidence  
899 intervals shown in Figure S7.15 and Table S7.4). Together with the TMRCA of Neandertal  
900 and modern human Y chromosomes, this suggests that the gene flow from an early  
901 population related to modern humans is likely to have happened some time between ~100  
902 kya and ~370kya. We note that this time window is significantly wider than the one  
903 inferred based on a much more extensive set of available Neandertal mtDNA genomes  
904 (219-468 kya) (38). However, it is likely that future sampling of Neandertal Y chromosome  
905 diversity will reveal more basal Y chromosome lineages as has been the case for  
906 Neandertal mtDNA (38).

907



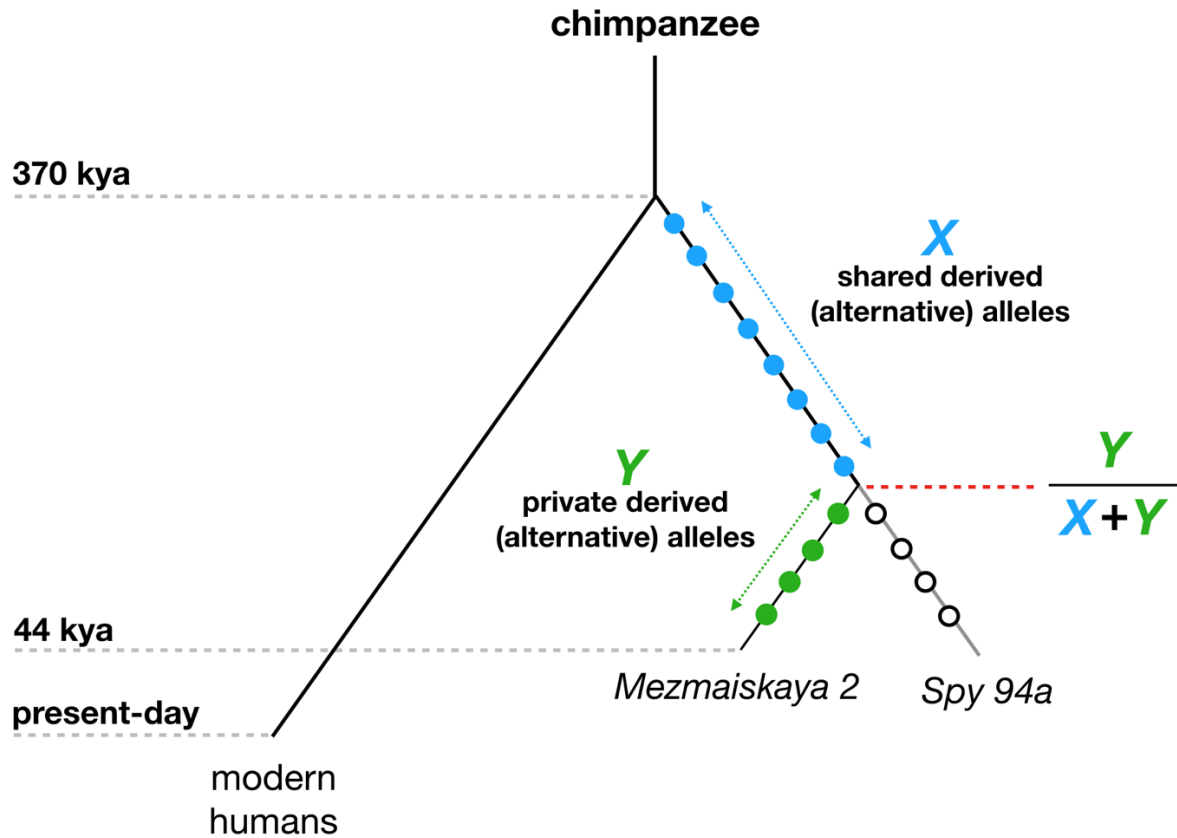

908

909

910 **Figure S7.14. Estimating the TMRCA of Neandertal Y chromosomes.** Filled circles

911 represent a set of derived (alternative) alleles on the high-coverage *Mezmaiskaya 2*

912 lineage, and are defined as sites at which *Mezmaiskaya 2* Y chromosome carries a

913 different allele than chimpanzee, A00 and French Y chromosomes. Empty circles

914 represent a subset of such sites which show the ancestral (reference) state in *Spy 94a*.

915

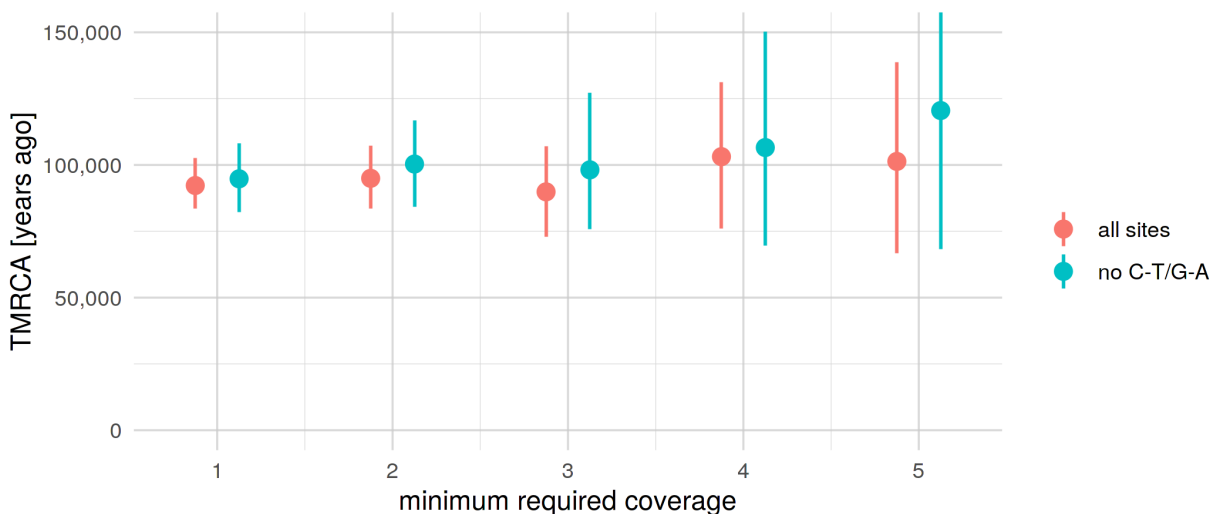

916

917

918 **Figure S7.15. TMRCA of *Mezmaiskaya 2* and *Spy 94a*.** Informative positions (derived

919 alleles in *Mezmaiskaya 2*) were defined using genotype calls in *Mezmaiskaya 2* which

920 passed the standard filtering used throughout our study (minimum coverage of at least

921 three reads, maximum coverage less than 98% quantile of the total coverage distribution).

922 We called the genotypes in the *Spy 94a* Y chromosome at these positions and calculated

923 the TMRCA using the equation (6). We tested the robustness of the estimate to genotype

924 calling errors using different minimum coverage filters for *Spy 94a* (x-axis) and two sets

925 of polymorphisms (colors).

926

927

928

| REF count | ALT count | proportion REF | TMRCA     | TMRCA (lower CI) | TMRCA (upper CI) | minimum coverage | calculated on |
|-----------|-----------|----------------|-----------|------------------|------------------|------------------|---------------|
| 71        | 469       | 0.1315         | 92250.32  | 83814.88         | 102157.6         | 1                | all sites     |
| 51        | 314       | 0.1397         | 94962.33  | 83315.75         | 107309.6         | 2                | all sites     |
| 20        | 141       | 0.1242         | 89862.87  | 74453.89         | 108808.4         | 3                | all sites     |
| 13        | 66        | 0.1646         | 103130.37 | 77184.06         | 129130.5         | 4                | all sites     |
| 7         | 37        | 0.1591         | 101332.33 | 67250.74         | 141779.7         | 5                | all sites     |
| 43        | 266       | 0.1392         | 94775.67  | 82515.76         | 108105.1         | 1                | no C-T/G-A    |
| 32        | 173       | 0.1561         | 100347.68 | 83703.34         | 117665.3         | 2                | no C-T/G-A    |
| 13        | 74        | 0.1494         | 98152.86  | 75463.15         | 125756.6         | 3                | no C-T/G-A    |
| 7         | 33        | 0.1750         | 106565.56 | 69559.13         | 149511.3         | 4                | no C-T/G-A    |
| 5         | 18        | 0.2174         | 120510.02 | 67229.10         | 180578.4         | 5                | no C-T/G-A    |

929

930

931

932 **Table S7.4. Point estimates and 95% C.I. for the TMRCA of *Mezmaiskaya 2* and *Spy***

933 **94a Y chromosomes as shown in Figure S7.15.**

934

935

936           7.4. Confidence intervals

937 Under the assumption that mutations on each branch of a tree (Figures S7.1 and S7.4)  
938 accumulate independently, the observed counts of mutations can be understood as  
939 realizations of independent Poisson processes (mutation counts in Tables S7.2 and  
940 S7.3). To quantify the uncertainty in our TMRCA estimates, we used a simulation-based  
941 bootstrapping approach. For each set of branch lengths used to calculate scaling factor  
942  $\alpha$  (branches  $a, d$  and  $e$ , Table 7.3), we generated 1000 sets of simulated counts by  
943 randomly sampling from a Poisson distribution with the parameter  $\lambda$  set to values  
944 observed from the data. In other words, we simulated “trees” implicitly by generating a  
945 set of Poisson-distributed branch lengths. We then used the simulated counts to estimate  
946 the corresponding TMRCA values, obtaining a distribution of TMRCA consistent with the  
947 observed data. Finally, we took the lower 2.5% and upper 97.5% quantiles of the  
948 simulated distribution as the boundaries of bootstrap-based 95% confidence intervals.

949           To estimate the confidence interval for TMRCA across the whole panel of 13 non-  
950 African Y chromosomes (black dotted horizontal lines in TMRCA figures in our study such  
951 as Figure 2B), we followed the same procedure but pooled all simulated counts together  
952 (i.e., 1000 simulated counts for each of the 13 Y chromosomes). Then, we took the lower  
953 2.5% and upper 97.5% quantiles of TMRCA estimates calculated from the pooled counts.

954

955

956

## 957 8. Simulations of introgression under purifying selection

958 To investigate the expected frequency trajectories of Y chromosomes introgressed from  
959 modern humans into Neandertals, we adapted a modeling approach previously used to  
960 study negative selection against Neandertal DNA in modern humans (39, 40). Briefly, this  
961 model assumes lower effective population size ( $N_e$ ) in Neandertals than modern humans  
962 as inferred from comparisons of whole-genome sequences (2). Under nearly-neutral  
963 theory, such differences in  $N_e$  are expected to increase the genetic load in Neandertals  
964 compared to modern humans through an excess of accumulated deleterious mutations  
965 due to lower efficacy of purifying selection. Therefore, after introgression from  
966 Neandertals into modern humans, Neandertal haplotypes would be under stronger  
967 negative selection compared to modern humans haplotypes, causing a rapid decrease in  
968 proportion of genome-wide Neandertal ancestry (39, 40).

969 In the context of evidence for Neandertal Y chromosome replacement in our study,  
970 we were particularly interested in the dynamics of introgression in the opposite direction,  
971 from modern humans into Neandertals. Specifically, given that nearly-neutral theory  
972 predicts that Neandertal Y chromosomes would carry a higher load of deleterious  
973 mutations compared to modern human Y chromosomes, how much is natural selection  
974 expected to favor introgressed modern human Y chromosomes compared to their original  
975 Neandertal counterparts?

976

977 To address this question, we used a forward population genetic simulation framework  
978 SLiM (version 3.3) (41) to build an approximate model of modern human and Neandertal  
979 demographic histories, following a strategy we used to study the long-term effects of

980 Neandertal DNA in modern humans (40). To simulate differences in  $N_e$  of both  
981 populations, we set  $N_e = 10,000$  in modern humans and  $N_e = 1,000$  in Neandertals after  
982 the split of both lineages from each other at 600,000 years ago. Given the non-  
983 recombining nature of the human Y chromosome, we implemented a simplified model of  
984 a genomic structure in which the only parameter of interest is the total amount of  
985 sequence under selection (“functional” sequence, ranging from 100 kb to 2 Mb in steps  
986 of 100 kb), and set the recombination rate to zero. Furthermore, because the amount of  
987 deleterious variation accumulated on both lineages is directly related the time they have  
988 been separated from each other, we simulated gene flow from modern humans into  
989 Neandertals between 150,000 to 450,000 years ago in steps of 25,000 years (this time  
990 range for gene flow encompasses the times inferred by (38, 42, 43) and our own study),  
991 assuming a fixed split time of 600,000 years ago. We ran 100 independent replicates for  
992 each combination of parameters described above, including an initial burn-in phase of  
993 70,000 generations ( $7 \times$  ancestral  $N_e$  of 10,000) to let the simulations reach the state of  
994 mutation-selection-drift equilibrium.

995         In our previous study, we found evidence for different modes of selection in  
996 different classes of functionally important genomic regions, suggesting that the fitness  
997 consequences of mutations vary significantly according to the position of their occurrence  
998 (40). Realistic modeling of negative selection and introgression would thus require precise  
999 information about the distributions of fitness effects (DFE), dominance and epistasis for  
1000 coding, non-coding and regulatory regions. Unfortunately, with the exception of DFE of  
1001 amino acid changing *de novo* mutations affecting autosomal genes (44, 45), little is known  
1002 about fitness consequences of non-coding and regulatory mutations on the Y

1003 chromosome. Furthermore, the impact of Y chromosome structural variation in the  
1004 context of male fertility is highly significant, but still relatively poorly understood in terms  
1005 of its DFE (46, 47). These issues, as well as the large parameter space of all relevant  
1006 demographic and selection factors make analyzing the model dynamics quite challenging.  
1007 To make our results easier to interpret, we scored each simulation run (i.e., each  
1008 introgression frequency trajectory) with the ratio of fitness values of the average  
1009 Neandertal Y chromosome and the average modern human Y chromosome generated  
1010 by the simulation, just prior to the introgression. This way we collapse many potential  
1011 parameters into a single relevant measure (how much worse are Neandertal Y  
1012 chromosomes compared to modern human Y chromosomes in terms of evolutionary  
1013 fitness) while, at the same time, generalizing our conclusions to other potential factors we  
1014 do not model explicitly.

1015 To calculate the fitness of simulated Y chromosomes, we used the fact that  
1016 mutations in SLiM behave multiplicatively, i.e. each mutation affects any individual's  
1017 fitness independently of other mutations. Following basic population genetics theory (48),  
1018 if we let the fitness of an individual be  $W$  and the fitness of each mutation be  $w_i$ , we can  
1019 define  $W$  as  $W = \prod w_i = \prod (1 - s_i)$ , where  $i$  runs across all mutations carried by this  
1020 individual and  $s_i$  is the selection coefficient of the  $i$ -th deleterious mutation. We can then  
1021 transform multiplicative interaction into log-additive interaction by

$$1022 \quad W = \prod w_i = e^{\sum \log w_i} = e^{\sum \log(1-s_i)} \approx e^{\sum(-s_i + \frac{s_i^2}{2})} \approx e^{-\sum s_i}, \quad (7)$$

1023 using simple rules of Taylor expansion under the assumption that we are dealing with  
1024 weakly deleterious mutations whose selection coefficients ( $s_i$ ) are expected to be very  
1025 small (48).

1026

1027 In practice, we let each simulation replicate run until modern human introgression into  
1028 Neandertals, at which point we saved all Neandertal and modern human Y chromosomes  
1029 and their mutations to a SLiM population output file. After introgression, which we  
1030 simulated at 5%, we tracked the frequency of modern human Y chromosomes in  
1031 Neandertals for 100,000 years, saving the frequency values at regular time intervals to  
1032 another output file.

1033 For the downstream analyses, we calculated the fitnesses of all Neandertal and  
1034 modern human Y chromosomes from the population output files saved in the first step  
1035 using equation (7) and calculated the ratio of the mean fitness values in both populations  
1036 – this measure quantifies the expected decrease in fitness of Neandertal Y chromosomes  
1037 compared to modern human Y chromosomes. The distribution of simulated fitness ratios  
1038 across a two-dimensional parameter grid is shown in Figure S8.1. As expected, longer  
1039 times of separation between Neandertals and modern humans and larger amounts of  
1040 mutational target sequence increases the average genetic load of Neandertals. To  
1041 analyze the dynamics of introgression in Neandertals over time, we scored the simulated  
1042 modern human Y chromosome frequency trajectories with the calculated fitness decrease  
1043 obtained from the simulation (Figure S8.2). Finally, we estimated the expected probability  
1044 of replacement of the original Neandertal Y chromosomes over time by counting the  
1045 proportion of the simulated trajectories (over all trajectories in each fitness bin) in which  
1046 the introgressed modern human Y chromosomes reached fixation in each time point  
1047 (Figure S8.2). These trajectories of replacement probabilities are shown in Figure 3B.



1048 Similarly to Figure S8.1, Figure S8.3 shows these probabilities expanded from the single  
1049 fitness reduction score back on the two-dimensional parameter grid.

1050 We note that although the simulation setup presented here is specific to Y  
1051 chromosomes, the conclusions based on the abstract measure of fitness reduction can  
1052 be generalized even to the case of mtDNA introgression (Figure 3B).

1053

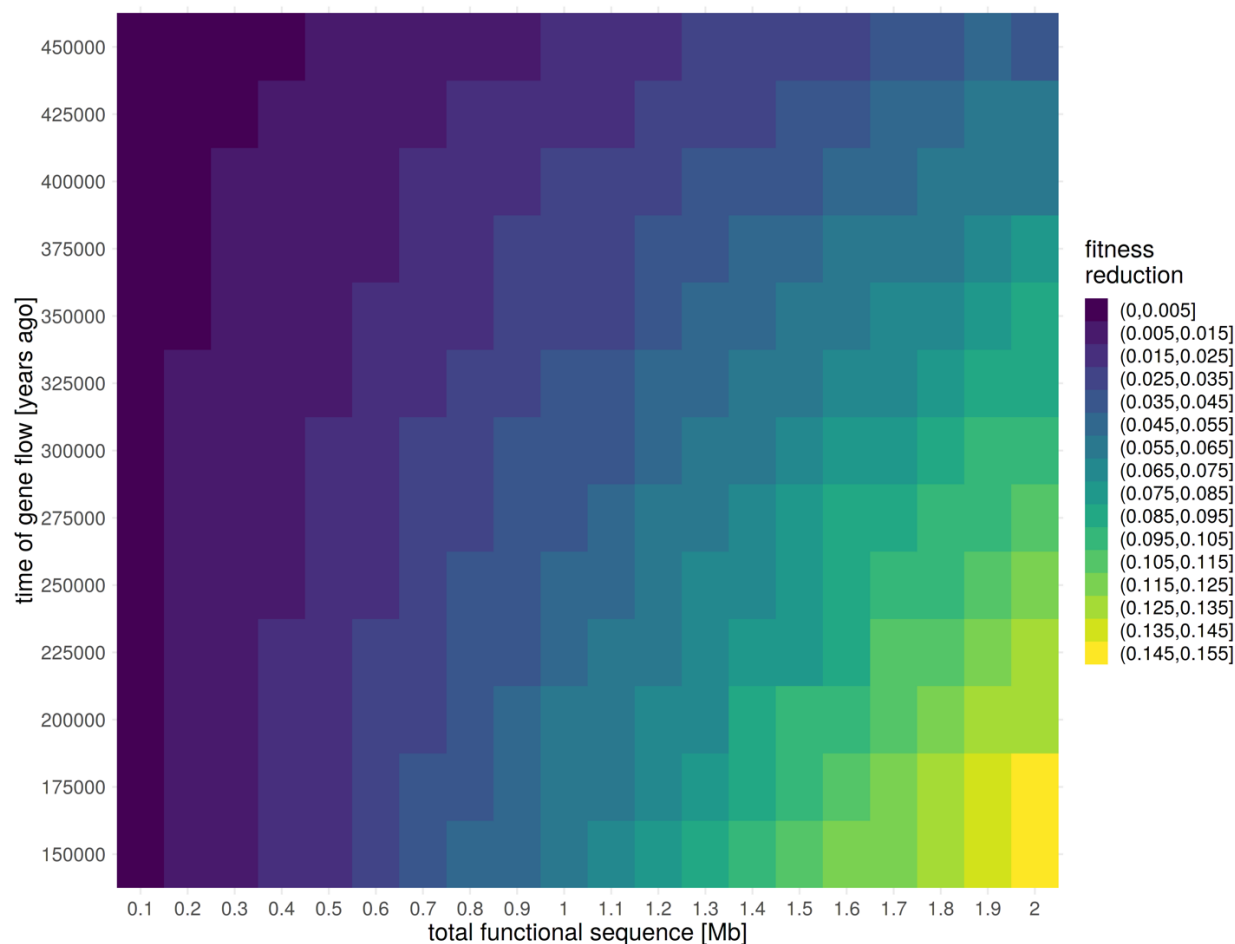

1054

1055

1056 **Figure S8.1. Expected decrease in fitness of an average Neandertal Y chromosome**

1057 **compared to an average modern human Y chromosome.** Fitness decrease values

1058 were averaged over 100 independent simulation replicates on a grid of two parameters

1059 as the ratios of the mean fitness of Neandertal Y chromosomes to the mean fitness of

1060 modern human Y chromosomes (calculated using equation 7). Lighter colors represent

1061 lower fitness of Neandertal Y chromosomes compared to modern human Y

1062 chromosomes.

1063

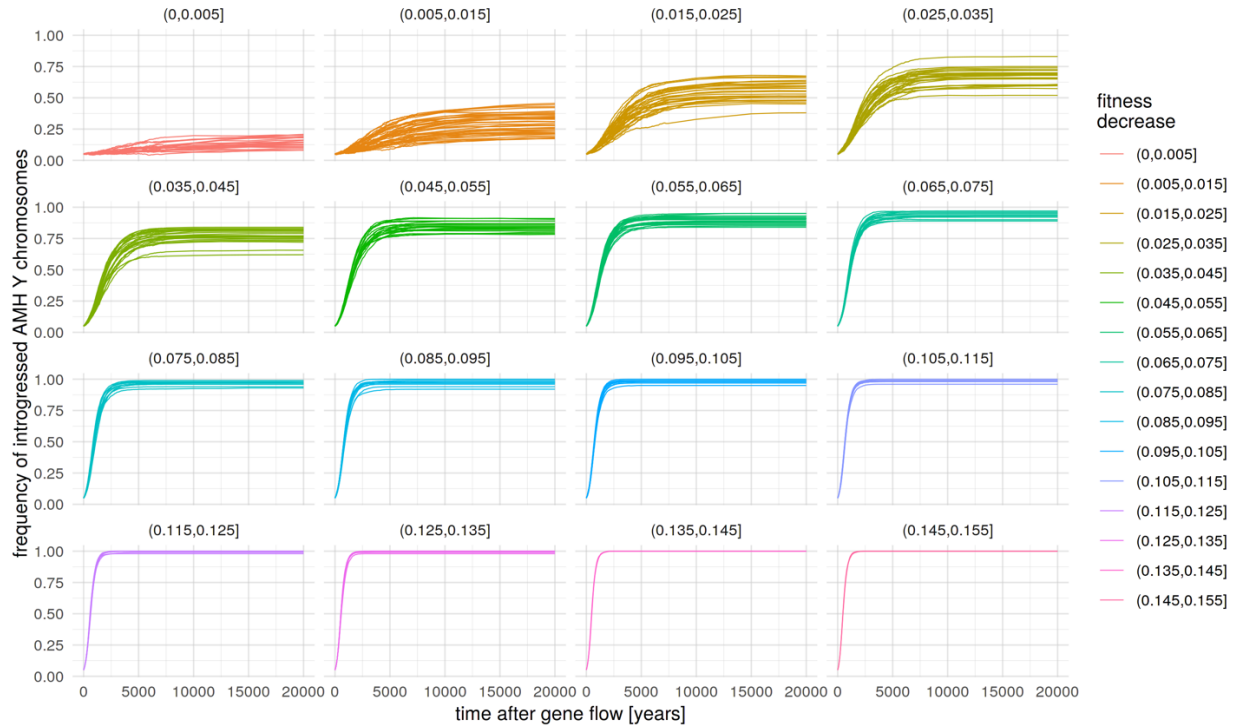

1064

1065

1066 **Figure S8.2. Frequency trajectories of introgressed modern human Y**

1067 **chromosomes in Neandertals, partitioned by the fitness decrease of Neandertal Y**

1068 **chromosomes compared to modern human Y chromosomes.**

1069

1070

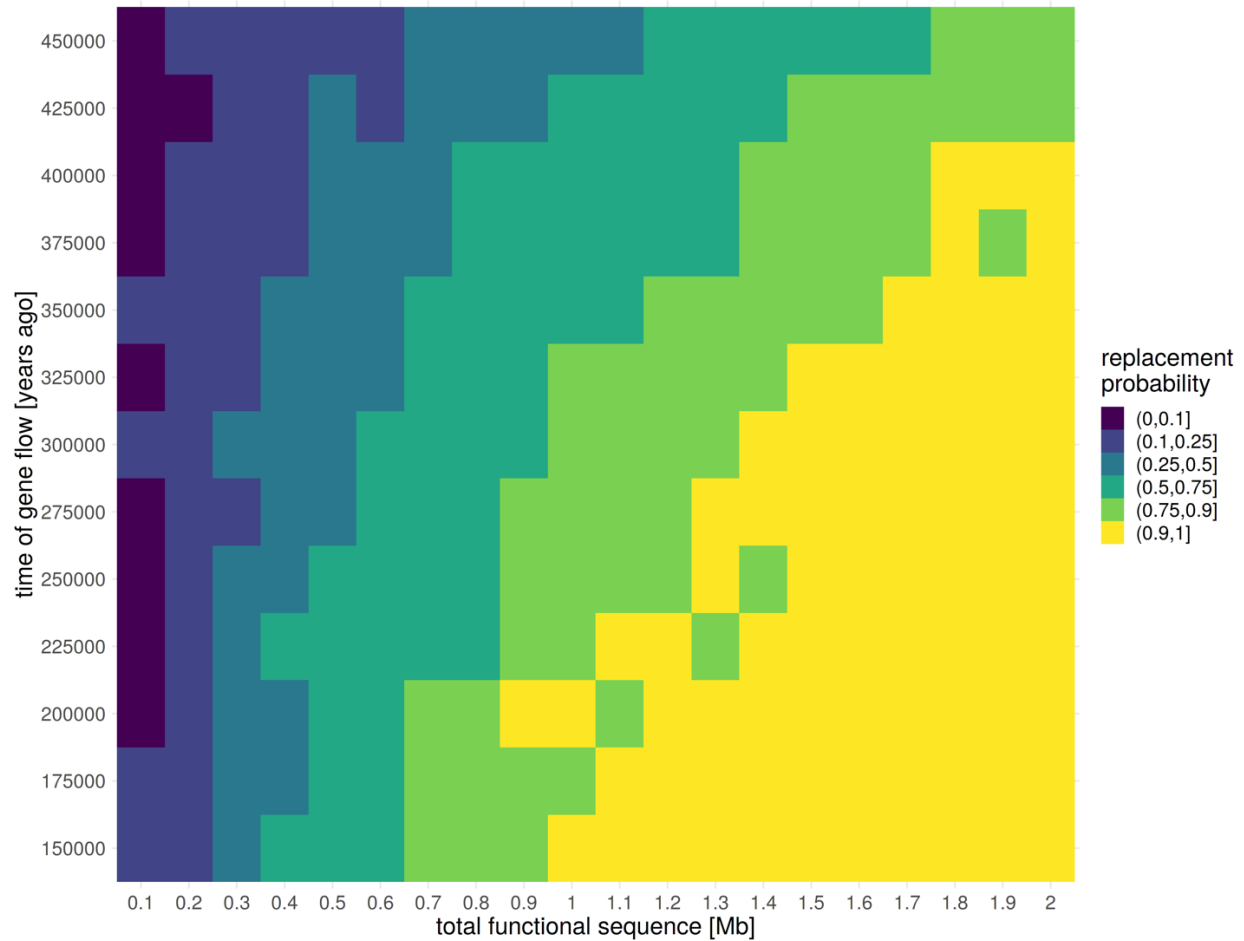

1071

1072

1073 **Figure S8.3. Probability of replacement of a Neandertal Y chromosome at 20**

1074 **thousand years after gene flow from modern human.** Probabilities represent the

1075 proportion of introgressed modern human Y chromosome trajectories that reached

1076 fixation in the Neandertals after 20 thousand years after gene flow, out of the total 100

1077 simulation replicates performed for each combination of two-dimensional parameters

1078 (Figure S8.2).

1079

1080

- 1081  
1082 1. G. Benson, *Nucleic Acids Res* **27**, (1999).  
1083 2. K. Prüfer *et al.*, *Nature* **505**, 43 (2014).  
1084 3. Q. Fu *et al.*, *Proceedings of the National Academy of Sciences* **110**, 2223 (2013).  
1085 4. S. Castellano *et al.*, *Proceedings of the National Academy of Sciences* **111**, 6666 (2014).  
1086 5. F. Mendez, G. Poznik, S. Castellano, C. Bustamante, *The American Journal of Human*  
1087 *Genetics* **98**, 728 (2016).  
1088 6. S. Lippold *et al.*, *Investig Genet* **5**, 13 (2014).  
1089 7. J. Dabney *et al.*, *Proceedings of the National Academy of Sciences* **110**, 15758 (2013).  
1090 8. P. Korlević *et al.*, *BioTechniques* **59**, (2015).  
1091 9. I. Glocke, M. Meyer, *Genome Res* **27**, 1230 (2017).  
1092 10. N. Rohland, I. Glocke, A. Aximu-Petri, M. Meyer, *Nat Protoc* **13**, 2447 (2018).  
1093 11. M. Hajdinjak *et al.*, *Nature* **555**, 652 (2018).  
1094 12. M. T. Gansauge, M. Meyer, *Nat Protoc* **8**, 737 (2013).  
1095 13. M.-T. Gansauge *et al.*, *Nucleic Acids Research* gkx033 (2017).  
1096 14. V. Slon *et al.*, *Sci Adv* **3**, e1700186 (2017).  
1097 15. M. Kircher, S. Sawyer, M. Meyer, *Nucleic Acids Res* **40**, e3 (2012).  
1098 16. J. Dabney, M. Meyer, *BioTechniques* **52**, (2012).  
1099 17. G. Renaud, U. Stenzel, J. Kelso, *Nucleic Acids Research* **42**, e141 (2014).  
1100 18. H. Li, R. Durbin, *Bioinformatics* **25**, 1754 (2009).  
1101 19. H. Li *et al.*, *Bioinformatics* **25**, 2078 (2009).  
1102 20. S. Mallick *et al.*, *Nature* **538**, 201 (2016).  
1103 21. M. Karmin *et al.*, *Genome Research* **25**, 459 (2015).  
1104 22. Q. Fu *et al.*, *Nature* **514**, 445 (2014).  
1105 23. F. L. Mendez *et al.*, *Am J Hum Genet* **92**, 454 (2013).  
1106 24. A. R. Quinlan, I. M. Hall, *Bioinformatics* **26**, 841 (2010).  
1107 25. A. W. Briggs *et al.*, *Proceedings of the National Academy of Sciences* **104**, 14616 (2007).  
1108 26. T. Günther, C. Nettelblad, *PLoS Genet* **15**, e1008302 (2019).  
1109 27. H. Li, *Bioinformatics* **27**, 2987 (2011).  
1110 28. K. Prüfer, *Bioinformatics* **34**, 4165 (2018).  
1111 29. T. Kivisild, *Hum Genet* **136**, 529 (2017).  
1112 30. K. P. Schliep, *Bioinformatics* (2011).  
1113 31. E. Paradis, K. Schliep, *Bioinformatics* (2019).  
1114 32. M. K. Kuhner, J. Felsenstein, *Molecular biology and evolution* **11**, 459 (1994).  
1115 33. G. Yu, D. K. Smith, H. Zhu, Y. Guan, T. T.-Y. Lam, *Methods in Ecology and Evolution* **8**,  
1116 28 (2017).  
1117 34. K. Douka *et al.*, *Nature* **565**, 640 (2019).  
1118 35. P. Hallast *et al.*, *Molecular Biology and Evolution* **32**, 661 (2015).  
1119 36. C. Barbieri *et al.*, *Human Genetics* **135**, 541 (2016).  
1120 37. P. Hallast *et al.*, *Genome Research* **26**, 427 (2016).  
1121 38. C. Posth *et al.*, *Nat Commun* **8**, 16046 (2017).  
1122 39. K. Harris, R. Nielsen, *Genetics* **203**, 881 (2016).  
1123 40. M. Petr, S. Pääbo, J. Kelso, B. Vernot, *Proc Natl Acad Sci U S A* **116**, 1639 (2019).  
1124 41. B. C. Haller, P. W. Messer, *Molecular biology and evolution* **36**, 632 (2019).  
1125 42. M. J. Hubisz, A. L. Williams, A. Siepel, (2019).  
1126 43. L. Chen, A. B. Wolf, W. Fu, L. Li, J. M. Akey, *Cell* **180**, 677 (2020).

- 1127 44. A. Eyre-Walker, M. Woolfit, T. Phelps, *Genetics* **173**, 891 (2006).  
1128 45. A. R. Boyko *et al.*, *PLoS Genet* **4**, e1000083 (2008).  
1129 46. W. A. Brashear, T. Raudsepp, W. J. Murphy, *Genome Res* **28**, 1841 (2018).  
1130 47. S. Colaco, D. Modi, *Reproductive biology and endocrinology* **16**, 14 (2018).  
1131 48. J. F. Crow, M. Kimura, *An Introduction to Population Genetics Theory* 1970), pp. 591.  
1132

| Specimen      | MPI Sample ID | Amount powder | Extraction performed in this/previous study | Pre-treatment of the bone powder with 0.5% hypochlorite solution | Volume of extraction buffer added | Volume of extraction buffer purified | Volume of extract produced | Extract ID | Extraction protocol and binding buffer used | Purification method    | Library preparation performed in this/previous study | Library ID | P7 index | P5 index | Input volume in library preparation | Library prep. protocol           | UDG treatment | #Library molecules obtained | #Spike-in control molecules obtained |
|---------------|---------------|---------------|---------------------------------------------|------------------------------------------------------------------|-----------------------------------|--------------------------------------|----------------------------|------------|---------------------------------------------|------------------------|------------------------------------------------------|------------|----------|----------|-------------------------------------|----------------------------------|---------------|-----------------------------|--------------------------------------|
| Denisova 8    | SP2812        | 15.4 mg       | This                                        | no                                                               | 500 µl                            | 500 µl                               | 50 µl                      | E4231      | 5M40 (Dabney et al., 2013)                  | Manual R               | This                                                 | A9461      | 414      | 34       | 10 µl                               | Gansauge and Meyer, 2013; manual | no            | 1,29E+09                    | 4,27E+05                             |
|               |               |               |                                             |                                                                  |                                   |                                      |                            |            |                                             |                        |                                                      | D6448      | 346      | 18       | 10 µl                               | Gansauge et al. 2017; automated  | no            | 1,55E+09                    | 6,84E+04                             |
|               |               |               |                                             |                                                                  |                                   |                                      |                            |            |                                             |                        |                                                      | G7359      | 418      | 168      | 10 µl                               | Gansauge et al. 2017; automated  | no            | 8,65E+08                    | 4,29E+05                             |
|               |               |               |                                             |                                                                  |                                   |                                      |                            |            |                                             |                        |                                                      | G8329      | 435      | 183      | 10 µl                               | Gansauge et al. 2017; automated  | no            | 1,27E+09                    | 7,18E+05                             |
|               |               |               |                                             |                                                                  |                                   |                                      |                            |            |                                             |                        |                                                      | G8330      | 436      | 184      | 10 µl                               | Gansauge et al. 2017; automated  | no            | 8,43E+08                    | 4,30E+05                             |
|               |               |               |                                             |                                                                  |                                   |                                      |                            |            |                                             |                        |                                                      | A9662      | 415      | 35       | 10 µl                               | Gansauge and Meyer, 2013; manual | no            | 6,12E+09                    | 4,86E+05                             |
| Denisova 4    | SP2976        | 10 mg         | This                                        | no                                                               | 500 µl                            | 500 µl                               | 50 µl                      | E6746      | 2M70 (Glocke and Meyer, 2013)               | Manual R               | This                                                 | D6449      | 347      | 19       | 10 µl                               | Gansauge et al. 2017; automated  | no            | 6,93E+09                    | 7,01E+04                             |
|               |               |               |                                             |                                                                  |                                   |                                      |                            |            |                                             |                        |                                                      | A11437     | 408      | 59       | 10 µl                               | Gansauge et al. 2017; automated  | no            | 1,63E+09                    | 7,83E+05                             |
|               |               |               |                                             |                                                                  |                                   |                                      |                            |            |                                             |                        |                                                      | A19116     | 388      | 11       | 10 µl                               | Gansauge et al. 2017; automated  | no            | 2,67E+09                    | 1,12E+06                             |
|               |               |               |                                             |                                                                  |                                   |                                      |                            |            |                                             |                        |                                                      | A19248     | 466      | 135      | 10 µl                               | Gansauge et al. 2017; automated  | no            | 3,53E+09                    | 1,38E+06                             |
|               |               |               |                                             |                                                                  |                                   |                                      |                            |            |                                             |                        |                                                      | A19443     | 319      | 57       | 10 µl                               | Gansauge et al. 2017; automated  | no            | 3,09E+09                    | 1,22E+06                             |
|               |               |               |                                             |                                                                  |                                   |                                      |                            |            |                                             |                        |                                                      | A19637     | 441      | 188      | 10 µl                               | Gansauge et al. 2017; automated  | no            | 2,51E+09                    | 9,26E+05                             |
| Spy 94a       | SP3818        | 14.5 mg       | Previous                                    | yes                                                              | 500 µl                            | 500 µl                               | 50 µl                      | E3342      | 5M40 (Dabney et al., 2013)                  | Manual R               | Previous                                             | R5556      | 432      | 62       | 10 µl                               | Gansauge and Meyer, 2013; manual | no            | 1,41E+08                    | 1,00E+06                             |
|               |               |               |                                             |                                                                  |                                   |                                      |                            |            |                                             |                        |                                                      | A9416      | 410      | 10       | 10 µl                               | Gansauge and Meyer, 2013; manual | no            | 3,96E+07                    | 3,14E+05                             |
|               |               |               |                                             |                                                                  |                                   |                                      |                            |            |                                             |                        |                                                      | A9417      | 411      | 11       | 10 µl                               | Gansauge and Meyer, 2013; manual | no            | 4,49E+07                    | 4,43E+05                             |
|               |               |               |                                             |                                                                  |                                   |                                      |                            |            |                                             |                        |                                                      | A9418      | 412      | 12       | 10 µl                               | Gansauge and Meyer, 2013; manual | no            | 3,57E+07                    | 4,13E+05                             |
|               |               |               |                                             |                                                                  |                                   |                                      |                            |            |                                             |                        |                                                      | A9419      | 413      | 13       | 10 µl                               | Gansauge and Meyer, 2013; manual | no            | 2,65E+07                    | 3,04E+05                             |
|               |               |               |                                             |                                                                  |                                   |                                      |                            |            |                                             |                        |                                                      | A9180      | 428      | 14       | 15                                  | Gansauge and Meyer, 2013; manual | no            | 1,09E+09                    | 9,70E+05                             |
| Mezmaiskaya 2 | SP2718        | 29 mg         | Previous                                    | yes                                                              | 500 µl                            | 500 µl                               | 50 µl                      | E2830      | 5M40 (Dabney et al., 2013)                  | Manual R               | Previous                                             | A9252      | 442      | 32       | 10 µl                               | Gansauge and Meyer, 2013; manual | no            | 3,58E+08                    | 5,65E+05                             |
|               |               |               |                                             |                                                                  |                                   |                                      |                            |            |                                             |                        |                                                      | A9253      | 443      | 33       | 10 µl                               | Gansauge and Meyer, 2013; manual | no            | 3,80E+08                    | 7,35E+05                             |
|               |               |               |                                             |                                                                  |                                   |                                      |                            |            |                                             |                        |                                                      | A13742     | 492      | 182      | 30                                  | Gansauge et al. 2017; automated  | no            | 6,34E+08                    | 1,13E+06                             |
|               |               |               |                                             |                                                                  |                                   |                                      |                            |            |                                             |                        |                                                      | A18478     | 445      | 123      | 30                                  | Gansauge et al. 2017; automated  | no            | 6,37E+08                    | 1,68E+06                             |
|               |               |               |                                             |                                                                  |                                   |                                      |                            |            |                                             |                        |                                                      | A18563     | 423      | 170      | 30                                  | Gansauge et al. 2017; automated  | no            | 1,31E+09                    | 1,02E+06                             |
|               |               |               |                                             |                                                                  |                                   |                                      |                            |            |                                             |                        |                                                      | A13743     | 488      | 157      | 30                                  | Gansauge et al. 2017; automated  | no            | 1,33E+09                    | 1,04E+06                             |
| Mezmaiskaya 2 | SP2718        | 15.8 mg       | This                                        | yes                                                              | 300 µl                            | 300 µl                               | 30 µl                      | E10550     | 5M40 (Dabney et al., 2013)                  | Automated purification | This                                                 | A19113     | 387      | 33       | 30                                  | Gansauge et al. 2017; automated  | no            | 3,28E+09                    | 6,10E+05                             |
|               |               |               |                                             |                                                                  |                                   |                                      |                            |            |                                             |                        |                                                      | A19113     | 387      | 33       | 30                                  | Gansauge et al. 2017; automated  | no            | 3,65E+08                    | 4,10E+04                             |
|               |               |               |                                             |                                                                  |                                   |                                      |                            |            |                                             |                        |                                                      | A19245     | 490      | 136      | 30                                  | Gansauge et al. 2017; automated  | no            | 1,45E+09                    | 3,20E+05                             |
|               |               |               |                                             |                                                                  |                                   |                                      |                            |            |                                             |                        |                                                      | A19440     | 389      | 80       | 30                                  | Gansauge et al. 2017; automated  | no            | 6,40E+07                    | 1,16E+04                             |
|               |               |               |                                             |                                                                  |                                   |                                      |                            |            |                                             |                        |                                                      | A19634     | 430      | 153      | 30                                  | Gansauge et al. 2017; automated  | no            | 6,68E+07                    | 1,07E+04                             |
|               |               |               |                                             |                                                                  |                                   |                                      |                            |            |                                             |                        |                                                      | A19634     | 430      | 153      | 30                                  | Gansauge et al. 2017; automated  | no            | 2,23E+09                    | 5,49E+05                             |
| Mezmaiskaya 2 | SP2718        | 17.5 mg       | This                                        | yes                                                              | 300 µl                            | 300 µl                               | 30 µl                      | E13527     | 5M40 (Dabney et al., 2013)                  | Manual Q               | This                                                 | A18865     | 399      | 147      | 30                                  | Gansauge et al. 2017; automated  | no            | 3,07E+09                    | 1,53E+06                             |
|               |               |               |                                             |                                                                  |                                   |                                      |                            |            |                                             |                        |                                                      | A19114     | 341      | 93       | 30                                  | Gansauge et al. 2017; automated  | no            | 1,95E+09                    | 1,06E+06                             |
|               |               |               |                                             |                                                                  |                                   |                                      |                            |            |                                             |                        |                                                      | A19246     | 480      | 152      | 30                                  | Gansauge et al. 2017; automated  | no            | 2,56E+09                    | 8,90E+05                             |
|               |               |               |                                             |                                                                  |                                   |                                      |                            |            |                                             |                        |                                                      | A19441     | 382      | 84       | 30                                  | Gansauge et al. 2017; automated  | no            | 1,61E+09                    | 3,57E+05                             |
|               |               |               |                                             |                                                                  |                                   |                                      |                            |            |                                             |                        |                                                      | A19635     | 420      | 111      | 30                                  | Gansauge et al. 2017; automated  | no            | 3,67E+08                    | 4,72E+04                             |
|               |               |               |                                             |                                                                  |                                   |                                      |                            |            |                                             |                        |                                                      | A19635     | 420      | 111      | 30                                  | Gansauge et al. 2017; automated  | no            | 3,67E+08                    | 4,72E+04                             |

Manual R: Roche silica columns (High Pure Viral Nucleic Acid kit; Roche)  
Manual Q: MinElute silica columns (Min Elute PCR purification kit; Qiagen)

**Table S2.1. DNA library information.**
